# Supplementary material for: Lipid Prospection Based on the Cellular Size of Phytoplankton Communities from Tropical Freshwater Ecosystems: A Systematic Literature Review
Source: MDPI journal article supplement (doi:10.3390/w15213774), 2023-10-28
Supplement: s1 [file s1]

# Supplementary materials

**List S1.** References collected from the platforms Scopus, SpringerLink, ScienceDirect, Web of Science, and Redalyc: Scientific articles, abstracts, chapter books, and reviews.

1. 11th International Conference plant functioning under environmental stress September 12–15, 2018, Cracow, Poland. *Acta Physiol. Plant.* 2018, 40, 193, s11738-018-2757-x, doi:10.1007/s11738-018-2757-x.
  2. 66TH ASMS. Conference on mass spectrometry and allied topics. *J. Am. Soc. Mass Spectrom.* 2018, 29, 1–300, doi:10.1007/s13361-018-1971-5.
  3. Abstract. *J. Ornithol.* 2006, 147, 1–297, doi:10.1007/s10336-006-0093-1.
  4. Abstract. *Photosyn. Res.* 2007, 91, 133–324, doi:10.1007/s11120-007-9197-6.
  5. Abstractbook of the Joint Conference 2017 of the DGHM & VAAM: Microbiology and Infection. *Biospektrum* 2017, 23, 1–377, doi:10.1007/s12268-017-0772-x.
  6. Abstracts 6th International Congress on Amino Acids Bonn, Federal Republic of Germany August 3<sup>rd</sup>, 1999. *Amino Acids* 1999, 17, 1–129, doi:10.1007/BF01362415.
  7. Abstracts. *Environ. Manage.* 1977, 1, 253–277, doi:10.1007/BF01867291.
  8. Abstracts. *Photosyn. Res.* 1992, 34, 79–244, doi:10.1007/BF00130821.
  9. Acheampong, E.; Mantey, P.; Weremfo, A. potential impact of marine heatwaves on selected phytoplankton adapted to the Gulf of Guinea during stable hydrographic periods. *Afr. J. Mar. Sci.* 2021, 43, 77–86, doi:10.2989/1814232X.2021.1879267.
  10. Acosta, V.; Montes, M.; Cortez, R.; Guevara, M.; Lodeiros, C. Crecimiento del mejillón verde *Perna viridis* (Bivalvia: Mytilidae) bajo sistema de cultivo de fondo en la ensenada de Turpialito, Golfo de Cariaco, Venezuela. *Rev. Biol. Trop.* 2012 Dec;60(4):1749-62.
  11. Adams, S.M.; Breck, J.E.; McLean, R.B. Cumulative Stress-Induced Mortality of Gizzard Shad in a Southeastern U.S. Reservoir. *Environ Biol Fish* 1985, 13, 103–112, doi:10.1007/BF00002578.
  12. Agathokleous, E.; Iavicoli, I.; Barceló, D.; Calabrese, E.J. Micro/nanoplastics effects on organisms: A review focusing on ‘Dose.’ *J. Hazard. Mater.* 2021, 417, 126084, doi:10.1016/j.jhazmat.2021.126084.
  13. Agrawal, S.C. Factors affecting spore germination in algae — Review. *Folia Microbiol.* 2009, 54, 273–302, doi:10.1007/s12223-009-0047-0.
  14. Alho, L.D.O.G.; Gebara, R.C.; Paina, K.D.A.; Sarmiento, H.; Melão, M.D.G.G. Responses of *Raphidocelis subcapitata* exposed to Cd and Pb: mechanisms of toxicity assessed by multiple endpoints. *Ecotoxicol. Environ. Saf.* 2019, 169, 950–959, doi:10.1016/j.ecoenv.2018.11.087.
  15. Alho, L.D.O.G.; Souza, J.P.; Rocha, G.S.; Mansano, A.D.S.; Lombardi, A.T.; Sarmiento, H.; Melão, M.G.G. Photosynthetic, morphological, and biochemical biomarkers as tools to investigate copper oxide nanoparticle toxicity to a freshwater chlorophyceae. *Environ. Pollut.* 2020, 265, 114856, doi:10.1016/j.envpol.2020.114856.
  16. Almeida, A.C.; Gomes, T.; Habuda-Stanić, M.; Lomba, J.A.B.; Romić, Ž.; Turkalj, J.V.; Lillicrap, A. characterization of multiple biomarker responses using flow cytometry to improve environmental hazard assessment with the green microalgae *Raphidocelis subcapitata*. *Sci. Total Environ.* 2019, 687, 827–838, doi:10.1016/j.scitotenv.2019.06.124.
  17. Almeida, A.C.; Gomes, T.; Lomba, J.A.B.; Lillicrap, A. Specific toxicity of azithromycin to the freshwater microalga *Raphidocelis subcapitata*. *Ecotoxicol. Environ. Saf.* 2021, 222, 112553, doi:10.1016/j.ecoenv.2021.112553.
  18. Alton, L.A.; Franklin, C.E. Drivers of amphibian declines: effects of ultraviolet radiation and interactions with other environmental factors. *Clim. Chang. Responses* 2017, 4, 6, doi:10.1186/s40665-017-0034-7.
  19. Amiraux, R.; Burot, C.; Bonin, P.; Massé, G.; Guasco, S.; Babin, M.; Vaultier, F.; Rontani, J.-F. Stress factors resulting from the arctic vernal sea-ice melt: impact on the viability of bacterial communities associated with sympagic algae. *Elementa-Sci. Anthropol.* 2020, 8, 076, doi:10.1525/elementa.076.
-

- 
20. Ammendolia, J.; Hamel, J.-F.; Mercier, A. Behavioural responses to hydrostatic pressure in selected echinoderms suggest hyperbaric constraint of bathymetric range. *Mar. Biol.* 2018, 165, 145, doi:10.1007/s00227-018-3399-7.
  21. André, C.; Bibault, J.F.; Gagné, F. identifying physiological traits of species resilience against environmental stress in freshwater mussels. *Ecotoxicology* 2021, 30, 1862–1871, doi:10.1007/s10646-021-02457-8.
  22. Andreeva, N.A.; Melnikov, V.V.; Snarskaya, D.D. The role of cyanobacteria in marine ecosystems. *Russ. J. Mar. Biol.* 2020, 46, 154–165, doi:10.1134/S1063074020030025.
  23. Appel, H.M. Phenolics in ecological interactions: the importance of oxidation. *J. Chem. Ecol.* 1993, 19, 1521–1552, doi:10.1007/BF00984895.
  24. Aravind, S.; Kumar, P.S.; Kumar, N.S.; Siddarth, N. Conversion of green algal biomass into bioenergy by pyrolysis. A review. *Environ. Chem. Lett.* 2020, 18, 829–849, doi:10.1007/s10311-020-00990-2.
  25. Arnold, A.A.; Genard, B.; Zito, F.; Tremblay, R.; Warschawski, D.E.; Marcotte, I. identification of lipid and saccharide constituents of whole microalgal cells by  $^{13}\text{C}$  Solid-State NMR. *Biochim. Biophys. Acta. Biomembr.* 2015, 1848, 369–377, doi:10.1016/j.bbamem.2014.07.017.
  26. Asencio, A.D. Permanent salt evaporation ponds in a semi-arid mediterranean region as model systems to study primary production processes under hypersaline conditions. *Estuar. Coast. Shelf Sci.* 2013, 124, 24–33, doi:10.1016/j.ecss.2013.03.006.
  27. Asociación Española de Toxicología. Simposio de toxicología en homenaje a Manuel Repetto. Sesión III. *Rev. Toxicol.* 2002, 19, 110–115.
  28. Asociación Española de Toxicología. XX Congreso Español de Toxicología y IV Iberoamericano. *Rev. toxicol.* 2013, 1–15.
  29. Baharian, N.B.; Letamendia, M.; Pérez, M.; Carnevia, D.; Brena, B. Nuevas metodologías para el análisis de microcistinas en peces: Estudio de *Astraloheros Facetus* expuestos *in vitro*. *Innotec.* 2020, 10–29. doi.org/10.12461/20.03.
  30. Baho, D.L.; Pomati, F.; Leu, E.; Hessen, D.O.; Moe, S.J.; Norberg, J.; Nizzetto, L. A single pulse of diffuse contaminants alters the size distribution of natural phytoplankton communities. *Sci. Total Environ.* 2019, 683, 578–588, doi:10.1016/j.scitotenv.2019.05.229.
  31. Bais, A.F.; Lucas, R.M.; Bornman, J.F.; Williamson, C.E.; Sulzberger, B.; Austin, A.T.; Wilson, S.R.; Andrady, A.L.; Bernhard, G.; McKenzie, R.L.; et al. environmental effects of ozone depletion, uv radiation and interactions with climate change: UNEP Environmental Effects Assessment Panel, Update 2017. *Photochem. Photobiol. Sci.* 2018, 17, 127–179, doi:10.1039/c7pp90043k.
  32. Baldisserotto, C.; Sabia, A.; Ferroni, L.; Pancaldi, S. biological aspects and biotechnological potential of marine diatoms in relation to different light regimens. *World J. Microbiol. Biotechnol.* 2019, 35, 1–9 doi:10.1007/s11274-019-2607-z.
  33. Banaszak, A.T.; Lesser, M.P. Effects of solar ultraviolet radiation on coral reef organisms. *Photochem. Photobiol. Sci.* 2009, 8, 1276–1294, doi:10.1039/b902763g.
  34. Barati, B.; Gan, S.-Y.; Lim, P.-E.; Beardall, J.; Phang, S.-M. green algal molecular responses to temperature stress. *Acta Physiol. Plant.* 2019, 41, 26, doi:10.1007/s11738-019-2813-1.
  35. Barka, S.; Gdara, I.; Ouanes-Ben Othmen, Z.; Mouelhi, S.; El Bour, M.; Hamza-Chaffai, A. Seasonal ecotoxicological monitoring of freshwater zooplankton in Bir Mcherga Dam (Tunisia). *Environ. Sci. Pollut. Res.* 2020, 27, 5670–5680, doi:10.1007/s11356-019-04271-6.
  36. Barra, L.; Chandrasekaran, R.; Corato, F.; Brunet, C. The challenge of ecophysiological biodiversity for biotechnological applications of marine microalgae. *Mar. Drugs* 2014, 12, 1641–1675, doi:10.3390/md12031641.
  37. Baud, J.-P.; Gérard, A.; Naciri-Graven, Y. comparative growth and mortality of bonamia ostreae -resistant and wild flat oysters, *ostrea edulis*, in an intensive system. I. First year of experiment. *Mar. Biol.* 1997, 130, 71–79, doi:10.1007/s002270050226.
  38. Beardall, J.; Sobrino, C.; Stojkovic, S. Interactions between the impacts of ultraviolet radiation, elevated  $\text{CO}_2$ , and nutrient limitation on marine primary producers. *Photochem. Photobiol. Sci.* 2009, 8, 1257–1265, doi:10.1039/b9pp00034h.
  39. Beardall, J.; Stojkovic, S.; Gao, K. interactive effects of nutrient supply and other environmental factors on the sensitivity of marine primary producers to ultraviolet radiation: implications for the impacts of global change. *Aquat. Biol.* 2014, 22, 5–23, doi:10.3354/ab00582.
  40. Beardall, J.; Young, E.; Roberts, S. Approaches for Determining Phytoplankton Nutrient Limitation: *Aquat. sci.* 2001, 63, 44–69, doi:10.1007/PL00001344.
  41. Bec, A.; Perga, M.-E.; Desvillettes, C.; Bourdier, G. How well can the fatty acid content of lake seston be predicted from its taxonomic composition?: seston taxonomic and fatty acid composition. *Freshw. Biol.* 2010, 55, 1958–1972, doi:10.1111/j.1365-2427.2010.02429.x.
  42. Beecraft, L.; Watson, S.B.; Smith, R.E.H. Innate resistance of PSII efficiency to sunlight stress is not an advantage for cyanobacteria compared to eukaryotic phytoplankton. *Aquat. Ecol.* 2019, 53, 347–364, doi:10.1007/s10452-019-09694-4.
  43. Bell, T.A.S.; Sen-Kilic, E.; Felföldi, T.; Vasas, G.; Fields, M.W.; Peyton, B.M. Microbial community changes during a toxic cyanobacterial bloom in an alkaline Hungarian Lake. *Antonie van Leeuwenhoek* 2018, 111, 2425–2440, doi:10.1007/s10482-018-1132-7.
  44. Bemal, S.; Anil, A.C. effects of salinity on cellular growth and exopolysaccharide production of freshwater synechococcus strain CCAP1405. *J. Plankton Res.* 2018, 40, 46–58, doi:10.1093/plankt/fbx064.

- 
45. Bergman Filho, T.U.; Soares, A.M.V.M.; Loureiro, S. energy budget in *Daphnia magna* exposed to natural stressors. *Environ. Sci. Pollut. Res.* 2011, 18, 655–662, doi:10.1007/s11356-010-0413-0.
  46. Bernatowicz, P.; Pijanowska, J. *Daphnia* response to biotic stress is modified by PCBs. *Ecotoxicol. Environ. Saf.* 2011, 74, 711–718, doi:10.1016/j.ecoenv.2010.10.029.
  47. Berro, E.A.; Valverde, J.C. Hacia el cultivo integral del pulpo de roca (*Octopus vulgaris*). *Rev. AquaTIC.* 2013, 23–26.
  48. Bertrand, M.; Poirier, I. Photosynthetic organisms and excess of metals. *Photosynth.* 2005, 43, 345–353, doi:10.1007/s11099-005-0058-2.
  49. Best, J.H.; Eddy, F.B.; Codd, G.A. Effects of purified microcystin-Lr and cell extracts of *Microcystis* strains PCC 7813 and CYA 43 on Cardiac Function in Brown Trout (*Salmo Trutta*) Alevins. *Fish Physiol. Biochem.* 2001, 24, 171–178, doi:10.1023/A:1014081827372.
  50. Blanda, E.; Drillet, G.; Huang, C.-C.; Hwang, J.-S.; Højgaard, J.K.; Jakobsen, H.H.; Rayner, T.A.; Su, H.-M.; Hansen, B.W. an analysis of how to improve production of copepods as live feed from tropical taiwanese outdoor aquaculture ponds. *Aquaculture* 2017, 479, 432–441, doi:10.1016/j.aquaculture.2017.06.018.
  51. Boicourt, W.C. The Estuary as a Filter: Physical Processes: October 22–26, 1983 Virginia Beach, Virginia. *Estuaries* 1983, 6, 252–337, doi:10.1007/BF02804333.
  52. Bornman, J.F.; Barnes, P.W.; Robinson, S.A.; Ballaré, C.L.; Flint, S.D.; Caldwell, M.M. Solar ultraviolet radiation and ozone depletion-driven climate change: effects on terrestrial ecosystems. *Photochem. Photobiol. Sci.* 2014, 14, 88–107, doi:10.1039/c4pp90034k.
  53. Boroda, A.V.; Kipryushina, Y.O.; Odintsova, N.A. The effects of cold stress on *Mytilus* species in the natural environment. *Cell Stress and Chaperones* 2020, 25, 821–832, doi:10.1007/s12192-020-01109-w.
  54. Bose, K.S.; Sarma, R.H. Delineation of the intimate details of the backbone conformation of pyridine nucleotide coenzymes in aqueous solution. *Biochem. Biophys. Res. Commun.* 1975, 66, 1173–1179, doi:10.1016/0006-291x(75)90482-9.
  55. Bowman, L.L.; Kondrateva, E.S.; Timofeyev, M.A.; Yampolsky, L.Y. temperature gradient affects differentiation of gene expression and SNP allele frequencies in the dominant lake baikal zooplankton species. *Mol. Ecol.* 2018, 27, 2544–2559, doi:10.1111/mec.14704.
  56. Broccoli, A.; Anselmi, S.; Cavallo, A.; Ferrari, V.; Prevedelli, D.; Pastorino, P.; Renzi, M. Ecotoxicological effects of new generation pollutants (nanoparticles, amoxicillin and white musk) on freshwater and marine phytoplankton species. *Chemosphere* 2021, 279, 130623, doi:10.1016/j.chemosphere.2021.130623.
  57. Brown, N.E.M.; Bernhardt, J.R.; Harley, C.D.G. energetic context determines species and community responses to ocean acidification. *Ecology* 2020, 101, doi:10.1002/ecy.3073.
  58. Bryan, G.W. Recent trends in research on heavy-metal contamination in the Sea. *Helgol. Mar. Res.* 1980, 33, 6–25, doi:10.1007/BF02414731.
  59. Buck, W.R.; Heald, S.V.; Holmgren, N.H.; Zanoni, T.A. Index to American Literature. *Brittonia* 1998, 50, 392–415, doi:10.1007/BF02810789.
  60. Bull, A.T. Biotechnology for environmental quality: closing the circles. *Biodivers. Conserv.* 1996, 5, 1–25, doi:10.1007/BF00056289.
  61. Bull, A.T. The renaissance of continuous culture in the post-genomics age. *J. Ind. Microbiol. Biotechnol.* 2010, 37, 993–1021, doi:10.1007/s10295-010-0816-4.
  62. C. De, B.; Meena, D.K.; Behera, B.K.; Das, P.; Das Mohapatra, P.K.; Sharma, A.P. Probiotics in fish and shellfish culture: immunomodulatory and ecophysiological responses. *Fish Physiol. Biochem.* 2014, 40, 921–971, doi:10.1007/s10695-013-9897-0.
  63. Cabrerizo, M.J.; Carrillo, P.; Villafañe, V.E.; Walter Helbling, E. Current and predicted global change impacts of uvr, temperature and nutrient inputs on photosynthesis and respiration of key marine phytoplankton groups. *J. Exp. Mar. Biol. Ecol.* 2014, 461, 371–380, doi:10.1016/j.jembe.2014.08.022.
  64. Cardoso, S.J.; Nabout, J.C.; Farjalla, V.F.; Lopes, P.M.; Bozelli, R.L.; Huszar, V.L.M.; Roland, F. environmental factors driving phytoplankton taxonomic and functional diversity in amazonian floodplain lakes. *Hydrobiologia* 2017, 802, 115–130, doi:10.1007/s10750-017-3244-x.
  65. Carranco, M.E.; Calvo, C.; Arellano, L.; Pérez-Gil, F. Ávila E. Inclusión de la harina de cabezas de camarón *Penaeus* sp. en raciones para gallinas ponedoras. Efecto sobre la concentración de pigmento rojo de yema y calidad de huevo. *Interciencia* 2003, 28, 328–33.
  66. Castro-González, M.I. Ácidos grasos omega 3: beneficios y fuentes. *Interciencia* 2002, 27, 128–136.
  67. Cavan, E.L.; Laurenceau-Cornec, E.C.; Bressac, M.; Boyd, P.W. Exploring the ecology of the mesopelagic biological pump. *Prog. Oceanogr.* 2019, 176, 102125, doi:10.1016/j.pocean.2019.102125.
  68. Caviedes, A.J.; Perez, A.P. Respuestas hematológicas, hepáticas y esplénicas al estrés de tilapias en jaulas y libres en el embalse de Betania, Colombia. *Rev. AquaTIC.* 2017, 8–20.
  69. Cembella, A.D. Chemical ecology of eukaryotic microalgae in marine ecosystems. *Phycologia* 2003, 42, 420–447, doi:10.2216/i0031-8884-42-4-420.1.

- 
70. Chan, W.Y.; Oakeshott, J.G.; Buerger, P.; Edwards, O.R.; Oppen, M.J.H. Adaptive responses of free-living and symbiotic microalgae to simulated future ocean conditions. *Glob. Change Biol.* 2021, 27, 1737–1754, doi:10.1111/gcb.15546.
  71. Chang, J.-S. understanding the role of ecological indicator use in assessing the effects of desalination plants. *Desalination* 2015, 365, 416–433, doi:10.1016/j.desal.2015.03.013.
  72. Chen, C.; Pang, X.; Wang, Y.; Kong, M.; Long, L.; Xu, M.; Xiao, Y.; He, J.; Yang, G.; Deng, S. Antioxidant responses and microcystins accumulation in *Corbicula fluminea* following the control of algal blooms using chitosan-modified clays. *J. Soils Sediments* 2021, 21, 3505–3514, doi:10.1007/s11368-021-03022-w.
  73. Chen, C.Y.; Sillett, K.B.; Folt, C.L.; Whittemore, S.L.; Barchowsky, A. Molecular and demographic measures of arsenic stress in *Daphnia Pulex*. *Hydrobiologia* 1999, 401, 229–238, doi:10.1023/A:1003738427354.
  74. Chen, L.; Wang, Y.; Shi, L.; Zhao, J.; Wang, W. Identification of allelochemicals from pomegranate peel and their effects on *Microcystis aeruginosa* growth. *Environ. Sci. Pollut. Res.* 2019, 26, 22389–22399, doi:10.1007/s11356-019-05507-1.
  75. Chen, R.-S.; Zhang, L.; Wei, F.-J.; Yuan, L.-Y.; Zhao, P.; Wang, H.-Y.; Gong, Y.-F. Effects of  $Mn^{2+}$  on neutral lipid content,  $c_4$  pathway, and related gene expression in *Phaeodactylum tricornutum*. *J. Appl. Phycol.* 2021, 33, 2123–2133, doi:10.1007/s10811-021-02471-7.
  76. Chia, M.A.; Bittencourt-Oliveira, M.D.C. Allelopathic interactions between phytoplankton species alter toxin production, oxidative response, and nitrogen fixation. *Hydrobiologia* 2021, 848, 4623–4635, doi:10.1007/s10750-021-04665-z.
  77. Chia, M.A.; Chimdirim, P.K.; Japhet, W.S. Lead induced antioxidant response and phenotypic plasticity of *Scenedesmus quadricauda* (Turp.) de Brébisson under different nitrogen concentrations. *J. Appl. Phycol.* 2015, 27, 293–302, doi:10.1007/s10811-014-0312-8.
  78. Chia, M.A.; Lorenzi, A.S.; Ameh, I.; Dauda, S.; Cordeiro-Araújo, M.K.; Agee, J.T.; Okpanachi, I.Y.; Adesalu, A.T. Susceptibility of phytoplankton to the increasing presence of active pharmaceutical ingredients (APIs) in the aquatic environment: a review. *Aquat. Toxicol.* 2021, 234, 105809, doi:10.1016/j.aquatox.2021.105809.
  79. Cho, H.S. Special Issue: Abstracts of the 11th International Conference on Environmental Health Science, 14–16 October 2018, Yeosu, Republic of Korea: Advanced Technology for Health, Therapeutics, and Environment in Fourth Industrial Revolution. *Toxicol. Environ. Health Sci.* 2018, 10, 1–70, doi:10.1007/s13530-018-0369-x.
  80. Chu, F.-L.E.; Greaves, J. Metabolism of palmitic, linoleic, and linolenic acids in adult oysters, *Crassostrea virginica*. *Mar. Biol.* 1991, 110, 229–236, doi:10.1007/BF01313708.
  81. Claereboudt, M.R.; Himmelman, J.H. Recruitment, growth and production of giant scallops (*Placopecten magellanicus*) along an environmental gradient in Baie Des Chaleurs, Eastern Canada. *Mar. Biol.* 1996, 124, 661–670, doi:10.1007/BF00351047.
  82. Cobos Ruiz, M.; Castro Gómez, J.C.; Cerdeira Gutierrez, L.A. Potencial biotecnológico para la producción sustentable de biodiesel de microalgas oleaginosas aisladas del Río Itaya, Loreto, Perú. *Ecología aplicada*. 2014, 13, 169-75
  83. Cobos Ruiz, M.; Paredes Rodríguez, J.D.; Castro Gómez, J.C. Inducción de la producción de lípidos totales en microalgas sometidas a estrés nutritivo. *Acta Biol. Colomb.* 2016 21, 17-26.
  84. Combined Author and Title Index. *Mar. Biol.* 1980, 60, 227–291, doi:10.1007/BF00429395.
  85. Conlan, J.A.; Bay, L.K.; Jones, A.; Thompson, A.; Francis, D.S. Seasonal variation in the lipid profile of *Acropora millepora* at Halfway Island, Great Barrier Reef. *Coral Reefs* 2020, 39, 1753–1765, doi:10.1007/s00338-020-02001-w.
  86. Cook, G.; Teufel, A.; Kalra, I.; Li, W.; Wang, X.; Priscu, J.; Morgan-Kiss, R. The antarctic psychrophiles *Chlamydomonas* spp. UWO241 and ICE-MDV exhibit differential restructuring of photosystem I in response to iron. *Photosyn. Res.* 2019, 141, 209–228, doi:10.1007/s11120-019-00621-0.
  87. Cozza, D.; Torelli, A.; Veltri, A.; Ferrari, M.; Marieschi, M.; Cozza, R. Ultrastructural features, chromium content and in situ immunodetection of 5-methyl-cytosine following Cr (VI) treatment in two strains of *Scenedesmus acutus* M. (Chlorophyceae) with different chromium sensitivity. *Eur. J. Phycol.* 2016, 51, 294–306, doi:10.1080/09670262.2016.1157902.
  88. Crandall, J.B.; Teece, M.A.; Estes, B.A.; Manfrino, C.; Ciesla, J.H. Nutrient acquisition strategies in mesophotic hard corals using compound specific stable isotope analysis of sterols. *J. Exp. Mar. Biol. Ecol.* 2016, 474, 133–141, doi:10.1016/j.jembe.2015.10.010.
  89. D Armas, H.; Yáñez, D.; Reyes, D.; Salazar, G. Composición de ácidos grasos de los caracoles marinos *Phyllonotus pomum* y *Chicoreus brevivfrons* (Gastropoda: Muricidae). *Rev. Biol. Trop.* 2010, 58, 645-54.
  90. Dahlgren, K.; Eriksson Wiklund, A.-K.; Andersson, A. the influence of autotrophy, heterotrophy and temperature on pelagic food web efficiency in a brackish water system. *Aquat. Ecol.* 2011, 45, 307–323, doi:10.1007/s10452-011-9355-y.
  91. Das, P.K.; Rani, J.; Rawat, S.; Kumar, S. Microalgal co-cultivation for biofuel production and bioremediation: current status and benefits. *Bioenerg. Res.* 2022, 15, 1–26, doi:10.1007/s12155-021-10254-8.
  92. Dash, H.R.; Mangwani, N.; Chakraborty, J.; Kumari, S.; Das, S. Marine bacteria: potential candidates for enhanced bioremediation. *Appl. Microbiol. Biotechnol.* 2013, 97, 561–571, doi:10.1007/s00253-012-4584-0.
  93. Dashkova, V.; Malashenkov, D.; Poulton, N.; Vorobjev, I.; Barteneva, N.S. Imaging flow cytometry for phytoplankton analysis. *Methods* 2017, 112, 188–200, doi:10.1016/j.ymeth.2016.05.007.
  94. Davies, A.G. Pollution studies with marine plankton: part II. Heavy metals. In *Advances in Mar. Biol.* 1979, 15, 381–508, doi:10.1016/S0065-2881(08)60408-3.

- 
95. de la Lanza Espino, G.; Pérez, M.A.; Pérez, J.L. Diferenciación hidrogeomorfológica de los ambientes costeros del Pacífico, del Golfo de México y del Mar Caribe. *Investigaciones Geográficas, Boletín del Instituto de Geografía* 2013, 33-50.
96. Dean, A.P.; Sigee, D.C.; Estrada, B.; Pittman, J.K. Using FTIR spectroscopy for rapid determination of lipid accumulation in response to nitrogen limitation in freshwater microalgae. *Bioresour. Technol.* 2010, 101, 4499–4507, doi:10.1016/j.biortech.2010.01.065.
97. de-Bashan, L.E.; Bashan, Y. Bionota: Bacterias promotoras de crecimiento de microalgas: una nueva aproximación en el tratamiento de aguas residuales. *Rev. Colomb. Biotecnol.* 2003, 5, 85-90.
98. Degelau, A.; Freitag, R.; Linz, F.; Middendorf, C.; Scheper, T.; Bley, T.; Müller, S.; Stoll, P.; Reardon, K.F. Immuno- and flow cytometric analytical methods for biotechnological research and process monitoring. *J. Biotechnol.* 1992, 25, 115–144, doi:10.1016/0168-1656(92)90112-M.
99. Delgadillo, R.R.; Magaña, F.G. Contribución al conocimiento de la flora de la Bahía de Banderas, Nayarit-Jalisco, México. *Ciencia ERGO-SUM, Revista Científica Multidisciplinaria de Prospectiva.* 1999, 6, 134-146.
100. Delorme, N.; Biessy, L.; South, P.; Zamora, L.; Ragg, N.; Burritt, D. Stress-on-stress responses of a marine mussel, *Perna canaliculus*: food limitation reduces the ability to cope with heat stress in juveniles. *Mar. Ecol. Prog. Ser.* 2020, 644, 105–117, doi:10.3354/meps13375.
101. Denis Ávila, D.; Curbelo Benitez, E.A.; Ferrer-Sánchez, Y. Modelación del efecto de la reproducción colonial de *Bubulcus ibis* (Aves: Ardeidae) en el flujo de biomasa y energía de los manglares costeros. *Rev. Biol. Trop.* 2019, 67, 784-809.
102. Deudero, S.; Blanco, A.; Box, A.; Mateu-Vicens, G.; Cabanellas-Reboredo, M.; Sureda, A. Interaction between the invasive macroalga *Lophocladia lallemandii* and the bryozoan *Reteporella Grimaldii* at seagrass meadows: density and physiological responses. *Biol. Invasions* 2010, 12, 41–52, doi:10.1007/s10530-009-9428-1.
103. Dias, E.; Morais, P.; Antunes, C.; Hoffman, J.C. Linking terrestrial and benthic estuarine ecosystems: organic matter sources supporting the high secondary production of a non-indigenous bivalve. *Biol. Invasions.* 2014, 16, 2163–2179, doi:10.1007/s10530-014-0655-8.
104. Dickinson, S.; Mientus, M.; Frey, D.; Amini-Hajibashi, A.; Ozturk, S.; Shaikh, F.; Sengupta, D.; El-Halwagi, M.M. A review of biodiesel production from microalgae. *Clean Techn. Environ. Policy* 2017, 19, 637–668, doi:10.1007/s10098-016-1309-6.
105. Dilliplaine, K.; Oggier, M.; Collins, R.E.; Eicken, H.; Gradinger, R.; Bluhm, B.A. Crude oil exposure reduces ice algal growth in a sea-ice mesocosm experiment. *Polar Biol.* 2021, 44, 525–537, doi:10.1007/s00300-021-02818-3.
106. Djebbi, E.; Bonnet, D.; Pringault, O.; Tlili, K.; Yahia, M.N.D. Effects of nickel oxide nanoparticles on survival, reproduction, and oxidative stress biomarkers in the marine calanoid copepod *Centropages ponticus* under short-term exposure. *Environ. Sci. Pollut. Res.* 2021, 28, 21978–21990, doi:10.1007/s11356-020-11781-1.
107. Du, Y.; Wang, J.; Zhu, F.; Mai, D.; Xiang, Z.; Chen, J.; Guo, R. Comprehensive assessment of three typical antibiotics on cyanobacteria (*Microcystis aeruginosa*): the impact and recovery capability. *Ecotoxicol. Environ. Saf.* 2018, 160, 84–93, doi:10.1016/j.ecoenv.2018.05.035.
108. Duan, W.; Meng, F.; Lin, Y.; Wang, G. Toxicological effects of phenol on four marine microalgae. *Environ. Toxicol. Pharmacol.* 2017, 52, 170–176, doi:10.1016/j.etap.2017.04.006.
109. Egli, B. Blaualgenliteratur aus den Jahren 1968 bis 1972. *Schweiz. Z. Hydrologie* 1973, 35, 162–195, doi:10.1007/BF02502071.
110. Elisabeth, B.; Rayen, F.; Behnam, T. Microalgae culture quality indicators: a review. *Crit. Rev. Biotechnol.* 2021, 41, 457–473, doi:10.1080/07388551.2020.1854672.
111. El-Magsodi, M.O.; Bossier, P.; Sorgeloos, P.; Van Stappen, G. Hatching and nutritional quality of artemia cysts progressively deteriorates as a function of increased exposure to hydration/dehydration cycles. *Aquac. Int.* 2014, 22, 1515–1532, doi:10.1007/s10499-014-9763-9.
112. Esperanza, M.; Seoane, M.; Rioboo, C.; Herrero, C.; Cid, Á. Differential toxicity of the UV-filters BP-3 and BP-4 in *Chlamydomonas reinhardtii*: a flow cytometric approach. *Sci. Total Environ.* 2019, 669, 412–420, doi:10.1016/j.scitotenv.2019.03.116.
113. Estrada, N.; Rodríguez-Jaramillo, C.; Contreras, G.; Ascencio, F. Effects of induced paralysis on hemocytes and tissues of the giant lions-paw scallop by paralyzing shellfish poison. *Mar. Biol.* 2010, 157, 1401–1415, doi:10.1007/s00227-010-1418-4.
114. Faber, W.W.; Preisig, H.R. Calcified structures and calcification in protists. *Protoplasma* 1994, 181, 78–105, doi:10.1007/BF01666390.
115. Falasco, E.; Bona, F.; Badino, G.; Hoffmann, L.; Ector, L. Diatom teratological forms and environmental alterations: a review. *Hydrobiologia* 2009, 623, 1–35, doi:10.1007/s10750-008-9687-3.
116. Falasco, E.; Ector, L.; Wetzel, C.E.; Badino, G.; Bona, F. looking back, looking forward: a review of the new literature on diatom teratological forms (2010–2020). *Hydrobiologia* 2021, 848, 1675–1753, doi:10.1007/s10750-021-04540-x.
117. Fan, P.; Xu, P.; Zhu, Y.; Tu, X.; Song, G.; Zuo, Y.; Bi, Y. Addition of humic acid accelerates the growth of *Euglena pisciformis* AEW501 and the accumulation of lipids. *J. Appl. Phycol.* 2022, 34, 51–63, doi:10.1007/s10811-021-02623-9.
118. Farcy, E.; Burgeot, T.; Haberkorn, H.; Auffret, M.; Lagadic, L.; Allenou, J.-P.; Budzinski, H.; Mazzella, N.; Pete, R.; Heydorff, M.; et al. An integrated environmental approach to investigate biomarker fluctuations in the blue mussel *Mytilus edulis* L. in the Vilaine Estuary, France. *Environ. Sci. Pollut. Res.* 2013, 20, 630–650, doi:10.1007/s11356-012-1316-z.
119. Febles-Patrón, J.L.; Hoogesteijn, A. Evaluación preliminar de la eficiencia en las lagunas de oxidación de la ciudad de Mérida, Yucatán. *Ingeniería.* 2010;14(2):127-37.

- 
120. Fedonkin, M.A. Eukaryotization of the early biosphere: a biogeochemical aspect. *Geochem. Int.* 2009, 47, 1265–1333, doi:10.1134/S0016702909130011.
121. Feijão, E.; Gameiro, C.; Franzitta, M.; Duarte, B.; Caçador, I.; Cabrita, M.T.; Matos, A.R. Heat wave impacts on the model diatom *Phaeodactylum tricornutum*: searching for photochemical and fatty acid biomarkers of thermal stress. *Ecol. Indic.* 2018, 95, 1026–1037, doi:10.1016/j.ecolind.2017.07.058.
122. Feng, Y.; Chang, X.; Zhao, L.; Li, X.; Li, W.; Jiang, Y. Nanaomycin a methyl ester, an actinomycete metabolite: algicidal activity and the physiological response of *Microcystis aeruginosa*. *Ecol. Eng.* 2013, 53, 306–312, doi:10.1016/j.ecoleng.2012.12.066.
123. Ferreira, P.R.; Arrieche, D.; Acosta, V.; Pérez, L.; Lodeiros, C. Histoquímica de la glándula digestiva en la ostra perla *Pinctada imbricata* (Pterioida: Pteriidae) durante su ciclo gametogénico, Venezuela. *Rev. Biol. Trop.* 2016, 64, 849–58.
124. Ferreira Da Silva, E.; Almeida, S.F.P.; Nunes, M.L.; Luís, A.T.; Borg, F.; Hedlund, M.; De Sá, C.M.; Patinha, C.; Teixeira, P. Heavy metal pollution downstream the abandoned coval da mó mine (portugal) and associated effects on epilithic diatom communities. *Sci. Total Environ.* 2009, 407, 5620–5636, doi:10.1016/j.scitotenv.2009.06.047.
125. Fichez R, Adjeroud M, Bozec YM, Breau L, Chancerelle Y, Chevillon C, Douillet P, Fernandez JM, Frouin P, Kulbicki M, Moreton B. A review of selected indicators of particle, nutrient and metal inputs in coral reef lagoon systems. *Aquat. Living Resour.* 2005, 18, 125–47. <https://doi.org/10.1051/alr:2005015>
126. Flores, H.; Atkinson, A.; Kawaguchi, S.; Krafft, B.; Milinevsky, G.; Nicol, S.; Reiss, C.; Tarling, G.; Werner, R.; Bravo Rebolledo, E.; et al. Impact of climate change on Antarctic Krill. *Mar. Ecol. Prog. Ser.* 2012, 458, 1–19, doi:10.3354/meps09831.
127. Fujibayashi, M.; Tanaka, N.; Hashido, S.; Takasawa, A.; Nishimura, O. Nutritional quality of fish faeces is enhanced by highly unsaturated fatty acid-producing heterotrophic protozoa. *Acta Oecol.* 2018, 89, 21–26, doi:10.1016/j.actao.2018.04.003.
128. Fujise, L.; Nitschke, M.R.; Frommlet, J.C.; Serôdio, J.; Woodcock, S.; Ralph, P.J.; Suggett, D.J. Cell cycle dynamics of cultured coral endosymbiotic microalgae (Symbiodinium ) across different types (Species) under alternate light and temperature conditions. *J. Eukaryot. Microbiol.* 2018, 65, 505–517, doi:10.1111/jeu.12497.
129. Furusato, E.; Asaeda, T. A dynamic model of darkness tolerance for phytoplankton: model description. *Hydrobiologia* 2009, 619, 67–88, doi:10.1007/s10750-008-9601-z.
130. Fuszard, M.A.; Wright, P.C.; Biggs, C.A. Comparative quantitative proteomics of prochlorococcus ecotypes to a decrease in environmental phosphate concentrations. *Aquat. Biosyst.* 2012, 8, 7, doi:10.1186/2046-9063-8-7.
131. Gao, K. Chinese studies on the edible blue-green alga, *Nostoc flagelliforme*: a review. *J. Appl. Phycol.* 1998, 10, 37–49, doi:10.1023/A:1008014424247.
132. Gao, K.; Zhang, Y.; Häder, D.-P. Individual and interactive effects of ocean acidification, global warming, and UV radiation on phytoplankton. *J. Appl. Phycol.* 2018, 30, 743–759, doi:10.1007/s10811-017-1329-6.
133. Garrison, H.S.; Tang, K.W. Effects of episodic turbulence on diatom mortality and physiology, with a protocol for the use of Evans Blue stain for live–dead determinations. *Hydrobiologia* 2014, 738, 155–170, doi:10.1007/s10750-014-1927-0.
134. Garzke, J.; Sommer, U.; Ismar, S.M.H. Is the chemical composition of biomass the agent by which ocean acidification influences on zooplankton ecology? *Aquat. Sci.* 2017, 79, 733–748, doi:10.1007/s00027-017-0532-5.
135. Garzke, J.; Sommer, U.; Ismar-Rebitz, S.M.H. Zooplankton growth and survival differentially respond to interactive warming and acidification effects. *J. Plankton Res.* 2020, 42, 189–202, doi:10.1093/plankt/fbaa005.
136. Geider, R.J. Light and temperature dependence of the carbon to chlorophyll a ratio in microalgae and cyanobacteria: implications for physiology and growth of phytoplankton. *New Phytol.* 1987, 106, 1–34, doi:10.1111/j.1469-8137.1987.tb04788.x.
137. Geoffroy, L.; Dewez, D.; Vernet, G.; Popovic, R. Oxyfluorfen toxic effect on *S. obliquus* evaluated by different photosynthetic and enzymatic biomarkers. *Arch. Environ. Contam. Toxicol.* 2003, 45, 445–452, doi:10.1007/s00244-003-2217-4.
138. Ger, K.A.; Urrutia-Cordero, P.; Frost, P.C.; Hansson, L.-A.; Sarnelle, O.; Wilson, A.E.; Lüring, M. The interaction between cyanobacteria and zooplankton in a more eutrophic world. *Harmful Algae* 2016, 54, 128–144, doi:10.1016/j.hal.2015.12.005.
139. Ghanbarzadeh, M.; Niknam, V.; Soltani, N.; Ebrahimzadeh, H.; Shahavi, M.H. Removal of phenanthrene by some microalga species and study of antioxidative compounds in *Nostoc calcicola* ISC 89. *J. Soils Sediments* 2022, 22, 109–119, doi:10.1007/s11368-021-03065-z.
140. Ghasemi, Y.; Rasoul-Amini, S.; Naseri, A.T.; Montazeri-Najafabady, N.; Mobasher, M.A.; Dabbagh, F. Microalgae biofuel potentials (review). *Appl. Biochem. Microbiol.* 2012, 48, 126–144, doi:10.1134/S0003683812020068.
141. Giang, P.T.; Burkina, V.; Sakalli, S.; Schmidt-Posthaus, H.; Rasmussen, M.K.; Randak, T.; Grabic, R.; Grabicova, K.; Fedorova, G.; Koba, O.; et al. Effects of multi-component mixtures from sewage treatment plant effluent on common carp (*Cyprinus carpio*) under fully realistic condition. *Environ. Manage.* 2019, 63, 466–484, doi:10.1007/s00267-017-0964-7.
142. Gil, F.N.; Gonçalves, A.C.; Becker, J.D.; Viegas, C.A. Comparative analysis of transcriptomic responses to sub-lethal levels of six environmentally relevant pesticides in *Saccharomyces cerevisiae*. *Ecotoxicology* 2018, 27, 871–889, doi:10.1007/s10646-018-1929-1.
143. Girard, L.; Lantoine, F.; Lami, R.; Vouvé, F.; Suzuki, M.T.; Baudart, J. Genetic diversity and phenotypic plasticity of ahl-mediated quorum sensing in environmental strains of *Vibrio mediterranei*. *ISME J.* 2019, 13, 159–169, doi:10.1038/s41396-018-0260-4.
144. Glazier, D.S. Beyond the : Variation in the intra- and interspecific scaling of metabolic rate in animals. *Biol. Rev.* 2005, 80, 611, doi:10.1017/S1464793105006834.

- 
145. Glibert, P.M. Eutrophication, harmful algae and biodiversity - challenging paradigms in a world of complex nutrient changes. *Mar. Pollut. Bull.* 2017, 124, 591–606, doi:10.1016/j.marpolbul.2017.04.027.
146. Glibert, P.M.; Burkholder, J.M.; Kana, T.M. recent insights about relationships between nutrient availability, forms, and stoichiometry, and the distribution, ecophysiology, and food web effects of pelagic and benthic *Prorocentrum* species. *Harmful Algae* 2012, 14, 231–259, doi:10.1016/j.hal.2011.10.023.
147. Glibert, P.M.; Heil, C.A.; Madden, C.J.; Kelly, S.P. Dissolved organic nutrients at the interface of fresh and marine waters: flow regime changes, biogeochemical cascades and picocyanobacterial blooms—the example of Florida Bay, USA. *Biogeochemistry* 2023, 164, 229–255, doi:10.1007/s10533-021-00760-4.
148. Gomes, M.P.; Garcia, Q.S.; Barreto, L.C.; Pimenta, L.P.S.; Matheus, M.T.; Figueredo, C.C. Allelopathy: an overview from micro-to macroscopic organisms, from cells to environments, and the perspectives in a climate-changing world. *Biologia* 2017, 72, 113–129, doi:10.1515/biolog-2017-0019.
149. Gomes, T.; Almeida, A.C.; Georgantzopoulou, A. Characterization of cell responses in *Rhodomonas baltica* exposed to PMMA nanoplastics. *Sci. Total Environ.* 2020, 726, 138547, doi:10.1016/j.scitotenv.2020.138547.
150. Gómez LC, Valero NV, Avendaño EM. Bacterias halotolerantes/alcalófilas productoras de ácido indol acético (AIA) asociadas a *Arthrospira platensis* (Cyanophyceae). *Rev. Colomb. Biotecnol.* 2012, 14, 81–8.
151. Gómez Luna L, Sosa Montano A, Moreno Castillo I, Jover Capote A. Biodiversidad, morfometría y alimentación de los cangrejos del género *Callinectes* (Decapoda: Portunidae) en Santiago de Cuba. *Rev. Biol. Trop.* 2009, 57, 671–86.
152. González-Fernández, C.; Albentosa, M.; Campillo, J.A.; Viñas, L.; Romero, D.; Franco, A.; Bellas, J. Effect of nutritive status on *Mytilus galloprovincialis* pollution biomarkers: implications for large-scale monitoring programs. *Aquat. Toxicol.* 2015, 167, 90–105, doi:10.1016/j.aquatox.2015.07.007.
153. González-Naranjo, V.; Boltes, K.; De Bustamante, I.; Palacios-Díaz, P. Environmental risk of combined emerging pollutants in terrestrial environments: chlorophyll a fluorescence analysis. *Environ. Sci. Pollut. Res.* 2015, 22, 6920–6931, doi:10.1007/s11356-014-3899-z.
154. González-Olalla, J.M.; Medina-Sánchez, J.M.; Norici, A.; Carrillo, P. Regulation of phagotrophy by prey, low nutrients, and low light in the mixotrophic Haptophyte *Isochrysis galbana*. *Microb. Ecol.* 2021, 82, 981–993, doi:10.1007/s00248-021-01723-w.
155. Gordillo, F.J.L.; Goutx, M.; Figueroa, F.L.; Niell, F.X. Effects of light intensity, CO<sub>2</sub> and nitrogen supply on lipid class composition of *Dunaliella viridis*. *J. Appl. Phycol.* 1998, 10, 135–144, doi:10.1023/A:1008067022973.
156. Greenberg, B.M.; Huang, X.-D.; Dixon, D.G. Applications of the aquatic higher plant *Lemna gibba* for ecotoxicological assessment. *J. aquat. ecosyst. health* 1992, 1, 147–155, doi:10.1007/BF00044046.
157. Gu, S.; Zheng, H.; Xu, Q.; Sun, C.; Shi, M.; Wang, Z.; Li, F. comparative toxicity of the plasticizer dibutyl phthalate to two freshwater algae. *Aquat. Toxicol.* 2017, 191, 122–130, doi:10.1016/j.aquatox.2017.08.007.
158. Guevara, M.; Bastardo, L.; Cortez, R.; Arredondo-Vega, B.; Romero, L.; Gómez, P. Pastas de *Rhodomonas salina* (Cryptophyta) como alimento para *Brachionus plicatilis* (Rotifera). *Rev. Biol. Trop.* 2011, 59, 1503–15.
159. Guo, L.; Dai, L.; Yang, K.; Li, D.; Li, G. Physiological changes of submerged macrophytes in response to a floating filamentous green algae bloom in clear-water conditions. *J. Ocean. Limnol.* 2018, 36, 1604–1614, doi:10.1007/s00343-018-7139-0.
160. Gustafsson, M.S.M.; Baird, M.E.; Ralph, P.J. the interchangeability of autotrophic and heterotrophic nitrogen sources in scleractinian coral symbiotic relationships: a numerical study. *Ecol. Modell.* 2013, 250, 183–194, doi:10.1016/j.ecolmodel.2012.11.003.
161. Gustafsson, S.M.; Baird, M.E.; Ralph, P.J. Modeling photoinhibition-driven bleaching in scleractinian coral as a function of light, temperature, and heterotrophy. *Limnol. Oceanogr.* 2014, 59, 603–622, doi:10.4319/lo.2014.59.2.0603.
162. Ha, M.-H.; Contardo-Jara, V.; Pflugmacher, S. Uptake of the cyanobacterial neurotoxin, anatoxin-a, and alterations in oxidative stress in the submerged aquatic plant *Ceratophyllum demersum*. *Ecotoxicol. Environ. Saf.* 2014, 101, 205–212, doi:10.1016/j.ecoenv.2013.12.023.
163. Häder, D.-P.; Helbling, E.W.; Williamson, C.E.; Worrest, R.C. Effects of UV radiation on aquatic ecosystems and interactions with climate change. *Photochem. Photobiol. Sci.* 2011, 10, 242–260, doi:10.1039/c0pp90036b.
164. Hammock, B.G.; Hobbs, J.A.; Slater, S.B.; Acuña, S.; Teh, S.J. Contaminant and food limitation stress in an endangered estuarine fish. *Sci. Total Environ.* 2015, 532, 316–326, doi:10.1016/j.scitotenv.2015.06.018.
165. Hampton, S.E.; Schindler, D.E. Empirical evaluation of observation scale effects in community time series. *Oikos* 2006, 113, 424–439, doi:10.1111/j.2006.0030-1299.14643.x.
166. Han, T.; Han, Y.-S.; Kain, J.M.; Häder, D.-P. Thallus differentiation of photosynthesis, growth, reproduction, and uv-b sensitivity in the green alga *Ulva pertusa* (chlorophyceae). *J. Psychol.* 2003, 39, 712–721, doi:10.1046/j.1529-8817.2003.02155.x.
167. Han, W.; Jing, Y.; Li, T. Compensatory growth in *Microcystis aeruginosa* after moderate high-temperature exposure. *J. Limnol.* 2015, 74, 549–558, doi:10.4081/jlimnol.2015.1164.
168. Hardikar, R.; Haridevi, C.K.; Ram, A.; Khandeparker, R.; Amberkar, U.; Chauhan, M. Inter-annual variability of phytoplankton assemblage and *Tetraspora Gelatinosa* bloom from anthropogenically affected harbour, Veraval, India. *Environ. Monit. Assess.* 2019, 191, 87, doi:10.1007/s10661-019-7192-y.
169. Hardison, D.R.; Sunda, W.G.; Shea, D.; Litaker, R.W. increased toxicity of *karenia brevis* during phosphate limited growth: ecological and evolutionary implications. *PLoS ONE* 2013, 8, e58545, doi:10.1371/journal.pone.0058545.

- 
170. Harley, P.C.; Monson, R.K.; Lerdau, M.T. Ecological and evolutionary aspects of isoprene emission from plants. *Oecologia* 1999, 118, 109–123, doi:10.1007/s004420050709.
171. Hauton, C.; Brown, A.; Thatje, S.; Mestre, N.C.; Bebianno, M.J.; Martins, I.; Bettencourt, R.; Canals, M.; Sanchez-Vidal, A.; Shillito, B.; et al. identifying toxic impacts of metals potentially released during deep-sea mining — a synthesis of the challenges to quantifying risk. *Front. Mar. Sci.* 2017, 4, 368, doi:10.3389/fmars.2017.00368.
172. Hazeem, L.J.; Yesilay, G.; Bououdina, M.; Perna, S.; Cetin, D.; Suludere, Z.; Barras, A.; Boukherroub, R. investigation of the toxic effects of different polystyrene micro-and nanoplastics on microalgae *Chlorella vulgaris* by analysis of cell viability, pigment content, oxidative stress and ultrastructural changes. *Mar. Pollut. Bull.* 2020, 156, 1–10, doi:10.1016/j.marpolbul.2020.111278.
173. He, S.; Hao, J.; Peng, W.; Qiu, P.; Li, C.; Guan, H. Modulation of lipid metabolism by deep-sea water in cultured human liver (HepG2) cells. *Mar. Biotechnol.* 2014, 16, 219–229, doi:10.1007/s10126-013-9540-1.
174. He, X.; Cheng, F.; Chen, W. Effects of maternal phosphorus deficiency on reproductive allocation of the copepod *Pseudodiaptomus annandalei* Sewell, 1919. *Hydrobiologia* 2020, 847, 2035–2048, doi:10.1007/s10750-020-04229-7.
175. He, Y.; Zhou, Q.-H.; Liu, B.-Y.; Cheng, L.; Tian, Y.; Zhang, Y.-Y.; Wu, Z.-B. Programmed cell death in the cyanobacterium *Microcystis aeruginosa* induced by allelopathic effect of submerged macrophyte *Myriophyllum spicatum* in co-culture system. *J. Appl. Phycol.* 2016, 28, 2805–2814, doi:10.1007/s10811-016-0814-7.
176. Heng, R.-L.; Pilon, L. Radiation characteristics and effective optical properties of dumbbell-shaped cyanobacterium *Synechocystis* Sp. *J. Quant. Spectrosc. Radiat. Transf.* 2016, 174, 65–78, doi:10.1016/j.jqsrt.2016.01.023.
177. Hernández Mancipe, L.E.; Londoño Velez, J.I.; Hernández García, K.A.; Torres Hernández, L.C. Los sistemas biofloc: una estrategia eficiente en la producción acuícola. *CES Medicina Veterinaria y Zootecnia*. 2019, 14, 70–99.
178. Hernando, M.; Schloss, I.R.; Almandoz, G.O.; Malanga, G.; Varela, D.E.; De Troch, M. combined effects of temperature and salinity on fatty acid content and lipid damage in antarctic phytoplankton. *J. Exp. Mar. Biol. Ecol.* 2018, 503, 120–128, doi:10.1016/j.jembe.2018.03.004.
179. Hernando, M.; Schloss, I.R.; Malanga, G.; Almandoz, G.O.; Ferreyra, G.A.; Aguiar, M.B.; Puntarulo, S. Effects of salinity changes on coastal Antarctic phytoplankton physiology and assemblage composition. *J. Exp. Mar. Biol. Ecol.* 2015, 466, 110–119, doi:10.1016/j.jembe.2015.02.012.
180. Hernando, M.; Varela, D.E.; Malanga, G.; Almandoz, G.O.; Schloss, I.R. Effects of climate-induced changes in temperature and salinity on phytoplankton physiology and stress responses in coastal Antarctica. *J. Exp. Mar. Biol. Ecol.* 2020, 530–531, 151400, doi:10.1016/j.jembe.2020.151400.
181. Hessen, D.; De Lange, H.; Van Donk, E. UV-induced changes in phytoplankton cells and its effects on grazers. *Freshw. Biol.* 1997, 38, 513–524, doi:10.1046/j.1365-2427.1997.00223.x.
182. Hiebenthal, C.; Philipp, E.E.R.; Eisenhauer, A.; Wahl, M. Effects of seawater PCO<sub>2</sub> and temperature on shell growth, shell stability, condition and cellular stress of western Baltic Sea *Mytilus edulis* (L.) and *Arctica islandica* (L.). *Mar. Biol.* 2013, 160, 2073–2087, doi:10.1007/s00227-012-2080-9.
183. Hirons, A.C.; Schell, D.M.; Finney, B.P. Temporal records of  $\delta^{13}\text{C}$  and  $\delta^{15}\text{N}$  in North Pacific pinnipeds: inferences regarding environmental change and diet. *Oecologia* 2001, 129, 591–601, doi:10.1007/s004420100756.
184. Hoadley, K.D.; Lewis, A.M.; Wham, D.C.; Pettay, D.T.; Grasso, C.; Smith, R.; Kemp, D.W.; LaJeunesse, T.C.; Warner, M.E. Host-symbiont combinations dictate the photo-physiological response of reef-building corals to thermal stress. *Sci. Rep.* 2019, 9, 1–15, doi:10.1038/s41598-019-46412-4.
185. Hoadley, K.D.; Pettay, D.T.; Grottoli, A.G.; Cai, W.-J.; Melman, T.F.; Levas, S.; Schoepf, V.; Ding, Q.; Yuan, X.; Wang, Y.; et al. High-temperature acclimation strategies within the thermally tolerant endosymbiont *Symbiodinium trenchii* and Its Coral Host, *Turbinaria reniformis*, Differ with Changing PCO<sub>2</sub> and Nutrients. *Mar. Biol.* 2016, 163, 134, doi:10.1007/s00227-016-2909-8.
186. Hoadley, K.D.; Pettay, Daniel.T.; Lewis, A.; Wham, D.; Grasso, C.; Smith, R.; Kemp, D.W.; LaJeunesse, T.; Warner, M.E. Different functional traits among closely related algal symbionts dictate stress endurance for vital indo-pacific reef-building corals. *Glob. Change Biol.* 2021, 27, 5295–5309, doi:10.1111/gcb.15799.
187. Holdt, S.L.; Kraan, S. Bioactive compounds in seaweed: functional food applications and legislation. *J. Appl. Phycol.* 2011, 23, 543–597, doi:10.1007/s10811-010-9632-5.
188. Hosseini Tafreshi, S.A.; Aghaie, P.; Toghyani, M.A.; Ramazani-Moghaddam-Arani, A. Improvement of Ionizing Gamma Irradiation Tolerance of *Chlorella vulgaris* by Pretreatment with Polyethylene Glycol. *Int. J. Radiat. Biol.* 2020, 96, 919–928, doi:10.1080/09553002.2020.1741717.
189. Hsieh, C.-J.; Zhan, S.H.; Liao, C.-P.; Tang, S.-L.; Wang, L.-C.; Watanabe, T.; Geraldino, P.J.L.; Liu, S.-L. The effects of contemporary selection and dispersal limitation on the community assembly of acidophilic microalgae. *J. Phycol.* 2018, 54, 720–733, doi:10.1111/jpy.12771.
190. Hu, H.; Hong, Y. Algal-bloom control by allelopathy of aquatic macrophytes — a review. *Front. Environ. Sci. Eng. China* 2008, 2, 421–438, doi:10.1007/s11783-008-0070-4.
191. Hu, X.; Yin, P.; Zhao, L.; Yu, Q. Characterization of cell viability in *Phaeocystis globosa* cultures exposed to marine algicidal bacteria. *Biotechnol. Bioproc. E.* 2015, 20, 58–66, doi:10.1007/s12257-014-0437-2.
192. Hu, X.; Zhou, J.; Liu, G.; Gui, B. Selection of microalgae for high CO<sub>2</sub> fixation efficiency and lipid accumulation from ten *Chlorella* Strains Using Municipal wastewater. *J. Environ. Sci.* 2016, 46, 83–91, doi:10.1016/j.jes.2015.08.030.



- 
193. Huntley, M.E.; Redalje, D.G. CO<sub>2</sub> mitigation and renewable oil from photosynthetic microbes: a new appraisal. *Mitig. Adapt. Strat. Glob. Chang* 2007, 12, 573–608, doi:10.1007/s11027-006-7304-1.
194. Huo, Z.; Guan, H.; Rbbani, M.G.; Xiao, Y.; Zhang, X.; Fan, C.; Li, Z.; Li, Y.; Wu, Q.; Yang, F.; et al. Effects of environmental factors on growth, survival, and metamorphosis of geoduck clam (*Panopea japonica* A. Adams, 1850) Larvae. *Aquac. Rep.* 2017, 8, 31–38, doi:10.1016/j.aqrep.2017.09.001.
195. Huovinen, P.; Gómez, I. Photosynthetic characteristics and UV stress tolerance of Antarctic seaweeds along the depth gradient. *Polar Biol.* 2013, 36, 1319–1332, doi:10.1007/s00300-013-1351-3.
196. Hussein, Z.N.; Hosseini Tafreshi, S.A.; Aghaie, P.; Toghyani, M.A. CaCl<sub>2</sub> pretreatment improves gamma toxicity tolerance in microalga *Chlorella vulgaris*. *Ecotoxicol. Environ. Saf.* 2020, 192, 110261, doi:10.1016/j.ecoenv.2020.110261.
197. Huysman, M.J.J.; Vyverman, W.; De Veylder, L. Molecular regulation of the diatom cell cycle. *J. Exp. Bot.* 2014, 65, 2573–2584, doi:10.1093/jxb/ert387.
198. Hyka, P.; Lickova, S.; Přibyl, P.; Melzoch, K.; Kovar, K. Flow cytometry for the development of biotechnological processes with microalgae. *Biotechnol. Adv.* 2013, 31, 2–16, doi:10.1016/j.biotechadv.2012.04.007.
199. Ianora, A.; Boersma, M.; Casotti, R.; Fontana, A.; Harder, J.; Hoffmann, F.; Pavia, H.; Potin, P.; Poulet, S.A.; Toth, G. New trends in marine chemical ecology. *Estuaries and Coasts: J. E.R.F.* 2006, 29, 531–551, doi:10.1007/BF02784281.
200. Ishika, T.; Laird, D.W.; Bahri, P.A.; Moheimani, N.R. Co-cultivation and stepwise cultivation of *Chaetoceros muelleri* and *Amphora* sp. for fucoxanthin production under gradual salinity increase. *J. Appl. Phycol.* 2019, 31, 1535–1544, doi:10.1007/s10811-018-1718-5.
201. Ivanina, A.V.; Sokolova, I.M. effects of cadmium exposure on expression and activity of p-glycoprotein in eastern oysters, *Crassostrea Virginica* Gmelin. *Aquat. Toxicol.* 2008, 88, 19–28, doi:10.1016/j.aquatox.2008.02.014.
202. Ivošević DeNardis, N.; Pečar Ilić, J.; Ružić, I.; Novosel, N.; Mišić Radić, T.; Weber, A.; Kasum, D.; Pavlinska, Z.; Balogh, R.K.; Hajdu, B.; et al. Algal cell response to laboratory-induced cadmium stress: a multimethod approach. *Eur. Biophys. J.* 2019, 48, 231–248, doi:10.1007/s00249-019-01347-6.
203. Ji, M.-K.; Kabra, A.N.; Choi, J.; Hwang, J.-H.; Kim, J.R.; Abou-Shanab, R.A.I.; Oh, Y.-K.; Jeon, B.-H. Biodegradation of bisphenol a by the freshwater microalgae *Chlamydomonas mexicana* and *Chlorella vulgaris*. *Ecol. Eng.* 2014, 73, 260–269, doi:10.1016/j.ecoleng.2014.09.070.
204. Jiang, J.; Shan, Z.; Wang, X.; Zhu, Y.; Zhou, J. Ecotoxicity of the nonsteroidal ecdysone mimic RH-5849 to *Daphnia magna*. *Environ. Sci. Pollut. Res.* 2018, 25, 10730–10739, doi:10.1007/s11356-018-1275-0.
205. Jiarpinijnun, A.; Benjakul, S.; Pornphatdetaudom, A.; Shibata, J.; Okazaki, E.; Osako, K. High Arachidonic acid levels in the tissues of herbivorous fish species (*Siganus fuscescens*, *Calotomus japonicus* and *Kyphosus bigibbus*). *Lipids* 2017, 52, 363–373, doi:10.1007/s11745-017-4244-3.
206. Jin, P.; González, G.; Agustí, S. Long-term exposure to increasing temperature can offset predicted losses in marine food quality (fatty acids) caused by ocean warming. *Evol. Appl.* 2020, 13, 2497–2506, doi:10.1111/eva.13059.
207. Joly, L.J.; Loots, C.; Meunier, C.L.; Boersma, M.; Collet, S.; Lefebvre, V.; Zambonino-Infante, J.-L.; Giraldo, C. Maturation of the digestive system of downs herring larvae (*Clupea harengus*, Linnaeus, 1758): Identification of Critical Periods through Ontogeny. *Mar. Biol.* 2021, 168, 82, doi:10.1007/s00227-021-03894-z.
208. Junaid, M.; Wang, J. Interaction of nanoplastics with extracellular polymeric substances (EPS) in the aquatic environment: a special reference to eco-corona formation and associated impacts. *Water Res.* 2021, 201, 117319, doi:10.1016/j.watres.2021.117319.
209. Jusoh, M.; Kasan, N.A.; Hashim, F.S.; Haris, N.; Zakaria, M.F.; Mohamed, N.N.; Rasdi, N.W.; Abd Wahid, M.E.; Katayama, T.; Takahashi, K. Isolation of freshwater and marine indigenous microalgae species from terengganu water bodies for potential uses as live feeds in aquaculture industry. *Int. Aquat. Res.* 2020, 12, doi:10.22034/iar(20).2020.671730.
210. Kagami, M.; De Bruin, A.; Ibelings, B.W.; Van Donk, E. Parasitic chytrids: their effects on phytoplankton communities and food-web dynamics. *Hydrobiologia* 2007, 578, 113–129, doi:10.1007/s10750-006-0438-z.
211. Kaggwa, M.N.; Gruber, M.; Oduor, S.O.; Schagerl, M. A detailed time series assessment of the diet of lesser flamingos: further explanation for their itinerant behaviour. *Hydrobiologia* 2013, 710, 83–93, doi:10.1007/s10750-012-1105-1.
212. Kang, C.; Kuba, T.; Hao, A.; Iseri, Y.; Li, C.; Zhang, Z. Oxidative stress responses of submerged macrophyte *Vallisneria asiatica* to different concentrations of cyanobacteria. *Chin. J. Ocean. Limnol.* 2015, 33, 364–371, doi:10.1007/s00343-015-4084-z.
213. Kasai, F.; Arts, M.T. The interactive effects of UV-B radiation and a herbicide on uptake and allocation of carbon in two strains of the green alga *Scenedesmus*. *Aquat. Ecol.* 1997, 31, 261–272, doi:10.1007/BF02493513.
214. Kathiresan, K. A Review of studies on Pichavaram mangrove, southeast India. *Hydrobiologia* 2000, 430, 185–205, doi:10.1023/A:1004085417093.
215. Kent, R.A.; Currie, D. Predicting algal sensitivity to a pesticide stress. *Environ. Toxicol. Chem.* 1995, 14, 983–991, doi:10.1002/etc.5620140609.
216. Khanam, M.R.M.; Shimasaki, Y.; Hosain, M.Z.; Mukai, K.; Tsuyama, M.; Qiu, X.; Tasmin, R.; Goto, H.; Oshima, Y. Diuron Causes Sinking Retardation and Physiochemical Alteration in Marine Diatoms *Thalassiosira pseudonana* and *Skeletonema marinoi-dohrnii* Complex. *Chemosphere* 2017, 175, 200–209, doi:10.1016/j.chemosphere.2017.02.054.

- 
217. Kharwar, S.; Mishra, A.K. Unraveling the complexities underlying sulfur deficiency and starvation in the cyanobacterium *Anabaena* sp. PCC 7120. *Environ. Exp. Bot.* 2020, 172, 103966, doi:10.1016/j.envexpbot.2019.103966.
218. Kilham, S.; Kreeger, D.; Goulden, C.; Lynn, S. Effects of nutrient limitation on biochemical constituents of *Ankistrodesmus falcatus*. *Freshw. Biol.* 1997, 38, 591–596, doi:10.1046/j.1365-2427.1997.00231.x.
219. Kim, B.-H.; Ramanan, R.; Kang, Z.; Cho, D.-H.; Oh, H.-M.; Kim, H.-S. *Chlorella sorokiniana* HS1, a novel freshwater green algal strain, grows and hyperaccumulates lipid droplets in seawater salinity. *Biomass and Bioenergy* 2016, 85, 300–305, doi:10.1016/j.biombioe.2015.12.026.
220. Kim, S.-K.; Ravichandran, Y.D.; Khan, S.B.; Kim, Y.T. Prospective of the cosmeceuticals derived from marine organisms. *Biotechnol. Bioproc. E.* 2008, 13, 511–523, doi:10.1007/s12257-008-0113-5.
221. Koftayan T, Milano J, Salazar G. Perfil de lípidos y ácidos grasos de *Perna viridis*, mejillón verde (Mollusca: Bivalvia) en el oriente venezolano y la costa oeste de Trinidad. *Rev. Biol. Trop.* 2011, 59, 171–82.
222. Korkaric, M.; Behra, R.; Fischer, B.B.; Junghans, M.; Eggen, R.I.L. Multiple stressor effects in *Chlamydomonas reinhardtii* – toward understanding mechanisms of interaction between effects of ultraviolet radiation and chemical pollutants. *Aquat. Toxicol.* 2015, 162, 18–28, doi:10.1016/j.aquatox.2015.03.001
223. Koukouzika, N.; Dimitriadis, V.K. Multiple biomarker comparison in *Mytilus Galloprovincialis* from the Greece coast: “lysosomal membrane stability, neutral red retention, micronucleus frequency and stress on stress.” *Ecotoxicology* 2005, 14, 449–463, doi:10.1007/s10646-004-1350-9.
224. Kozik, C.; Young, E.B.; Sandgren, C.D.; Berges, J.A. Cell death in individual freshwater phytoplankton species: relationships with population dynamics and environmental factors. *Eur. J. Phycol.* 2019, 54, 369–379, doi:10.1080/09670262.2018.1563216.
225. Krämer, W.E.; Caamaño-Ricken, I.; Richter, C.; Bischof, K. Dynamic regulation of photoprotection determines thermal tolerance of two phylotypes of *Symbiodinium* Clade A at Two Photon Fluence Rates: *J. Photochem. Photobiol. J. Photochem. Photobiol.* 2012, 88, 398–413, doi:10.1111/j.1751-1097.2011.01048.x.
226. Kress, N.; Adelung, D.; Herut, B.; Angel, D.L.; Eden, N.; Fiedler, U. Catalase activity in macro- and microorganisms as an indicator of biotic stress in coastal waters of the eastern Mediterranean Sea. *Helgol. Mar. Res.* 1999, 53, 209–218, doi:10.1007/s101520050025.
227. Krienitz, L.; Krienitz, D.; Dadheech, P.K.; Hübener, T.; Kotut, K.; Luo, W.; Teubner, K.; Versfeld, W.D. Food algae for lesser flamingos: a stocktaking. *Hydrobiologia* 2016, 775, 21–50, doi:10.1007/s10750-016-2706-x.
228. Kuhlenkamp, R.; Franklin, L.A.; Lüning, K. Effect of solar ultraviolet radiation on growth in the marine macroalga *Dictyota dichotoma* (Phaeophyceae) at Helgoland and its ecological consequences. *Helgol. Mar. Res.* 2001, 55, 77–86, doi:10.1007/s101520000060.
229. Kurashov, E.A.; Krylova, J.V.; Mitrukova, G.G.; Chernova, A.M. Low-molecular-weight metabolites of aquatic macrophytes growing on the territory of Russia and their role in hydroecosystems. *Contemp. Probl. Ecol.* 2014, 7, 433–448, doi:10.1134/S1995425514040064.
230. La Roche, J.; McKay, R.M.L.; Boyd, P. Immunological and molecular probes to detect phytoplankton responses to environmental stress in nature. In *molecular ecology of aquatic communities*; Zehr, J.P., Voytek, M.A., Eds.; Springer Netherlands: Dordrecht, 1999; pp. 177–198 ISBN 978-94-010-5827-8.
231. Ladino-Orjuela, G. Dinámica del carbono en estanques de peces. *Orinoquia*. 2011, 15, 48–61.
232. Lajmanovich, R.C. Interpretación ecológica de una comunidad larvaria de anfibios anuros. *Interciencia*. 2000, 25, 71–9.
233. LaPanse, A.J.; Krishnan, A.; Posewitz, M.C. Adaptive laboratory evolution for algal strain improvement: methodologies and applications. *Algal Res.* 2021, 53, 102122, doi:10.1016/j.algal.2020.102122.
234. Lari, Z.; Moradi-kheibari, N.; Ahmadzadeh, H.; Abrishamchi, P.; Moheimani, N.R.; Murry, M.A. Bioprocess engineering of microalgae to optimize lipid production through nutrient management. *J. Appl. Phycol.* 2016, 28, 3235–3250, doi:10.1007/s10811-016-0884-6.
235. Lavoie, I.; Hamilton, P.B.; Morin, S.; Kim Tiam, S.; Kahlert, M.; Gonçalves, S.; Falasco, E.; Fortin, C.; Gontero, B.; Heudre, D.; et al. Diatom teratologies as biomarkers of contamination: are all deformities ecologically meaningful? *Ecol. Indic.* 2017, 82, 539–550, doi:10.1016/j.ecolind.2017.06.048.
236. Le Croizier, G.; Schaal, G.; Gallon, R.; Fall, M.; Le Grand, F.; Munaron, J.-M.; Rouget, M.-L.; Machu, E.; Le Loc’h, F.; Laë, R.; et al. Trophic ecology influence on metal bioaccumulation in marine fish: inference from stable isotope and fatty acid analyses. *Sci. Total Environ.* 2016, 573, 83–95, doi:10.1016/j.scitotenv.2016.08.035.
237. Lebeau, T.; Robert, J.-M. Diatom cultivation and biotechnologically relevant products. part I: cultivation at various scales. *Appl. Microbiol. Biotechnol.* 2003, 60, 612–623, doi:10.1007/s00253-002-1176-4.
238. Lee, S.; Fadel, J.G.; Haller, L.Y.; Verhille, C.E.; Fangue, N.A.; Hung, S.S.O. Effects of feed restriction on salinity tolerance in white sturgeon (*Acipenser transmontanus*). *Comp. Biochem. Physiol. Part A Mol. Integr. Physiol.* 2015, 188, 156–167, doi:10.1016/j.cbpa.2015.06.027.
239. Legendre, L.; Yentsch, C.M. Overview of flow cytometry and image analysis in biological oceanography and limnology. *Cytometry* 1989, 10, 501–510, doi:10.1002/cyto.990100505.
240. Leitão, M.A.D.S.; Cardozo, K.H.M.; Pinto, E.; Colepicolo, P. PCB-induced oxidative stress in the unicellular marine dinoflagellate *Lingulodinium polyedrum*. *Arch. Environ. Contam. Toxicol.* 2003, 45, 59–65, doi:10.1007/s00244-002-0208-5.

- 
241. Lelong, A.; Hégaret, H.; Soudant, P.; Bates, S.S. *Pseudo-nitzschia* (Bacillariophyceae) species, domoic acid and amnesic shellfish poisoning: revisiting previous paradigms. *Phycologia* 2012, 51, 168–216, doi:10.2216/11-37.1.
242. Lengyel, E.; Lázár, D.; Trájer, A.J.; Stenger-Kovács, C. climate change projections for Carpathian soda pans on the basis of photosynthesis evidence from typical diatom species. *Sci. Total Environ.* 2020, 710, 136241, doi:10.1016/j.scitotenv.2019.136241.
243. Lesser, M.P. Using energetic budgets to assess the effects of environmental stress on corals: are we measuring the right things? *Coral Reefs* 2013, 32, 25–33, doi:10.1007/s00338-012-0993-x.
244. Levin, R.A.; Beltran, V.H.; Hill, R.; Kjelleberg, S.; McDougald, D.; Steinberg, P.D.; Van Oppen, M.J.H. Sex, scavengers, and chaperones: transcriptome secrets of divergent *Symbiodinium thermal* tolerances. *Mol. Biol. Evol.* 2016, 33, 2201–2215, doi:10.1093/molbev/msw119.
245. Li, G.; Campbell, D.A. Rising CO<sub>2</sub> interacts with growth light and growth rate to alter photosystem II photoinactivation of the coastal diatom *Thalassiosira pseudonana*. *PLoS ONE* 2013, 8, e55562, doi:10.1371/journal.pone.0055562.
246. Li, H.; Yao, J.; Duran, R.; Liu, J.; Min, N.; Chen, Z.; Zhu, X.; Zhao, C.; Ma, B.; Pang, W.; et al. Toxic response of the freshwater green algae *Chlorella pyrenoidosa* to combined effect of flotation reagent butyl xanthate and nickel. *Environ. Pollut.* 2021, 286, 117285, doi:10.1016/j.envpol.2021.117285.
247. Li, Y.; Cui, D.; Zhuo, P.; Zhang, L.; Sun, X.; Xu, N. A New Approach to promote astaxanthin accumulation via Na<sub>2</sub>WO<sub>4</sub> in *Haematococcus pluvialis*. *J. Ocean. Limnol.* 2019, 37, 176–185, doi:10.1007/s00343-018-7317-0.
248. Li, Z.; Li, W.; Zhang, Y.; Hu, Y.; Sheward, R.; Irwin, A.J.; Finkel, Z.V. Dynamic photophysiological stress response of a model diatom to ten environmental stresses. *J. Phycol.* 2021, 57, 484–495, doi:10.1111/jpy.13072.
249. Liang, D.; Wang, X.; Huo, Y.; Wang, Y.; Li, S. Differences between solitary cells and colonial cells in the heteromorphic life cycle of *Phaeocystis globosa*: morphology, physiology, and transcriptome. *J. Ocean Univ. China* 2021, 20, 939–948, doi:10.1007/s11802-021-4684-5.
250. Liang, Y.; Su, Y.; Ouyang, K.; Chen, X.; Yang, J. Effects of microcystin-producing and microcystin-free *Microcystis aeruginosa* on enzyme activity and nutrient content in the rotifer *Brachionus calyciflorus*. *Environ. Sci. Pollut. Res.* 2017, 24, 10430–10442, doi:10.1007/s11356-017-8704-3.
251. Liang, Y.; Yang, X.; Wang, Y.; Liu, R.; Gu, H.; Mao, L. Influence of polystyrene microplastics on rotifer (*Brachionus calyciflorus*) growth, reproduction, and antioxidant responses. *Aquat. Ecol.* 2021, 55, 1097–1111, doi:10.1007/s10452-021-09885-y.
252. Limates V, Cuevas V, Tajolosa MA, Benigno E. Phytoplankton abundance and distribution in selected sites of Boracay Island, Malay, Aklan, Central Philippines. *J.E.S.A.M.* 2016, 1–14, doi:10.47125/jesam/2016\_sp2/01.
253. Lin, S.; Litaker, R.W.; Sunda, W.G. phosphorus physiological ecology and molecular mechanisms in marine phytoplankton. *J. Phycol.* 2016, 52, 10–36, doi:10.1111/jpy.12365.
254. Liñán-Cabello, M.A.; Olivos-Ortiz, A.; Quijano-Scheggia, S.; Anguiano, D.M.; Reséndiz-Flores, M.L.; Ortega-Ortiz, C.D.. Effects of terrestrial runoff on the coral communities in Santiago Bay, Colima, Mexican Pacific Coast. *Rev. Biol. Trop.* 2016, 64, 1185–200.
255. Arts, M.T.; Wainman, B.C. *Lipids in freshwater ecosystems*. Springer New York: New York, NY, 1999; ISBN 978-1-4612-6813-0.
256. Lista M, Velásquez C, Prieto A, Longart Y. Esfuerzo reproductivo, índice de engorde y rendimiento de Arca zebra (Filibranchia: Arcidae) por talla y su asociación con variables ambientales, Sucre, Venezuela. *Rev. Biol. Trop.* 2016, 64, 617–33.
257. Liu, C.; Shi, X.; Wu, F.; Ren, M.; Gao, G.; Wu, Q. Genome analyses provide insights into the evolution and adaptation of the eukaryotic picophytoplankton *Mychonastes homosphaera*. *BMC Genomics* 2020, 21, 477, doi:10.1186/s12864-020-06891-6.
258. Liu, G.; Feng, Q.; Shen, J.; Yu, J.; He, W.; Algeo, T.J. Decline of siliceous sponges and spicule miniaturization induced by marine productivity collapse and expanding anoxia during the permian-triassic crisis in south china. *PALAIOS* 2014, 28, 664–679, doi:10.2110/palo.2013.p13-035r.
259. Liu, J.; Yin, P.; Zhao, L. Adverse effect of TiO<sub>2</sub> Nanoparticles on antioxidant system and antitumor activities of macroalgae *Gracilaria lemaneiformis*. *J. Ocean Univ. China* 2019, 18, 1130–1138, doi:10.1007/s11802-019-3819-4.
260. Liu, Q.; Zhang, G.; Ding, J.; Zou, H.; Shi, H.; Huang, C. Evaluation of the removal of potassium cyanide and its toxicity in green algae (*Chlorella vulgaris*). *Bull. Environ. Contam. Toxicol.* 2018, 100, 228–233, doi:10.1007/s00128-017-2208-1.
261. Liu, S.; Guo, Z.; Li, T.; Huang, H.; Lin, S. photosynthetic efficiency, cell volume, and elemental stoichiometric ratios in *Thalassiosira weissflogii* under phosphorus limitation. *Chin. J. Ocean. Limnol.* 2011, 29, 1048–1056, doi:10.1007/s00343-011-0224-2.
262. Liu, X.; Xie, N.; Bai, M.; Li, J.; Wang, G. Composition change and decreased diversity of microbial eukaryotes in the coastal upwelling waters of South China Sea. *Sci. Total Environ.* 2021, 795, 148892, doi:10.1016/j.scitotenv.2021.148892.
263. Liu, Y.; Chen, T.; Song, S.; Li, C. Variation in biochemical composition during encystment of the planktonic dinoflagellate *Akashiwo sanguinea* in N-limited cultures. *Mar. Biol.* 2019, 166, 120, doi:10.1007/s00227-019-3569-2.
264. Liu, Y.; Liu, Y.; Jiao, D.; Lu, C.; Lou, Y.; Li, N.; Wang, G.; Wang, H. Synthesis and release of fatty acids under the interaction of *Ulva pertusa* and *Heterosigma akashiwo* by stable isotope analysis. *Ecotoxicol. Environ. Saf.* 2021, 210, 111852, doi:10.1016/j.ecoenv.2020.111852.
265. Lo Giudice, A.; Fani, R. Cold-adapted bacteria from a coastal area of the ross sea (Terra Nova Bay, Antarctica): linking microbial ecology to biotechnology. *Hydrobiologia* 2015, 761, 417–441, doi:10.1007/s10750-015-2497-5.

- 
266. Lombardi, A.T.; Wangersky, P.J. particulate lipid class composition of three marine phytoplankters *Chaetoceros fragilis*, *Isochrysis galbana* (Tahiti) and *Dunaliella tertiolecta* grown in batch culture. *Hydrobiologia* 1995, 306, 1–6, doi:10.1007/BF00007853.
267. Lozano, J.L. Interacciones sociedad-naturaleza en Mazatlán, Sinaloa. región y sociedad. 1997, 8, 99-123. <https://doi.org/10.22198/rys.1997.13-14.a1138>
268. Lugioyo, G.M.; Loza, S.; Abreu, P.C. Biomass distribution of heterotrophic and autotrophic microorganisms of the photic layer in Cuban southern oceanic waters. *Rev. Biol. Trop.* 2007, 55, 449-57.
269. Luna, L.M. Microalgas: Aspectos ecológicos y biotecnológicos. *Rev. Cub. Quim.* 2007, 19, 3-20.
270. Lv, M.; Tang, X.; Zhao, Y.; Li, J.; Zhang, B.; Li, L.; Jiang, Y.; Zhao, Y. The toxicity, bioaccumulation and debromination of BDE-47 and BDE-209 in *Chlorella sp.* under multiple exposure modes. *Sci. Total Environ.* 2020, 723, 138086, doi:10.1016/j.scitotenv.2020.138086.
271. Hassanein, H.M.; Banhawly, M.A.; Soliman, F.M.; Abdel-Rehim, S.A.; Müller, W.E.; Schröder, H.C. Induction of Hsp70 by the herbicide oxyfluorfen (Goal) in the Egyptian Nile fish, *Oreochromis niloticus*. *Arch. Environ. Contam. Toxicol.* 1999, 37, 78–84, doi:10.1007/s002449900492.
272. Ma, D.; Li, Y.; Fu, H. Effect of High Temperature on the balance between photosynthetic light absorption and energy utilization in *Chlorella pyrenoidosa* (Chlorophyceae). *J. Ocean. Limnol.* 2020, 38, 186–194, doi:10.1007/s00343-019-8369-5.
273. Ma, Z.; Shang, T.; Zhang, T.; Chen, B.; Dai, X.; Zhao, M. Effects of bloom-forming species dinoflagellate *Karenina mikimotoi* on the development and photosynthetic characteristics of the sexually propagated embryos of macroalga *Sargassum fusiformis*. *J. Appl. Phycol.* 2020, 32, 1263–1273, doi:10.1007/s10811-019-02011-4.
274. Macdonald, J.A.; Montgomery, J.C. Thermal Limits of neuromuscular function in an Antarctic Fish. *J. Comp. Physiol.* 1982, 147, 237–250, doi:10.1007/BF00609848.
275. Madariaga, I. Short-term variations in the physiological state of phytoplankton [2pt] in a shallow temperate estuary. *Hydrobiologia* 2002, 475/476, 345–358, doi:10.1023/A:1020391425989.
276. Malavé, C.J.; Prieto Arcas, A.S. Producción de biomasa en el mejillon verde de localidad de la Península de Araya, Venezuela. *Interciencia.* 2005, 30, 699-705.
277. Mancera-Rodríguez, N.J.; Álvarez-León, R. Estado del conocimiento de las concentraciones de mercurio y otros metales pesados en peces dulceacuicolas de Colombia. *Acta Biol. Colomb.* 2006, 11, 3-23.
278. Marazzi, L.; Gaiser, E.E.; Tobias, F.A.C. Phosphorus scarcity and desiccation stress increase the occurrence of dominant taxa in wetland benthic primary producer communities. *Aquat. Ecol.* 2017, 51, 571–589, doi:10.1007/s10452-017-9637-0.
279. Marcogliese, D.J.; Blaise, C.; Cyr, D.; De Lafontaine, Y.; Fournier, M.; Gagné, F.; Gagnon, C.; Hudon, C. Effects of a major municipal effluent on the St. Lawrence River: a case study. *AMBIO* 2015, 44, 257–274, doi:10.1007/s13280-014-0577-9.
280. Martin, R.M.; Moniruzzaman, M.; Stark, G.F.; Gann, E.R.; Derminio, D.S.; Wei, B.; Hellweger, F.L.; Pinto, A.; Boyer, G.L.; Wilhelm, S.W. Episodic decrease in temperature increases mcx gene transcription and cellular microcystin in continuous cultures of *Microcystis aeruginosa* PCC 7806. *Front. Microbiol.* 2020, 11, 601864, doi:10.3389/fmicb.2020.601864.
281. Martin-Jezequel, V.; Hildebrand, M.; Brzezinski, M.A. Silicon metabolism in diatoms: implications for growth. *J. Phycol.* 2000, 36, 821–840, doi:10.1046/j.1529-8817.2000.00019.x.
282. Masmoudi, S.; Tastard, E.; Guermazi, W.; Caruso, A.; Morant-Manceau, A.; Ayadi, H. Salinity gradient and nutrients as major structuring factors of the phytoplankton communities in Salt Marshes. *Aquat. Ecol.* 2015, 49, 1–19, doi:10.1007/s10452-014-9500-5.
283. Masojídek, J.; Prášil, O. The development of microalgal biotechnology in the Czech Republic. *J. Ind. Microbiol. Biotechnol.* 2010, 37, 1307–1317, doi:10.1007/s10295-010-0802-x.
284. Masojídek, J.; Ranglová, K.; Lakatos, G.E.; Silva Benavides, A.M.; Torzillo, G. variables governing photosynthesis and growth in microalgae mass cultures. *Processes* 2021, 9, 820, doi:10.3390/pr9050820.
285. Mayzaud, P.; Boutoute, M.; Gasparini, S.; Mousseau, L. Lipids and fatty acid composition of particulate matter in the north atlantic: importance of spatial heterogeneity, season and community structure. *Mar. Biol.* 2014, 161, 1951–1971, doi:10.1007/s00227-014-2476-9.
286. Meave del Castillo, M.E.; Zamudio-Resendiz, M.E. Planktonic algal blooms from 2000 to 2015 in Acapulco Bay, Guerrero, Mexico. *Acta Bot. Mex.* 2018, 125, 61-93. DOI: 10.21829/ abm125.2018.1316
287. Medina-Sánchez, J.M.; Herrera, G.; Durán, C.; Villar-Argaiz, M.; Carrillo, P. Optode use to evaluate microbial planktonic respiration in oligotrophic ecosystems as an indicator of environmental stress. *Aquat. Sci.* 2017, 79, 529–541, doi:10.1007/s00027-016-0515-y.
288. Mensens, C.; De Laender, F.; Janssen, C.R.; Sabbe, K.; De Troch, M. Different response-effect trait relationships underlie contrasting responses to two chemical stressors. *J. Ecol.* 2017, 105, 1598–1609, doi:10.1111/1365-2745.12777.
289. Meseck, S.L.; Li, Y.; Sunila, I.; Dixon, M.; Clark, P.; Lipsky, C.; Stevens, J.R.; Music, P.; Wikfors, G.H. Characterizing seston in the Penobscot River Estuary. *Mar. Environ. Res.* 2017, 131, 43–56, doi:10.1016/j.marenvres.2017.09.010.
290. Mies, M.; Chaves-Filho, A.B.; Miyamoto, S.; Güth, A.Z.; Tenório, A.A.; Castro, C.B.; Pires, D.O.; Calderon, E.N.; Sumida, P.Y.G. Production of three symbiosis-related fatty acids by *Symbiodinium* types in clades a–f associated with marine invertebrate larvae. *Coral Reefs* 2017, 36, 1319–1328, doi:10.1007/s00338-017-1627-0.

- 
291. Míguez, D. Tecnologías de control de floraciones de cianobacterias y algas nocivas en cuerpos de agua, con énfasis en el uso de irradiación por ultrasonido. *Innotec*. 2016, 54-61.
292. Míguez, L.; Esperanza, M.; Seoane, M.; Cid, Á. assessment of cytotoxicity biomarkers on the microalga *Chlamydomonas reinhardtii* exposed to emerging and priority pollutants. *Ecotoxicol. Environ. Saf.* 2021, 208, 111646, doi:10.1016/j.ecoenv.2020.111646.
293. Milan, M.; Palazzo, F.; Papetti, C.; Grotta, L.; Marchetti, S.; Patarnello, T.; Bargelloni, L.; Martino, G. Transcriptomic profiling of *Chamelea gallina* from sites along the Abruzzo coast (Italy), subject to periodic localized mortality events. *Mar. Biol.* 2016, 163, 196, doi:10.1007/s00227-016-2971-2.
294. Mixson Byrd, S.; Burkholder, J.M.; Zimba, P.V. environmental stressors and lipid production by *Dunaliella* spp. I. Salinity. *J. Exp. Mar. Biol. Ecol.* 2017, 487, 18–32, doi:10.1016/j.jembe.2016.11.004.
295. Mladineo, I.; Peharda, M.; Orhanović, S.; Bolotin, J.; Pavela-Vrančić, M.; Treursić, B. The reproductive cycle, condition index and biochemical composition of the horse-bearded mussel *Modiolus barbatus*. *Helgol. Mar. Res.* 2007, 61, 183–192, doi:10.1007/s10152-007-0065-8.
296. Moczyłowska, M.; Landing, E.; Zang, W.; Palacios, T. Proterozoic phytoplankton and timing of chlorophyte algae origins: proterozoic phytoplankton. *Palaeontology* 2011, 54, 721–733, doi:10.1111/j.1475-4983.2011.01054.x.
297. Mogollón, J.; Vásquez, G.; Troccol, L.; Villalba, W.; Crescini, R. Aspectos biológicos básicos de *Pinctada imbricata* (Bivalvia: Pteriidae) en la laguna de La Restinga, isla de Margarita, Venezuela. *Rev. Mar. Cost.* 2015, 7, 117-32.
298. Mohammady, N.G.-E.D.; Chen, Y.-C.; El-Mahdy, A.-E.-R.A.; Mohammad, R.F. Temporal alterations of *Nannochloropsis salina* (Eustigmatophyceae) grown under aqueous diesel fuel stress. *J. Appl. Phycol.* 2005, 17, 161–170, doi:10.1007/s10811-005-5510-y.
299. Moll, K.M.; Gardner, R.D.; Eustance, E.O.; Gerlach, R.; Peyton, B.M. combining multiple nutrient stresses and bicarbonate addition to promote lipid accumulation in the diatom RGD-1. *Algal Research* 2014, 5, 7–15, doi:10.1016/j.algal.2014.04.002.
300. Morales, M.; Aflalo, C.; Bernard, O. Microalgal lipids: a review of lipids potential and quantification for 95 phytoplankton species. *Biomass and Bioenergy* 2021, 150, 106108, doi:10.1016/j.biombioe.2021.106108.
301. Moreau, M.F.; Surico-Bennett, J.; Vicario-Fisher, M.; Crane, D.; Gerads, R.; Gersberg, R.M.; Hurlbert, S.H. Contaminants in tilapia (*Oreochromis mossambicus*) from the Salton Sea, California, in relation to human health, piscivorous birds and fish meal production. *Hydrobiologia* 2007, 576, 127–165, doi:10.1007/s10750-006-0299-5.
302. Moreira, R.A.; Rocha, G.S.; Da Silva, L.C.M.; Goulart, B.V.; Montagner, C.C.; Melão, M.D.G.G.; Espindola, E.L.G. Exposure to environmental concentrations of fipronil and 2,4-D mixtures causes physiological, morphological and biochemical changes in *Raphidocelis subcapitata*. *Ecotoxicol. Environ. Saf.* 2020, 206, 111180, doi:10.1016/j.ecoenv.2020.111180.
303. Moreno, A.R.; Martiny, A.C. Ecological stoichiometry of ocean plankton. *Annu. Rev. Mar. Sci.* 2018, 10, 43–69, doi:10.1146/annurev-marine-121916-063126.
304. Moreno-Ruiz, J.L.; Tapia-García, M.; González-Macias, M.D.; Figueroa-Torres, M.G. Fitoplancton del río Tehuantepec, Oaxaca, México y algunas relaciones biogeográficas. *Rev. Biol. Trop.* 2008, 56, 27-54.
305. Mostofa, K.M.G.; Liu, C.; Pan, X.; Yoshioka, T.; Vione, D.; Minakata, D.; Gao, K.; Sakugawa, H.; Komissarov, G.G. Photosynthesis in nature: a new look. In *Photobiogeochemistry of Organic Matter*; Mostofa, K.M.G., Yoshioka, T., Mottaleb, A., Vione, D., Eds.; Environmental Science and Engineering; Springer Berlin Heidelberg: Berlin, Heidelberg, 2013; pp. 561–686 ISBN 978-3-642-32222-8.
306. Msanne, J.; Xu, D.; Konda, A.R.; Casas-Mollano, J.A.; Awada, T.; Cahoon, E.B.; Cerutti, H. Metabolic and gene expression changes triggered by nitrogen deprivation in the photoautotrophically grown microalgae *Chlamydomonas reinhardtii* and *Coccomyxa* sp. C-169. *Phytochemistry* 2012, 75, 50–59, doi:10.1016/j.phytochem.2011.12.007.
307. Mummert, A.; Newcomb, T.J.; Neves, R.J.; Parker, B. Evaluation of a recirculating pond system for rearing juvenile freshwater mussels at White Sulphur Springs National Fish Hatchery, West Virginia, USA. *Am. Malacol. Bull.* 2006, 21, 1-10.
308. Mutanda, T.; Ramesh, D.; Karthikeyan, S.; Kumari, S.; Anandraj, A.; Bux, F. bioprospecting for hyper-lipid producing microalgal strains for sustainable biofuel production. *Bioresour. Technol.* 2011, 102, 57–70, doi:10.1016/j.biortech.2010.06.077.
309. Nakov, T.; Judy, K.J.; Downey, K.M.; Ruck, E.C.; Alverson, A.J. transcriptional response of osmolyte synthetic pathways and membrane transporters in a euryhaline diatom during long-term acclimation to a salinity Gradient. *J. Phycol.* 2020, 56, 1712–1728, doi:10.1111/jpy.13061.
310. Neury-Ormanni, J.; Vedrenne, J.; Morin, S. Benthic Diatom Growth Kinetics under Combined Pressures of Microalgal Competition, Predation and Chemical Stressors. *Sci. Total Environ.* 2020, 734, 139484, doi:10.1016/j.scitotenv.2020.139484.
311. Ni, L.; Acharya, K.; Hao, X.; Li, S. Isolation and identification of an anti-algal compound from *Artemisia annua* and mechanisms of inhibitory effect on algae. *Chemosphere* 2012, 88, 1051–1057, doi:10.1016/j.chemosphere.2012.05.009.
312. Nicolosi Gelis, M.M.; Cocherio, J.; Donadelli, J.; Gómez, N. Exploring the use of nuclear alterations, motility and ecological guilds in epipellic diatoms as biomonitoring tools for water quality improvement in urban impacted lowland streams. *Ecol. Indic.* 2020, 110, 105951, doi:10.1016/j.ecolind.2019.105951.
313. Nicolosi Gelis, M.M.; Mujica, M.A.; Pecile, A.; Donadelli, J.; Simonetti, M.; Gómez, N.; Cocherio, J. Diatom motility and nuclear alterations are affected by sediment elutriates of agricultural streams. *Ecotoxicol. Environ. Saf.* 2020, 205, 111322, doi:10.1016/j.ecoenv.2020.111322.
314. Obertegger, U.; Camin, F.; Guella, G.; Flaim, G. Adaptation of a psychrophilic freshwater dinoflagellate to ultraviolet radiation N1. *J. Psychol.* 2011, 47, 811–820, doi:10.1111/j.1529-8817.2011.01025.x.

- 
315. Ochoa, C.A. Protocolo para la cría de biomasa de *Artemia* adulta en raceways. Rev. AquaTIC. 2004, 8-15.
316. Odić, D.; Turk, V.; Stopar, D. Environmental stress determines the quality of bacterial lysate and its utilization efficiency in a simple microbial loop. Microb. Ecol. 2007, 53, 639–649, doi:10.1007/s00248-006-9143-8.
317. Oku, O.; Kamatani, A. resting spore formation and phosphorus composition of the marine diatom *Chaetoceros pseudocurvisetus* under Various Nutrient Conditions. Mar. Biol. 1995, 123, 393–399, doi:10.1007/BF00353630.
318. Oliveira, M.; Amorim, A. Microbial forensics: new breakthroughs and future prospects. Appl. Microbiol. Biotechnol. 2018, 102, 10377–10391, doi:10.1007/s00253-018-9414-6.
319. Orbea, A.; Marigómez, I.; Fernández, C.; Tarazona, J.V.; Cancio, I.; Cajaraville, M.P. Structure of peroxisomes and activity of the marker enzyme catalase in digestive epithelial cells in relation to pah content of mussels from two Basque Estuaries (Bay of Biscay): seasonal and site-specific variations. Arch. Environ. Contam. Toxicol. 1999, 36, 158–166, doi:10.1007/s002449900456.
320. Ortiz-Moreno, M.L.; Cortés-Castillo, C.E.; Sánchez-Villarraga, J.; Padilla, J.; Otero-Paternina, A.M. Evaluación del crecimiento de la microalga *Chlorella sorokiniana* en diferentes medios de cultivo en condiciones autotróficas y mixotróficas. Orinoquia. 2012 Jun;16(1):11-20.
321. Pacheco, O.M.; Parra-Bracamonte, G.M.; de la Rosa-Reyna, X.F.; Ambriz-Morales, M.S. Genes candidatos para mejorar la deposición de ácidos grasos en carne de bagre de canal (*Ictalurus punctatus*). Rev. AquaTIC. 2018, 51, 1-5.
322. Paerl, H.W.; Pinckney, J.L. A mini-review of microbial consortia: their roles in aquatic production and biogeochemical cycling. Microb. Ecol. 1996, 31, doi:10.1007/BF00171569.
323. Pandey, L.K.; Bergey, E.A. Exploring the status of motility, lipid bodies, deformities and size reduction in periphytic diatom community from chronically metal (Cu, Zn) polluted waterbodies as a biomonitoring tool. Sci. Total Environ. 2016, 550, 372–381, doi:10.1016/j.scitotenv.2015.11.151.
324. Pandey, L.K.; Bergey, E.A.; Lyu, J.; Park, J.; Choi, S.; Lee, H.; Depuydt, S.; Oh, Y.-T.; Lee, S.-M.; Han, T. The Use of diatoms in ecotoxicology and bioassessment: insights, advances and challenges. Water Res. 2017, 118, 39–58, doi:10.1016/j.watres.2017.01.062.
325. Parrish, C.C.; Wells, J.S.; Yang, Z.; Dabinett, P. Growth and lipid composition of scallop juveniles, *Placopecten magellanicus*, Fed the flagellate *Isochrysis galbana* with varying lipid composition and the diatom *Chaetoceros muelleri*. Mar. Biol. 1999, 133, 461–471, doi:10.1007/s002270050486.
326. Pastrana Franco, O.; Santafé Patiño, G.; Sánchez Romero, E. Perfil lipídico y ensayos de las actividades antioxidante, insecticida y antialimentaria de la esponja marina *Iotrochota birotulata* (Iotrochotidae: Demospongiae). Rev. Biol. Trop. 2019, 67, 213-23.
327. Patra, J.K.; Mohanta, Y.K. Antimicrobial compounds from mangrove plants: a pharmaceutical prospective. Chin. J. Integr. Med. 2014, 20, 311–320, doi:10.1007/s11655-014-1747-0.
328. Paul, S.; Bravo Vázquez, L.A.; Márquez Nafarrate, M.; Gutiérrez Reséndiz, A.I.; Srivastava, A.; Sharma, A. The regulatory activities of microRNAs in non-vascular plants: a mini review. Planta 2021, 254, 57, doi:10.1007/s00425-021-03707-z.
329. Pearson, T.H. Marine Pollution Effects of Pulp and Paper Industry Wastes. Helgol. Mar. Res. 1980, 33, 340–365, doi:10.1007/BF02414760.
330. Peck, L.S.; Clark, M.S.; Clarke, A.; Cockell, C.S.; Convey, P.; Detrich, H.W.; Fraser, K.P.P.; Johnston, I.A.; Methe, B.A.; Murray, A.E.; et al. Genomics: applications to Antarctic ecosystems. Polar Biol. 2005, 28, 351–365, doi:10.1007/s00300-004-0671-8.
331. Pereira, N.; Shilova, I.N.; Zehr, J.P. Molecular markers define progressing stages of phosphorus limitation in the nitrogen-fixing cyanobacterium, *Crocospaera*. J. Phycol. 2016, 52, 274–282, doi:10.1111/jpy.12396.
332. Pérez, L.; Barrera, R.; Asturiano, J.F.; Jover, M. Producción de anguilas: pasado, presente y futuro. Rev. AquaTIC. 2004, 51-78.
333. Perin, S.; Lean, D.R. The effects of ultraviolet-b radiation on freshwater ecosystems of the arctic: influence from stratospheric ozone depletion and climate change. Environ. Rev. 2004, 12, 1–70, doi:10.1139/a04-003.
334. Perozzi, L.F.; Ortiz, M.M.; López, E.L. Efecto del agua del embalse De la Vega en la lipoperoxidación y los niveles de la acetilcolinesterasa en el hígado y en el músculo de *Xiphophorus helleri*. R.I.C.A. 2003, 19, 145-55.
335. Perrier, F.; Baudrimont, M.; Mornet, S.; Mesmer-Dudons, N.; Lacomme, S.; Etcheverria, B.; Simon, O.; Feurtet-Mazel, A. Gold nanoparticle trophic transfer from natural biofilm to grazer fish. Gold Bull. 2018, 51, 163–173, doi:10.1007/s13404-018-0241-4.
336. Photosynthesis Directory. Photosyn. Res. 1989, 18, 1–75, doi:10.1007/BF00155283.
337. Photosynthesis research: abstracts of the 12th international congress on photosynthesis. Photosynthesis Res. 2001, 69, 1–279, doi:10.1023/A:1017486013323.
338. Pichierri, S.; Pezzolesi, L.; Vanucci, S.; Totti, C.; Pistocchi, R. Inhibitory effect of polyunsaturated aldehydes (PUAs) on the growth of the toxic benthic dinoflagellate *Ostreopsis Cf. ovata*. Aquat. Toxicol. 2016, 179, 125–133, doi:10.1016/j.aquat-tox.2016.08.018.
339. Pinto, R.; Vilarinho, R.; Carvalho, A.P.; Moreira, J.A.; Guimarães, L.; Oliva-Teles, L. Raman spectroscopy applied to diatoms (microalgae, bacillariophyta): prospective use in the environmental diagnosis of freshwater ecosystems. Water Res. 2021, 198, 117102, doi:10.1016/j.watres.2021.117102.
340. Piotrowska-Niczyporuk, A.; Bajguz, A.; Talarek, M.; Bralska, M.; Zambrzycka, E. the effect of lead on the growth, content of primary metabolites, and antioxidant response of green alga *Acutodesmus obliquus* (Chlorophyceae). Environ. Sci. Pollut. Res. 2015, 22, 19112–19123, doi:10.1007/s11356-015-5118-y.

- 
341. Pittera, J.; Humily, F.; Thorel, M.; Grulois, D.; Garczarek, L.; Six, C. Connecting thermal physiology and latitudinal niche partitioning in marine *Synechococcus*. *ISME J.* 2014, 8, 1221–1236, doi:10.1038/ismej.2013.228.
342. Plenary Lectures. *Photosyn. Res.* 1995, 43, 1–241, doi:10.1007/BF00144142.
343. Pradhan, B.; Patra, S.; Dash, S.R.; Nayak, R.; Behera, C.; Jena, M. Evaluation of the anti-bacterial activity of methanolic extract of *Chlorella vulgaris* Beyerinck [Beijerinck] with special reference to antioxidant modulation. *Futur. J. Pharm. Sci.* 2021, 7, 17, doi:10.1186/s43094-020-00172-5.
344. Prado, R.; Rioboo, C.; Herrero, C.; Cid, Á. screening acute cytotoxicity biomarkers using a microalga as test organism. *Ecotoxicol. Environ. Saf.* 2012, 86, 219–226, doi:10.1016/j.ecoenv.2012.09.015.
345. Prado, R.; Rioboo, C.; Herrero, C.; Suárez-Bregua, P.; Cid, Á. Flow cytometric analysis to evaluate physiological alterations in herbicide-exposed *Chlamydomonas moewusii* cells. *Ecotoxicology* 2012, 21, 409–420, doi:10.1007/s10646-011-0801-3.
346. Prieto, A.I.; Atencio, L.; Puerto, M.; Pichardo, S.; Jos, A.; Moreno, I.; Cameán, A.M. Efectos tóxicos producidos por las microcistinas en peces. *Rev. Toxicol.* 2008, 25, 22–31.
347. Prieto, M.J.; De la Cruz, L.; Morales, M. Cultivo experimental del cladocero *Moina* sp alimentado con *Ankistrodesmus* sp y *Saccharomyces cerevisiae*. *Rev. MVZ Córdoba* 2006, 11, 705–14.
348. Prieto, M.J.; Mogollon, M.J.; Castro, A.L.; Sierra, L.A. Efecto del medio y condiciones de cultivo en la productividad de tres diatomeas marinas con potencial acuícola. *Rev. MVZ Córdoba*. 2005, 11, 705–714.
349. Proceedings of the VII. Alps-Adria Scientific Workshop, 28 April–2 May 2008, Stara Lesna, Slovakia. Part I. *Cereal Res. Commun.* 2008, 36, 1–674, doi:10.1556/CRC.36.2008.Suppl.1.
350. Proceedings of the VII. Alps-Adria Scientific Workshop, 28 April–2 May 2008, Stara Lesna, Slovakia. Part II. *Cereal Res. Commun.* 2008, 36, 675–1394, doi:10.1556/CRC.36.2008.Suppl.2.
351. Provasoli, L.; Conklin, D.E.; D’Agostino, A.S. Factors inducing fertility in aseptic crustacea. *Helgolander Wiss. Meeresunters* 1970, 20, 443–454, doi:10.1007/BF01609920.
352. Przytulska, A.; Bartosiewicz, M.; Rautio, M.; Dufresne, F.; Vincent, W.F. climate effects on high latitude *Daphnia* via food quality and thresholds. *PLoS ONE* 2015, 10, e0126231, doi:10.1371/journal.pone.0126231.
353. Rada CA, Ramírez-Merlano JA, Jiménez-Forero JA. Uso de fertilizante comercial en la cinética celular de *Desmodesmus opoliensis* (Chlorophyceae), reporte preliminar. *Orinoquia*. 2016, 20, 18–25.
354. Rädercker, N.; Raina, J.-B.; Pernice, M.; Perna, G.; Guagliardo, P.; Kilburn, M.R.; Aranda, M.; Voolstra, C.R. Using *Aiptasia* as a model to study metabolic interactions in Cnidarian-Symbiodinium Symbioses. *Front. Physiol.* 2018, 9, 214, doi:10.3389/fphys.2018.00214.
355. Rakhi, S.F.; Reza, A.H.M.M.; Hossen, M.S.; Hossain, Z. Alterations in histopathological features and brain acetylcholinesterase activity in stinging catfish *Heteropneustes fossilis* exposed to polluted river water. *Int Aquat. Res.* 2013, 5, 7, doi:10.1186/2008-6970-5-7.
356. Ratha, S.K.; Prasanna, R. bioprospecting microalgae as potential sources of “green energy” — challenges and perspectives (review). *Appl. Biochem. Microbiol.* 2012, 48, 109–125, doi:10.1134/S000368381202010X.
357. Redalje, D.G.; Laws, E.A. The effects of environmental factors on growth and the chemical and biochemical composition of marine diatoms. I. Light and temperature effects. *J. Exp. Mar. Biol. Ecol.* 1983, 68, 59–79, doi:10.1016/0022-0981(83)90013-8.
358. Redha, A.; Al-Hasan, R.; Jose, J.; Saju, D.; Afzal, M. The photosynthetic apparatus of *Conocarpus lancifolius* Engl. (Combretaceae) suffers damage in soil contaminated with heavy metals. *Botany* 2019, 97, 179–189, doi:10.1139/cjb-2018-0047.
359. Rehakova, K.; Capkova, K.; Hrouzek, P.; Koblizek, M.; Dolezal, J. microbial photosynthetic and photoprotective pigments in himalayan soils originating from different elevations and successional stages. *Soil Biol. Biochem.* 2019, 132, 153–164, doi:10.1016/j.soilbio.2019.02.008.
360. Renzi, M.; Roselli, L.; Giovani, A.; Focardi, S.E.; Basset, A. Early warning tools for ecotoxicity assessment based on *Phaeodactylum tricornutum*. *Ecotoxicology* 2014, 23, 1055–1072, doi:10.1007/s10646-014-1249-z.
361. Rijstenbil, J.W. Assessment of oxidative stress in the planktonic diatom *Thalassiosira pseudonana* in response to UVA and UVB radiation. *J. Plankton Res.* 2002, 24, 1277–88. <https://doi.org/10.1093/plankt/24.12.1277>
362. Rijstenbil, J.W.; Derksen, J.W.M.; Gerringa, L.J.A.; Poortvliet, T.C.W.; Sandee, A.; Van Den Berg, M.; Van Drie, J.; Wijnholds, J.A. Oxidative Stress Induced by Copper: Defense and damage in the marine planktonic diatom *Ditylum brightwellii*, grown in continuous cultures with high and low zinc levels. *Mar. Biol.* 1994, 119, 583–590, doi:10.1007/BF00354321.
363. Ríos MV, Guzmán-Guillén R, Prieto AI, Moreno IM, Cameán AM. Alteración de biomarcadores de estrés oxidativo en Tilapia (*Oreochromis niloticus*) expuesta a dosis repetidas de Cilindrospermopsina por diferentes vías de exposición. *Rev. Toxicol.* 2013, 30, 149–60.
364. Rizwan, Muhammad; Mujtaba, Ghulam; Lee, Kisay Effects of multiple stress factors including iron supply on cell growth and lipid accumulation in marine microalga *Dunaliella tertiolecta*. *Appl. Chem. Eng.* 2017, 28, 306–312, doi:10.14478/ACE.2017.1018.
365. Rocha, G.S.; Parrish, C.C.; Lombardi, A.T.; Da Graça Gama Melão, M. Biochemical and physiological responses of *Selenastrum gracile* (chlorophyceae) acclimated to different phosphorus concentrations. *J. Appl. Phycol.* 2018, 30, 2167–2177, doi:10.1007/s10811-018-1418-1.

- 
366. Rodríguez Martínez, R.; Suescún Otero, G. Aplicaciones e inconvenientes de la técnica Hibridación in situ Fluorescente (FISH) en la identificación de microorganismos. *Revista Salud Uninorte* 2013, 29, 327-40.
367. Rodríguez, L.; Juscamaita, J.; Vargas, J. Efecto del medio em-bokashi en el cultivo de la microalga Marina *tetraselmis suecica* k. *Ecol. Apl.* 2007, 6, 111-6.
368. Rodríguez-Núñez, K.; Toledo, P.; Arias, S. Aislamiento de dos especies de diatomeas con potencial acuícolas (Bacillariophyceae) en el Pacífico de Costa Rica. *UNED Research Journal* 2016, 8, 93–98, [doi.org/10.22458/urj.v8i1.1228](https://doi.org/10.22458/urj.v8i1.1228).
369. Roiha, T.; Tirola, M.; Cazzanelli, M.; Rautio, M. Carbon quantity defines productivity while its quality defines community composition of bacterioplankton in subarctic ponds. *Aquat. Sci.* 2012, 74, 513–525, [doi:10.1007/s00027-011-0244-1](https://doi.org/10.1007/s00027-011-0244-1).
370. Roleda, M.Y. Photosynthetic Response of Arctic Kelp zoospores exposed to radiation and thermal stress. *Photochem. Photobiol. Sci.* 2009, 8, 1302–1312, [doi:10.1039/b901098j](https://doi.org/10.1039/b901098j).
371. Ros, M.; Camp, E.F.; Hughes, D.J.; Crosswell, J.R.; Warner, M.E.; Leggat, W.P.; Suggett, D.J. Unlocking the black-box of inorganic carbon-uptake and utilization strategies among coral endosymbionts (Symbiodiniaceae). *Limnol. Oceanogr.* 2020, 65, 1747–1763, [doi:10.1002/lno.11416](https://doi.org/10.1002/lno.11416).
372. Rosales-Loaiza N, Guevara M, Lodeiros C, Morales E. Crecimiento y producción de metabolitos de la cianobacteria marina *Synechococcus* sp.(Chroococcales) en función de la irradiancia. *Rev. Biol. Trop.* 2008, 56, 421-9.
373. Roy, S. Distributions of phytoplankton carbohydrate, protein and lipid in the world oceans from satellite ocean colour. *ISME J.* 2018, 12, 1457–1472, [doi:10.1038/s41396-018-0054-8](https://doi.org/10.1038/s41396-018-0054-8).
374. Ruiz-González, C.; Simó, R.; Sommaruga, R.; Gasol, J.M. Away from darkness: a review on the effects of solar radiation on heterotrophic bacterioplankton activity. *Front. Microbiol.* 2013, 4, [doi:10.3389/fmicb.2013.00131](https://doi.org/10.3389/fmicb.2013.00131).
375. Runcie, J.W.; Ritchie, R.J.; Larkum, A.W.D. Uptake Kinetics and Assimilation of Phosphorus by *Catenella Nipae* and *Ulva Lactuca* Can Be Used to Indicate Ambient Phosphate Availability. *J. Appl. Phycol.* 2004, 16, 181–194, [doi:10.1023/B:JAPH.0000048504.76029.b4](https://doi.org/10.1023/B:JAPH.0000048504.76029.b4).
376. Ryu, J.-C. Special Issue: Abstracts of the 4th International Conference on Environmental Health Science, 27–28 October 2011, Incheon Korea: Advanced Technology in Environmental Health Sciences and Risk Assessment — Including Nanomaterial Safety October 27 (Thu)–28 (Fri), 2011 HYATT Regency Incheon, Korea. *Toxicol. Environ. Health Sci.* 2011, 3, 1–88, [doi:10.1007/s13530-011-0098-x](https://doi.org/10.1007/s13530-011-0098-x).
377. S.M. Gustafsson, M.; Baird, M.E.; Ralph, P.J. Modeling photoinhibition-driven bleaching in *Scleractinia* coral as a function of light, temperature, and heterotrophy. *Limnol. Oceanogr.* 2014, 59, 603–622, [doi:10.4319/lo.2014.59.2.0603](https://doi.org/10.4319/lo.2014.59.2.0603).
378. Sajjadi, B.; Chen, W.Y.; Raman, A.A.; Ibrahim, S. Microalgae lipid and biomass for biofuel production: a comprehensive review on lipid enhancement strategies and their effects on fatty acid composition. *Renew. Sust. Energ. Rev.* 2018, 97, 200–232, [doi:10.1016/j.rser.2018.07.050](https://doi.org/10.1016/j.rser.2018.07.050).
379. Salmaso, N.; Mosello, R. Limnological research in the deep southern subalpine lakes: synthesis, directions and Perspectives. *Adv. Oceanogr. Limnol.* 2010, 1, 29–66, [doi:10.1080/19475721003735773](https://doi.org/10.1080/19475721003735773).
380. Samuels, T.; Rynearson, T.A.; Collins, S. Surviving heatwaves: thermal experience predicts life and death in a southern ocean diatom. *Front. Mar. Sci.* 2021, 8, 1-16 <https://doi.org/10.1101/2020.08.25.264028>
381. Torres, H.; Juscamaita-Morales, J.; Vargas-Cárdenas, J.; Oliveros-Ramos, R. Producción de la microalga *Nannochloropsis oculata* (Droop) Hibberd en medios enriquecidos con ensilado biológico de pescado. *Ecol. Apl.* 2008, 7, 149-58.
382. Sandgren, CraigD. Chrysophyte Reproduction and Resting Cysts: A Paleolimnologist's Primer. *J. Paleolimnol.* 1991, 5, 1-9 [doi:10.1007/BF00226555](https://doi.org/10.1007/BF00226555).
383. Sangmanee, K.; Casareto, B.E.; Nguyen, T.D.; Sangsawang, L.; Toyoda, K.; Suzuki, T.; Suzuki, Y. Influence of thermal stress and bleaching on heterotrophic feeding of two Scleractinian Corals on Pico-Nanoplankton. *Mar. Pollut. Bull.* 2020, 158, 111405, [doi:10.1016/j.marpolbul.2020.111405](https://doi.org/10.1016/j.marpolbul.2020.111405).
384. Sánchez-Santos, A.L.; Gomes, N.C.M.; Henriques, I.; Almeida, A.; Correia, A.; Cunha, Â. growth conditions influence UVB sensitivity and oxidative damage in an estuarine bacterial isolate. *Photochem. Photobiol. Sci.* 2013, 12, 974–986, [doi:10.1039/c3pp25353h](https://doi.org/10.1039/c3pp25353h).
385. Santos, A.L.; Henriques, I.; Gomes, N.C.M.; Almeida, A.; Correia, A.; Cunha, A. Effects of ultraviolet radiation on the abundance, diversity and activity of bacterioneuston and bacterioplankton: insights from microcosm studies. *Aquat. Sci.* 2011, 73, 63–77, [doi:10.1007/s00027-010-0160-9](https://doi.org/10.1007/s00027-010-0160-9).
386. Sanz-Luque, E.; Bhaya, D.; Grossman, A.R. Polyphosphate: a multifunctional metabolite in cyanobacteria and algae. *Front. Plant Sci.* 2020, 11, 938, [doi:10.3389/fpls.2020.00938](https://doi.org/10.3389/fpls.2020.00938).
387. Sardans, J.; Rivas-Ubach, A.; Peñuelas, J. The elemental stoichiometry of aquatic and terrestrial ecosystems and its relationships with organismic lifestyle and ecosystem structure and function: a review and perspectives. *Biogeochemistry* 2012, 111, 1–39, [doi:10.1007/s10533-011-9640-9](https://doi.org/10.1007/s10533-011-9640-9).
388. Sargian, P.; Pelletier, É.; Mostajir, B.; Ferreyra, G.A.; Demers, S. TBT toxicity on a natural planktonic assemblage exposed to enhanced ultraviolet-B radiation. *Aquat. Toxicol.* 2005, 73, 299–314, [doi:10.1016/j.aquatox.2005.03.019](https://doi.org/10.1016/j.aquatox.2005.03.019).
389. Sarker, N.K.; Salam, P.A. Design of batch algal cultivation systems and ranking of the design parameters. *Energ. Ecol. Environ.* 2020, 5, 196–210, [doi:10.1007/s40974-020-00149-3](https://doi.org/10.1007/s40974-020-00149-3).



- 
390. Scanlan, D.J.; Wilson, W.H. Application of molecular techniques to addressing the role of P as a key effector in marine ecosystems. *Hydrobiologia* 1999, 401, 149–175. <https://doi.org/10.1023/A:1003742528262>
391. Schimmelmann, A.; Tegner, M.J. Historical oceanographic events reflected in 13 C/ 12 c ratio of total organic carbon in laminated santa barbara basin sediment. *Global Biogeochem. Cycles* 1991, 5, 173–188, doi:10.1029/91GB00382.
392. Schlichter, D.; Brendelberger, H. Plasticity of the scleractinian body plan: Functional morphology and trophic specialization of *Mycedium elephantotus* (Pallas, 1766). *Facies* 1998, 39, 227–241, doi:10.1007/BF02537018.
393. Scholz, B.; Vyverman, W.; Küpper, F.C.; Ólafsson, H.G.; Karsten, U. effects of environmental parameters on Chytrid infection prevalence of four marine diatoms: a laboratory case study. *Botanica Marina* 2017, 60, 419–431, doi:10.1515/bot-2016-0105.
394. Seoane, M.; Esperanza, M.; Rioboo, C.; Herrero, C.; Cid, Á. Flow cytometric assay to assess short-term effects of personal care products on the marine microalga *Tetraselmis suecica*. *Chemosphere* 2017, 171, 339–347, doi:10.1016/j.chemosphere.2016.12.097.
395. Sestak, Z.; Catsky, J. Bibliography of reviews and methods of photosynthesis - 89. *Photosynth.* 2005, 43, 621–640, doi:10.1007/s11099-005-0098-7.
396. Sestak, Z.; Catsky, J. Bibliography of reviews and methods of photosynthesis-90. *Photosynth.* 2006, 44, 627–640, doi:10.1007/s11099-006-0082-x.
397. Severin, T.; Erdner, D.L. The phytoplankton taxon-dependent oil response and its microbiome: correlation but not causation. *Front. Microbiol.* 2019, 10, 385, doi:10.3389/fmicb.2019.00385.
398. Shamsudin, L. Seasonal variation of fatty acid content in natural microplankton from the Tumpat Coastal Waters of the South China Sea. *Archives of Physiology and Biochemistry* 1998, 106, 253–260, doi:10.1076/apab.106.3.253.4381.
399. Sheath, R.G. Seasonality of Phytoplankton in northern tundra ponds. *Hydrobiologia* 1986, 138, 75–83, doi:10.1007/BF00027233.
400. Shukla, S.; Rajta, A.; Setia, H.; Bhatia, R. Simultaneous nitrification–denitrification by phosphate accumulating microorganisms. *World J. Microbiol. Biotechnol.* 2020, 36, 151, doi:10.1007/s11274-020-02926-y.
401. Sigee, D.C.; Bahrami, F.; Estrada, B.; Webster, R.E.; Dean, A.P. The influence of phosphorus availability on carbon allocation and p quota in *Scenedesmus subspicatus*: a synchrotron-based FTIR analysis. *Phycologia* 2007, 46, 583–592, doi:10.2216/07-14.1.
402. Singh, M.P.V.V.B.; Prasad, S.M.; Singh, V.P.; Singh, M. antioxidant system against active oxygen species in cyanobacterium *Aphanothece stagnina*: response to excess light under cadmium stress. *Proc. Natl. Acad. Sci., India, Sect. B Biol. Sci.* 2015, 85, 535–543, doi:10.1007/s40011-014-0367-y.
403. Singh, S.P.; Singh, P. Effect of temperature and light on the growth of algae species: a review. *Renew. Sust. Energ. Rev.* 2015, 50, 431–444, doi:10.1016/j.rser.2015.05.024.
404. Six, C.; Sherrard, R.; Lionard, M.; Roy, S.; Campbell, D.A. Photosystem II and pigment dynamics among ecotypes of the green alga *Ostreococcus*. *Plant Physiol.* 2009, 151, 379–390, doi:10.1104/pp.109.140566.
405. Sjöberg, J. 60TH ASMS Conference on Mass Spectrometry and Allied Topics: May 20 - 24, 2012 Vancouver, Canada. *J. Am. Soc. Mass Spectrom.* 2012, 23, 1–252, doi:10.1007/s13361-012-0381-3.
406. Sjöberg, J. 64TH ASMS Conference on Mass Spectrometry and Allied Topics. *J. Am. Soc. Mass Spectrom.* 2016, 27, 1–266, doi:10.1007/s13361-016-1413-1.
407. Skjoldal H.R.; Båmstedt U. Ecobiochemical studies on the deep-water pelagic Community of Korsfjorden, Western Norway. *Adenine Nucleotides in Zooplankton. Mar. Biol.* 1977, 42, 197–211, doi:10.1007/BF00397744.
408. Soares, L.S.H.; Arantes, L.P.L.; Pucci, M.C.J. Food web of a subtropical tidal flat, Atlantic Southwestern: temporal and spatial variability of the primary organic sources. *Ocean Coast Manag.* 2018, 164, 104–114, doi:10.1016/j.ocecoaman.2018.01.035.
409. Somogyi, B.; Felföldi, T.; V.-Balogh, K.; Boros, E.; Pálffy, K.; Vörös, L. the role and composition of winter picoeukaryotic assemblages in shallow Central European Great Lakes. *J. Great Lakes Res.* 2016, 42, 1420–1431, doi:10.1016/j.jglr.2016.10.003.
410. Spalletti LA, Schwarz E, Veiga GD. Geoquímica inorgánica como indicador de procedencia y ambiente sedimentario en sucesiones de lutitas negras: los depósitos transgresivos titonianos (Formación Vaca Muerta) de la Cuenca Neuquina, Argentina. *Andean geol.* 2014, 41, 401–35, doi: 10.5027/andgeoV41n2-a07.
411. Special Issue: Abstracts of the 6th International Conference on Environmental Health Science, 29–30 October 2013, Incheon, Korea: Advanced Technology in Environmental Health Sciences and Environmental Diseases. *Toxicol. Environ. Health Sci.* 2013, 5, 1–82, doi:10.1007/s13530-013-0171-8.
412. Stankovic, S.; Kalaba, P.; Stankovic, A.R. Biota as toxic metal indicators. *Environ. Chem. Lett.* 2014, 12, 63–84, doi:10.1007/s10311-13-0430-6.
413. Streit, B. Bioaccumulation processes in ecosystems. *Experientia* 1992, 48, 955–970, doi:10.1007/BF01919142.
414. Subashchandrabose, S.R.; Megharaj, M.; Venkateswarlu, K.; Naidu, R. Interaction effects of polycyclic aromatic hydrocarbons and heavy metals on a soil microalga, *Chlorococcum* sp. MM11. *Environ. Sci. Pollut. Res.* 2015, 22, 8876–8889, doi:10.1007/s11356-13-1679-9.
415. Swart, K.A.; Oleynik, S.; Martínez-García, A.; Haug, G.H.; Sigman, D.M. Correlation between the Carbon Isotopic Composition of planktonic foraminifera-bound organic matter and surface water PCO<sub>2</sub> across the Equatorial Pacific. *Geochim. Cosmochim. Acta* 2021, 306, 281–303, doi:10.1016/j.gca.2021.03.007.
416. Sylvander, P.; Häubner, N.; Snoeijjs, P. The thiamine content of phytoplankton cells is affected by abiotic stress and growth rate. *Microb. Ecol.* 2013, 65, 566–577, doi:10.1007/s00248-012-0156-1.

- 
417. Tamminen, M.; Betz, A.; Pereira, A.L.; Thali, M.; Matthews, B.; Suter, M.J.-F.; Narwani, A. Proteome evolution under non-substitutable resource limitation. *Nat Commun* 2018, 9, 4650, doi:10.1038/s41467-018-07106-z.
418. Téllez A.A, Rodríguez S.S, Camacho M.C. Mecanismos de resistencia a metales tóxicos (Cd) bajo variaciones abióticas en microalgas. *Tip rev. espec. cienc.* 2017, 21, 40-52.
419. Thangaraj, S.; Palanisamy, S.K.; Zhang, G.; Sun, J. quantitative proteomic profiling of marine diatom *Skeletonema Dohrnii* in response to temperature and silicate induced environmental stress. *Front. Microbiol.* 2021, 11, 554832, doi:10.3389/fmicb.2020.554832.
420. Tidou, A.S.; Yapi, A.D.; Kouamé, V.K.; Aoussi, S.; Williams, D.E. Histological analysis of the impact of lagoon pollution on *Chrysichthys nigrodigitatus* from cote d'Ivoire. *Bull Environ Contam Toxicol* 2012, 89, 44–52, doi:10.1007/s00128-012-0617-8.
421. Tillmann, U.; Rick, H.-J. North Sea Phytoplankton: A review. *Senckenbergiana maritima* 2003, 33, 1–69, doi:10.1007/BF03043047.
422. Tivey, T.R.; Parkinson, J.E.; Weis, V.M. Host and symbiont cell cycle coordination is mediated by symbiotic state, nutrition, and partner identity in a model cnidarian-dinoflagellate symbiosis. *mBio.* 2020, 11, e02626-19, doi:10.1128/mBio.02626-19.
423. Tokushima, H.; Inoue-Kashino, N.; Nakazato, Y.; Masuda, A.; Ifuku, K.; Kashino, Y. advantageous characteristics of the diatom *Chaetoceros gracilis* as a Sustainable Biofuel Producer. *Biotechnol. Biofuels* 2016, 9, 2-19, doi:10.1186/s13068-016-0649-0.
424. Topçu, N.E.; Pérez, T.; Grégori, G.; Harmelin-Vivien, M. *In situ* investigation of *Spongia officinalis* (Demospongiae) particle feeding: coupling flow cytometry and stable isotope analysis. *J. Exp. Mar. Biol. Ecol.* 2010, 389, 61–69, doi:10.1016/j.jembe.2010.03.017.
425. Tourón N, Sonnenholzner J, Panchana M. Manual de cultivo integral del erizo de mar tropical (*Tripneustes depressus*). *Rev. AquaTIC.* 2020, 15-33.
426. Traunspurger, W.; Drews, C. Toxicity analysis of freshwater and marine sediments with meio- and macrobenthic organisms: a review. *Hydrobiologia* 1996, 328, 215–261, doi:10.1007/BF00017632.
427. Travieso J.C. Ácidos grasos omega-3 y prevención cardiovascular. *Rev. CENIC, Cienc. biol.* 2010, 41, 3-15.
428. Tremblay, P.; Naumann, M.; Sikorski, S.; Grover, R.; Ferrier-Pagès, C. Experimental assessment of organic carbon fluxes in the scleractinian coral *Stylophora pistillata* during a thermal and photo stress event. *Mar. Ecol. Prog. Ser.* 2012, 453, 63–77, doi:10.3354/meps09640.
429. Ulloa, P.E.; Iturra, P.; Neira, R.; Araneda, C. Zebrafish as a model organism for nutrition and growth: towards comparative studies of nutritional genomics applied to aquacultured fishes. *Rev. Fish Biol. Fisheries* 2011, 21, 649–666, doi:10.1007/s11160-011-9203-0.
430. United Nations Environment Programme, Environmental Effects Assessment Panel Environmental Effects of Ozone Depletion and Its Interactions with Climate Change: Progress Report, 2009. *Photochem. Photobiol. Sci.* 2010, 9, 275–294, doi:10.1039/b923342n.
431. United Nations Environment Programme, Environmental Effects Assessment Panel Environmental Effects of Ozone Depletion and Its Interactions with Climate Change: Progress Report, 2015. *Photochem. Photobiol. Sci.* 2016, 15, 141–174, doi:10.1039/c6pp90004f.
432. United Nations Environment Programme, Environmental Effects Assessment Panel Environmental Effects of Ozone Depletion and Its Interactions with Climate Change: Progress Report, 2016. *Photochem. Photobiol. Sci.* 2017, 16, 107–145, doi:10.1039/c7pp90001e.
433. United Nations Environment Programme; Environmental Effects Assessment Panel Environmental Effects of Ozone Depletion and Its Interactions with Climate Change: Progress Report, 2007. *Photochem. Photobiol. Sci.* 2008, 7, 15–27, doi:10.1039/b717166h.
434. Vadadi-Fülöp, C.; Sipkay, C.; Mészáros, G.; Hufnagel, L. climate change and freshwater zooplankton: what does it boil down To? *Aquat. Ecol.* 2012, 46, 501–519, doi:10.1007/s10452-012-9418-8.
435. Van Der Oost, R.; Beyer, J.; Vermeulen, N.P.E. Fish bioaccumulation and biomarkers in environmental risk assessment: a review. *Environ. Toxicol. Pharmacol.* 2003, 13, 57–149, doi:10.1016/S1382-6689(02)00126-6.
436. Vardi, A.; Eisenstadt, D.; Murik, O.; Berman-Frank, I.; Zohary, T.; Levine, A.; Kaplan, A. Synchronization of cell death in a dinoflagellate population is mediated by an excreted thiol protease. *Environ Microbiol* 2007, 9, 360–369, doi:10.1111/j.1462-2920.2006.01146.x.
437. Vargas, C.A.; Manríquez, P.H.; Navarrete, S.A. Feeding by larvae of intertidal invertebrates: assessing their position in pelagic food webs. *Ecology* 2006, 87, 444–457, doi:10.1890/05-0265.
438. Vaulot, D.; Birrien, J.-L.; Marie, D.; Casotti, R.; Veldhuis, M.J.W.; Kraay, G.W.; Chretiennot-Dinet, M.-J. Morphology, ploidy, pigment composition, and genome size of cultured strains of phaeocystis (prymnesiophyceae). *J. Phycol.* 1994, 30, 1022–1035, doi:10.1111/j.0022-3646.1994.01022.x.
439. Vega C., Rodolfo A. Suporte nutricional em enfermidade pulmonar. *Investig. andina.* 2010, 12, 71-86.
440. Verity, P.G.; Brussaard, C.P.; Nejstgaard, J.C.; Van Leeuwe, M.A.; Lancelot, C.; Medlin, L.K. current understanding of phaeocystis ecology and biogeochemistry, and perspectives for future research. *biogeochemistry* 2007, 83, 311–330, doi:10.1007/s10533-007-9090-6.
441. Verity, P.G.; Smayda, T.J. Nutritional value of *Phaeocystis pouchetii* (Prymnesiophyceae) and other phytoplankton for *Acartia* Spp. (Copepoda): ingestion, egg production, and growth of nauplii. *Mar. Biol.* 1989, 100, 161–171, doi:10.1007/BF00391955.

- 
442. Viant, M.R.; Sommer, U. Mass Spectrometry Based Environmental Metabolomics: A Primer and Review. *Metabolomics* 2013, 9, 144–158, doi:10.1007/s11306-012-0412-x.
443. Villa, F.C.; Sampson, A.O.; Ortega, M.G. Los condicionantes del desarrollo Turístico del Lago de Chapala y su Ribera. *Quivera. Revista de Estudios Territoriales* 2007, 9, 195–229.
444. Vineetha, G.; Karati, K.K.; Raveendran, T.V.; Idrees Babu, K.K.; Riyas, C.; Muhsin, M.I.; Shihab, B.K.; Simson, C.; Anil, P. Responses of the zooplankton community to peak and waning periods of El Niño 2015–2016 in Kavaratti Reef Ecosystem, Northern Indian Ocean. *Environ. Monit. Assess.* 2018, 190, 465, doi:10.1007/s10661-018-6842-9.
445. Vu, H.P.; Nguyen, L.N.; Zdarta, J.; Nga, T.T.V.; Nghiem, L.D. Blue-green algae in surface water: problems and opportunities. *Curr. Pollution. Rep.* 2020, 6, 105–122, doi:10.1007/s40726-020-00140-w.
446. Wang, S.Y.; Stickle, W.B. Biochemical composition of the blue crab *Callinectes sapidus* exposed to the water-soluble fraction of crude oil. *mar. biol.* 1988, 98, 23–30, doi:10.1007/bf00392655.
447. Wang, W.; Shen, H.; Shi, P.; Chen, J.; Ni, L.; Xie, P. Experimental evidence for the role of heterotrophic bacteria in the formation of *Microcystis* colonies. *J. Appl. Phycol.* 2016, 28, 1111–1123, doi:10.1007/s10811-015-0659-5.
448. Weber, A.K.; Pirow, R. Physiological responses of *Daphnia pulex* to acid stress. *BMC Physiol.* 2009, 9, 9, doi:10.1186/1472-6793-9-9.
449. Wells, M.L.; Trainer, V.L.; Smayda, T.J.; Karlson, B.S.O.; Trick, C.G.; Kudela, R.M.; Ishikawa, A.; Bernard, S.; Wulff, A.; Anderson, D.M.; et al. Harmful algal blooms and climate change: learning from the past and present to forecast the future. *Harmful Algae* 2015, 49, 68–93, doi:10.1016/j.hal.2015.07.009.
450. Welsh, D.T. Ecological Significance of Compatible solute accumulation by micro-organisms: from single cells to global climate. *fems Microbiol. Rev.* 2000, 24, 263–290, doi:10.1111/j.1574-6976.2000.tb00542.x.
451. Whitfield, A.K.; Panfili, J.; Durand, J.-D. A global review of the cosmopolitan flathead mullet *Mugil cephalus* Linnaeus 1758 (Teleostei: Mugilidae), with emphasis on the biology, genetics, ecology and fisheries aspects of this apparent species complex. *Rev. Fish Biol. Fisheries* 2012, 22, 641–681, doi:10.1007/s11160-012-9263-9.
452. Wiens, M.; Luckas, B.; Brümmer, F.; Shokry, M.; Ammar, A.; Steffen, R.; Batel, R.; Diehl-Seifert, B.; Schröder, H.; Müller, W. Okadaic acid: a potential defense molecule for the sponge *Suberites domuncula*. *Mar. Biol.* 2003, 142, 213–223, doi:10.1007/s00227-002-0886-6.
453. Wilhelm, C.; Büchel, C.; Fisahn, J.; Goss, R.; Jakob, T.; LaRoche, J.; Lavaud, J.; Lohr, M.; Riebesell, U.; Stehfest, K.; et al. The regulation of carbon and nutrient assimilation in diatoms is significantly different from green algae. *Protist* 2006, 157, 91–124, doi:10.1016/j.protis.2006.02.003.
454. Wolfe, K.; Anthony, K.; Babcock, R.C.; Bay, L.; Bourne, D.G.; Burrows, D.; Byrne, M.; Deaker, D.J.; Diaz-Pulido, G.; Frade, P.R.; et al. priority species to support the functional integrity of coral reefs. In *Oceanography and Mar. Biol.*; Hawkins, S.J., Allcock, A.L., Bates, A.E., Evans, A.J., Firth, L.B., McQuaid, C.D., Russell, B.D., Smith, I.P., Swearer, S.E., Todd, P.A., Eds.; CRC Press, 2020; pp. 179–326 ISBN 978-0-429-35149-5.
455. Wrona, F.J.; Prowse, T.D.; Reist, J.D.; Hobbie, J.E.; Lévesque, L.M.J.; Macdonald, R.W.; Vincent, W.F. Effects of ultraviolet radiation and contaminant-related stressors on arctic freshwater ecosystems. *AMBIO: A Journal of the Human Environment* 2006, 35, 388–401, doi:10.1579/0044-7447(2006)35[388:EOURAC]2.0.CO;2.
456. Wu, H.; Cockshutt, A.M.; McCarthy, A.; Campbell, D.A. Distinctive Photosystem II Photoinactivation and Protein Dynamics in Marine Diatoms. *Plant Physiol.* 2011, 156, 2184–2195, doi:10.1104/pp.111.178772.
457. Wu, N.; Dong, X.; Liu, Y.; Wang, C.; Baattrup-Pedersen, A.; Riis, T. Using river microalgae as indicators for freshwater biomonitoring: review of published research and future directions. *Ecol. Indic.* 2017, 81, 124–131, doi:10.1016/j.ecolind.2017.05.066.
458. Wu, S.; Sun, J.; Chi, S.; Wang, L.; Wang, X.; Liu, C.; Li, X.; Yin, J.; Liu, T.; Yu, J. transcriptome sequencing of essential marine brown and red algal species in china and its significance in algal biology and phylogeny. *Acta Oceanol. Sin.* 2014, 33, 1–12, doi:10.1007/s13131-014-0435-4.
459. Wu, Y.; Wang, Y.; Li, Y.; Du, J.; Wang, Z.; Deng, S. Effects of single-walled carbon nanotubes on growth and physiological characteristics of *Microcystis aeruginosa*. *J. Cent. South Univ.* 2018, 25, 1628–1641, doi:10.1007/s11771-018-3855-z.
460. Xiao, Y.; Zhang, S.; Li, Z.; Wu, X.; Wang, S.; Guo, J. Turbulent mixing mediates the photosynthetic activities and biochemical composition of anabaena: implications for bioengineering. *J. Appl. Phycol.* 2018, 30, 2227–2236, doi:10.1007/s10811-018-1465-7.
461. Xie, X.J.; Wang, X.L.; Lin, L.D.; He, L.W.; Gu, W.H.; Gao, S.; Yan, X.F.; Pan, G.H.; Wu, M.J.; Wang, G.C. Effects of hypo- and hypersalinity on photosynthetic performance of *Sargassum fusiforme* (Fucales, Heterokontophyta). *Photosynth.* 2016, 54, 210–218, doi:10.1007/s11099-015-0169-3.
462. Xie, Z.; Pei, H.; Zhang, L.; Yang, Z.; Nie, C.; Hou, Q.; Yu, Z. Accelerating lipid production in freshwater alga *Chlorella sorokiniana* SDEC-18 by Seawater and Ultrasound during the Stationary Phase. *Renewable Energy* 2020, 161, 448–456, doi:10.1016/j.renene.2020.07.038.
463. Xin, X.; Huang, G.; An, C.; Huang, C.; Weger, H.; Zhao, S.; Zhou, Y.; Rosendahl, S. Insights into the toxicity of triclosan to green microalga *Chlorococcum* Sp. using synchrotron-based fourier transform infrared spectromicroscopy: biophysiological analyses and roles of environmental factors. *Environ. Sci. Technol.* 2018, 52, 2295–2306, doi:10.1021/acs.est.7b05533.
464. Xin, X.; Huang, G.; Zhang, B. Review of Aquatic Toxicity of Pharmaceuticals and Personal Care Products to Algae. *J. Hazard. Mater.* 2021, 410, 2–18, doi:10.1016/j.jhazmat.2020.124619.

- 
465. Xu, J.; Li, M.; Mak, N.K.; Chen, F.; Jiang, Y. Triphenyltin induced growth inhibition and antioxidative responses in the green microalga *Scenedesmus quadricauda*. *Ecotoxicology* 2011, 20, 73–80, doi:10.1007/s10646-010-0557-1.
466. Xu, S.; Zhang, Z.; Yu, K.; Huang, X.; Chen, H.; Qin, Z.; Liang, R. Spatial variations in the trophic status of *Favia palauensis* Corals in the South China Sea: Insights into Their Different Adaptabilities under Contrasting Environmental Conditions. *Sci. China Earth Sci.* 2021, 64, 839–852, doi:10.1007/s11430-020-9774-0.
467. Yalcin, D. Growth, lipid content, and fatty acid profile of freshwater Cyanobacteria *Dolichospermum affine* (Lemmermann) Wacklin, Hoffmann, & Komárek by Using Modified Nutrient Media. *Aquacult. Int.* 2020, 28, 1371–1388, doi:10.1007/s10499-020-00531-2.
468. Yang, L.; Duan, F.; Tian, H.; He, K.; Ma, Y.; Ma, T.; Li, H.; Yang, S.; Zhu, L. biotoxicity of water-soluble species in PM2.5 using *Chlorella*. *Environ. Pollut.* 2019, 250, 914–921, doi:10.1016/j.envpol.2019.04.017.
469. Yildiz, G.; Dere, Ş. The effects of elevated-co2 on physiological performance of *Bryopsis plumosa*. *Acta Oceanol. Sin.* 2015, 34, 125–129, doi:10.1007/s13131-015-0652-5.
470. Yin, J.; Fan, W.; Du, J.; Feng, W.; Dong, Z.; Liu, Y.; Zhou, T. The toxicity of graphene oxide affected by algal physiological characteristics: a comparative study in cyanobacterial, green algae, diatom. *Environ. Pollut.* 2020, 260, 113847, doi:10.1016/j.envpol.2019.113847.
471. Yong Wai, K.; Tan Yong, H.; Poong Sze, W.; Lim Phaik, E. Response of microalgae in a changing climate and environment. *M.J.S.* 2016, 35, 169–191, doi:10.22452/mjs.vol35no2.7.
472. Young, S.M.M.; Van Der Merwe, N.J. Evaluation of ancient diet: dietary tracing by stable isotope analysis of consumer tissues. *amino acids* 1998, 15, 271–290, doi:10.1007/BF01318866.
473. Yu, E.T.; Zendejas, F.J.; Lane, P.D.; Gaucher, S.; Simmons, B.A.; Lane, T.W. triacylglycerol accumulation and profiling in the model diatoms *Thalassiosira pseudonana* and *Phaeodactylum tricornutum* (Baccilariophyceae) during Starvation. *J. Appl. Phycol.* 2009, 21, 669–681, doi:10.1007/s10811-008-9400-y.
474. Yu, Z.; Yang, H.; Liu, B.; Xing, K.; Zhang, L.; Xu, Q. Survival, growth and immune activity of scallop *Chlamys farreri* cultured at different depths in Haizhou Bay (Yellow Sea, China) during hot season. *Chin. J. Ocean. Limnol.* 2010, 28, 498–507, doi:10.1007/s00343-010-9025-2.
475. Zabala-Agudelo, A.M.; Hernández, E.; Agudelo, D.M.; Aguirre N.J., Vélez F.D. Variación temporal de la morfología funcional del fitoplancton en una planicie inundable del Caribe Colombiano. *Biota colomb.* 2019, 20, 2-19. doi.org/10.21068/c2019.v20n02a01.
476. Zamuda, C.D.; Sunda, W.G. Bioavailability of dissolved copper to the american oyster *crassostrea virginica*. I. Importance of Chemical Speciation. *Mar. Biol.* 1982, 66, 77–82, doi:10.1007/BF00397257.
477. Zanchetta, E.; Damergi, E.; Patel, B.; Borgmeyer, T.; Pick, H.; Pulgarin, A.; Ludwig, C. algal cellulose, production and potential use in plastics: challenges and opportunities. *Algal Research* 2021, 56, 102288, doi:10.1016/j.algal.2021.102288.
478. Zhang, C.; Ho, S.-H.; Li, A.; Fu, L.; Zhou, D. Co-culture of *Chlorella* and *Scenedesmus* could enhance total lipid production under bacteria quorum sensing molecule stress. *J. Water Process. Eng.* 2021, 39, 101739, doi:10.1016/j.jwpe.2020.101739.
479. Zhao, L.; Gao, F.; Gao, S.; Liang, Y.; Long, H.; Lv, Z.; Su, Y.; Ye, N.; Zhang, L.; Zhao, C.; et al. Biodiversity-based development and evolution: the emerging research systems in model and non-model organisms. *Sci. China Life Sci.* 2021, 64, 1236–1280, doi:10.1007/s11427-020-1915-y.
480. Zhou, W.; Tang, X.; Xiao, H.; Wang, Y.; Wang, R. Response of marine microalgae, heterotrophic bacteria and their relationship to enhanced UV-B radiation. *J. Ocean Univ. China* 2009, 8, 35–38, doi:10.1007/s11802-009-0035-7.
481. Zhu, B.; Pan, K.; Wang, G. Effects of host starvation on the symbiotic dinoflagellates from the Sea Anemone *Stichodactyla mertensii*. *Mar. Ecology* 2011, 32, 15–23, doi:10.1111/j.1439-0485.2010.00405.x.
482. Zorina, A.A.; Mironov, K.S.; Stepanchenko, N.S.; Sinetova, M.A.; Koroban, N.V.; Zinchenko, V.V.; Kupriyanova, E.V.; Allakhverdiev, S.I.; Los, D.A. Regulation systems for stress responses in cyanobacteria. *Russ. J. Plant Physiol.* 2011, 58, 749–767, doi:10.1134/S1021443711050281.
483. Zubrzycki, I.Z.; Lee, S.; Lee, K.; Wiacek, M.; Lee, W. The study on highly expressed proteins as a function of an elevated ultra-violet radiation in the copepod, *Tigriopus japonicus*. *Ocean Sci. J.* 2012, 47, 75–82, doi:10.1007/s12601-012-0008-4.

**Table S1.** Global database

| Platforms | Journal                                    | Author                                                                                                                         | Year | Title                                                                                                                                                       | URL                                                                                                                                                                                                                                                                                                                                                 | Doi                           | Type of environment   | Country        | Climate | Mention the process of eutrophication studies |
|-----------|--------------------------------------------|--------------------------------------------------------------------------------------------------------------------------------|------|-------------------------------------------------------------------------------------------------------------------------------------------------------------|-----------------------------------------------------------------------------------------------------------------------------------------------------------------------------------------------------------------------------------------------------------------------------------------------------------------------------------------------------|-------------------------------|-----------------------|----------------|---------|-----------------------------------------------|
| Scopus    | Frontiers in Microbiology                  | Martin R.M., Moniruzzaman M., Stark G.F., Gann E.R., Derminio D.S., Wei B., Hellweger F.L., Pinto A., Boyer G.L., Wilhelm S.W. | 2020 | Episodic Decrease in Temperature Increases mcy Gene Transcription and Cellular Microcystin in Continuous Cultures of <i>Microcystis aeruginosa</i> PCC 7806 | <a href="https://www.scopus.com/inward/record.uri?eid=2-s2.0-85097791928&amp;doi=10.3389%2ffmicb.2020.601864&amp;part-nerID=40&amp;md5=224a4a06a267b734c07fb1c55b351968">https://www.scopus.com/inward/record.uri?eid=2-s2.0-85097791928&amp;doi=10.3389%2ffmicb.2020.601864&amp;part-nerID=40&amp;md5=224a4a06a267b734c07fb1c55b351968</a>         | 10.3389/fmicb.2020.601864     | Freshwater            | Estados Unidos | Cfa     | Yes                                           |
| Scopus    | Ecotoxicology and Environmental Safety     | Almeida A.C., Gomes T., Lomba J.A.B., Lillicrap A.                                                                             | 2021 | Specific toxicity of azithromycin to the freshwater microalga <i>Raphidocelis subcapitata</i>                                                               | <a href="https://www.scopus.com/inward/record.uri?eid=2-s2.0-85111260854&amp;doi=10.1016%2fj.ecoenv.2021.112553&amp;part-nerID=40&amp;md5=6da6798f27f23b7b2bf35862e29e9a0b">https://www.scopus.com/inward/record.uri?eid=2-s2.0-85111260854&amp;doi=10.1016%2fj.ecoenv.2021.112553&amp;part-nerID=40&amp;md5=6da6798f27f23b7b2bf35862e29e9a0b</a>   | 10.1016/j.ecoenv.2021.112553  | Freshwater            | Noruega        | Dfb     | Not                                           |
| Scopus    | Environmental Pollution                    | Alho L.D.O.G., Souza J.P., Rocha G.S., Mansano A.D.S., Lombardi A.T., Sarmento H., Melão M.G.G.                                | 2020 | Photosynthetic, morphological and biochemical biomarkers as tools to investigate copper oxide nanoparticle toxicity to a freshwater chlorophyceae           | <a href="https://www.scopus.com/inward/record.uri?eid=2-s2.0-85086479453&amp;doi=10.1016%2fj.envpol.2020.114856&amp;part-nerID=40&amp;md5=24cef4095d9cbb84d9009fee3a87a946">https://www.scopus.com/inward/record.uri?eid=2-s2.0-85086479453&amp;doi=10.1016%2fj.envpol.2020.114856&amp;part-nerID=40&amp;md5=24cef4095d9cbb84d9009fee3a87a946</a>   | 10.1016/j.envpol.2020.114856  | Freshwater            | Brasil         | Cfa     | Not                                           |
| Scopus    | International Journal of Radiation Biology | Hosseini Tafreshi S.A., Aghaie P., Toghyani M.A., Ramazani-Moghaddam-Arani A.                                                  | 2020 | Improvement of ionizing gamma irradiation tolerance of <i>Chlorella vulgaris</i> by pretreatment with polyethylene glycol                                   | <a href="https://www.scopus.com/inward/record.uri?eid=2-s2.0-85082456095&amp;doi=10.1080%2f09553002.2020.1741717&amp;part-nerID=40&amp;md5=8ccc3d9c6ca714e79b6d78da9a8823ad">https://www.scopus.com/inward/record.uri?eid=2-s2.0-85082456095&amp;doi=10.1080%2f09553002.2020.1741717&amp;part-nerID=40&amp;md5=8ccc3d9c6ca714e79b6d78da9a8823ad</a> | 10.1080/09553002.2020.1741717 | Freshwater            | Irán           | Cfa     | Not                                           |
| Scopus    | Energy, Ecology and Environment            | Sarker N.K., Salam P.A.                                                                                                        | 2020 | Design of batch algal cultivation systems and ranking of the design parameters                                                                              | <a href="https://www.scopus.com/inward/record.uri?eid=2-s2.0-85079744012&amp;doi=10.1007%2fs40974-020-00149-3&amp;part-nerID=40&amp;md5=96002b0b5a3bd012d3115e92ab782573">https://www.scopus.com/inward/record.uri?eid=2-s2.0-85079744012&amp;doi=10.1007%2fs40974-020-00149-3&amp;part-nerID=40&amp;md5=96002b0b5a3bd012d3115e92ab782573</a>       | 10.1007/s40974-020-00149-3    | Freshwater            | Tailandia      | Aw      | Not                                           |
| Scopus    | Ecotoxicology and Environmental Safety     | Husseini Z.N., Hosseini Tafreshi S.A., Aghaie P., Toghyani M.A.                                                                | 2020 | CaCl <sub>2</sub> pretreatment improves gamma toxicity tolerance in microalga <i>Chlorella vulgaris</i>                                                     | <a href="https://www.scopus.com/inward/record.uri?eid=2-s2.0-85078659609&amp;doi=10.1016%2fj.ecoenv.2020.110261&amp;part-nerID=40&amp;md5=5d42a07ecfcca9bdbd4d3c30930014cd">https://www.scopus.com/inward/record.uri?eid=2-s2.0-85078659609&amp;doi=10.1016%2fj.ecoenv.2020.110261&amp;part-nerID=40&amp;md5=5d42a07ecfcca9bdbd4d3c30930014cd</a>   | 10.1016/j.ecoenv.2020.110261  | Freshwater            | Irán           | Cfa     | Not                                           |
| Scopus    | International Aquatic Research             | Kasan N.A., Hashim F.S., Haris N., Zakaria M.F., Mohamed N.N., Rasdi N.W., Wahid M.E.A., Katakayama T., Takahashi K., Jusoh M. | 2020 | Isolation of freshwater and marine indigenous microalgae species from terengganu water bodies for potential uses as live feeds in aquaculture industry      | <a href="https://www.scopus.com/inward/record.uri?eid=2-s2.0-85084348438&amp;doi=10.22034%2fIAR%282">https://www.scopus.com/inward/record.uri?eid=2-s2.0-85084348438&amp;doi=10.22034%2fIAR%282</a>                                                                                                                                                 | 10.22034/IAR(20).2020.671730  | Marine and Freshwater | Malasia        | Af      | Not                                           |

| Platforms | Journal                                                                 | Author                                                                                    | Year | Title                                                                                                                                                                      | URL                                                                                                                                                                                                                                                                                                                                                     | Doi                             | Type of environment | Country        | Climate | Mention the process of eutrophication studies |
|-----------|-------------------------------------------------------------------------|-------------------------------------------------------------------------------------------|------|----------------------------------------------------------------------------------------------------------------------------------------------------------------------------|---------------------------------------------------------------------------------------------------------------------------------------------------------------------------------------------------------------------------------------------------------------------------------------------------------------------------------------------------------|---------------------------------|---------------------|----------------|---------|-----------------------------------------------|
|           |                                                                         |                                                                                           |      |                                                                                                                                                                            | <a href="#">0%29.2020.671730&amp;part-nerID=40&amp;md5=2060f06c21a7d29e7b7ed84e368ffc82</a>                                                                                                                                                                                                                                                             |                                 |                     |                |         |                                               |
| Scopus    | Science of the Total Environment                                        | Almeida A.C., Gomes T., Habuda-Stanić M., Lomba J.A.B., Romić, Turkalj J.V., Lillicrap A. | 2019 | Characterization of multiple biomarker responses using flow cytometry to improve environmental hazard assessment with the green microalgae <i>Raphidocelis subcapitata</i> | <a href="https://www.scopus.com/inward/record.uri?eid=2-s2.0-85067284508&amp;doi=10.1016%2fj.scitotenv.2019.06.124&amp;part-nerID=40&amp;md5=f4dc82f0847a83567cb20dbfa8b0232c">https://www.scopus.com/inward/record.uri?eid=2-s2.0-85067284508&amp;doi=10.1016%2fj.scitotenv.2019.06.124&amp;part-nerID=40&amp;md5=f4dc82f0847a83567cb20dbfa8b0232c</a> | 10.1016/j.scitotenv.2019.06.124 | Freshwater          | Noruega        | Dfb     | Not                                           |
| Scopus    | Aquatic Ecology                                                         | Beecraft L., Watson S.B., Smith R.E.H.                                                    | 2019 | Innate resistance of PSII efficiency to sunlight stress is not an advantage for cyanobacteria compared to eukaryotic phytoplankton                                         | <a href="https://www.scopus.com/inward/record.uri?eid=2-s2.0-85065397988&amp;doi=10.1007%2fs10452-019-09694-4&amp;part-nerID=40&amp;md5=47cc4e5a26cd953613be540af605818d">https://www.scopus.com/inward/record.uri?eid=2-s2.0-85065397988&amp;doi=10.1007%2fs10452-019-09694-4&amp;part-nerID=40&amp;md5=47cc4e5a26cd953613be540af605818d</a>           | 10.1007/s10452-019-09694-4      | Freshwater          | Canadá         | Dfb     | Yes                                           |
| Scopus    | Ecotoxicology and Environmental Safety                                  | Alho L.D.O.G., Gebara R.C., Paina K.D.A., Sarmiento H., Melão M.D.G.G.                    | 2019 | Responses of <i>Raphidocelis subcapitata</i> exposed to Cd and Pb: Mechanisms of toxicity assessed by multiple endpoints                                                   | <a href="https://www.scopus.com/inward/record.uri?eid=2-s2.0-85057813234&amp;doi=10.1016%2fj.ecoenv.2018.11.087&amp;part-nerID=40&amp;md5=04fa37b6d7bbc1527844d405b3cb77f3">https://www.scopus.com/inward/record.uri?eid=2-s2.0-85057813234&amp;doi=10.1016%2fj.ecoenv.2018.11.087&amp;part-nerID=40&amp;md5=04fa37b6d7bbc1527844d405b3cb77f3</a>       | 10.1016/j.ecoenv.2018.11.087    | Freshwater          | Brasil         | Cfa     | Not                                           |
| Scopus    | European Journal of Phycology                                           | Kozik C., Young E.B., Sandgren C.D., Berges J.A.                                          | 2019 | Cell death in individual freshwater phytoplankton species: relationships with population dynamics and environmental factors                                                | <a href="https://www.scopus.com/inward/record.uri?eid=2-s2.0-85063578936&amp;doi=10.1080%2f09670262.2018.1563216&amp;part-nerID=40&amp;md5=dff445df7965525c32c94a17e9a3e99a">https://www.scopus.com/inward/record.uri?eid=2-s2.0-85063578936&amp;doi=10.1080%2f09670262.2018.1563216&amp;part-nerID=40&amp;md5=dff445df7965525c32c94a17e9a3e99a</a>     | 10.1080/09670262.2018.1563216   | Freshwater          | Estados Unidos | Dfa     | Not                                           |
| Scopus    | Nature Communications                                                   | Tamminen M., Betz A., Pereira A.L., Thali M., Matthews B., Suter M.J.-F., Narwani A.      | 2018 | Proteome evolution under non-substitutable resource limitation                                                                                                             | <a href="https://www.scopus.com/inward/record.uri?eid=2-s2.0-85056115041&amp;doi=10.1038%2fs41467-018-07106-z&amp;part-nerID=40&amp;md5=752616ef201cf5e570d1d97a4426d992">https://www.scopus.com/inward/record.uri?eid=2-s2.0-85056115041&amp;doi=10.1038%2fs41467-018-07106-z&amp;part-nerID=40&amp;md5=752616ef201cf5e570d1d97a4426d992</a>           | 10.1038/s41467-018-07106-z      | Freshwater          | Suiza          | Dfb     | Not                                           |
| Scopus    | Antonie van Leeuwenhoek, International Journal of General and Molecular | Bell T.A.S., Sen-Kilic E., Felföldi T., Vasas G., Fields M.W., Peyton B.M.                | 2018 | Microbial community changes during a toxic cyanobacterial bloom in an alkaline Hungarian lake                                                                              | <a href="https://www.scopus.com/inward/record.uri?eid=2-s2.0-85051279294&amp;doi=10.1007%2fs10482-018-1132-7&amp;part-nerID=40&amp;md5=934e9d3b312d2051529db70230b6444e">https://www.scopus.com/inward/record.uri?eid=2-s2.0-85051279294&amp;doi=10.1007%2fs10482-018-1132-7&amp;part-nerID=40&amp;md5=934e9d3b312d2051529db70230b6444e</a>             | 10.1007/s10482-018-1132-7       | Freshwater          | Hungría        | Cfa     | Not                                           |

| Platforms | Journal                                      | Author                                                                                               | Year | Title                                                                                                                                                                                                                     | URL                                                                                                                                                                                                                                                                                                                                                 | Doi                           | Type of environment   | Country             | Climate | Mention the process of eutrophication studies |
|-----------|----------------------------------------------|------------------------------------------------------------------------------------------------------|------|---------------------------------------------------------------------------------------------------------------------------------------------------------------------------------------------------------------------------|-----------------------------------------------------------------------------------------------------------------------------------------------------------------------------------------------------------------------------------------------------------------------------------------------------------------------------------------------------|-------------------------------|-----------------------|---------------------|---------|-----------------------------------------------|
|           | Microbiology                                 |                                                                                                      |      |                                                                                                                                                                                                                           |                                                                                                                                                                                                                                                                                                                                                     |                               |                       |                     |         |                                               |
| Scopus    | Journal of Phycology                         | Hsieh C.-J., Zhan S.H., Liao C.-P., Tang S.-L., Wang L.-C., Watanabe T., Geraldino P.J.L., Liu S.-L. | 2018 | The effects of contemporary selection and dispersal limitation on the community assembly of acidophilic microalgae                                                                                                        | <a href="https://www.scopus.com/inward/record.uri?eid=2-s2.0-85053401820&amp;doi=10.1111%2fjpy.12771&amp;part-nerID=40&amp;md5=faa728af7ab4bc58033da50bb3e9eefc">https://www.scopus.com/inward/record.uri?eid=2-s2.0-85053401820&amp;doi=10.1111%2fjpy.12771&amp;part-nerID=40&amp;md5=faa728af7ab4bc58033da50bb3e9eefc</a>                         | 10.1111/jpy.12771             | Freshwater            | Provincia de Taiwán | Cfa     | Not                                           |
| Scopus    | Environmental Science and Technology         | Xin X., Huang G., An C., Huang C., Weger H., Zhao S., Zhou Y., Rosendahl S.                          | 2018 | Insights into the Toxicity of Triclosan to Green Microalga <i>Chlorococcum</i> sp. Using Synchrotron-Based Fourier Transform Infrared Spectromicroscopy: Biophysiological Analyses and Roles of Environmental Factors     | <a href="https://www.scopus.com/inward/record.uri?eid=2-s2.0-85042302618&amp;doi=10.1021%2facs.est.7b05533&amp;part-nerID=40&amp;md5=8105c9b9f8f28e72bbf457ed64fd42b3">https://www.scopus.com/inward/record.uri?eid=2-s2.0-85042302618&amp;doi=10.1021%2facs.est.7b05533&amp;part-nerID=40&amp;md5=8105c9b9f8f28e72bbf457ed64fd42b3</a>             | 10.1021/acs.est.7b05533       | Marine and Freshwater | Canadá              | Dfb     | Not                                           |
| Scopus    | Journal of Plankton Research                 | Bemal S., Anil A.C.                                                                                  | 2018 | Effects of salinity on cellular growth and exopolysaccharide production of freshwater <i>Synechococcus</i> strain CCAP1405                                                                                                | <a href="https://www.scopus.com/inward/record.uri?eid=2-s2.0-85041180325&amp;doi=10.1093%2fplankt%2f-fbx064&amp;part-nerID=40&amp;md5=748ea61a402c52081ef4880fb26abc09">https://www.scopus.com/inward/record.uri?eid=2-s2.0-85041180325&amp;doi=10.1093%2fplankt%2f-fbx064&amp;part-nerID=40&amp;md5=748ea61a402c52081ef4880fb26abc09</a>           | 10.1093/plankt/fbx064         | Marine and Freshwater | India               | Am      | Not                                           |
| Scopus    | Journal of Great Lakes Research              | Somogyi B., Felföldi T., V.-Balogh K., Boros E., Pálffy K., Vörös L.                                 | 2016 | The role and composition of winter picoeukaryotic assemblages in shallow Central European great lakes                                                                                                                     | <a href="https://www.scopus.com/inward/record.uri?eid=2-s2.0-85006789440&amp;doi=10.1016%2fj.jglr.2016.10.003&amp;part-nerID=40&amp;md5=cb6f63027dc3dd02c59962eb6c7e3551">https://www.scopus.com/inward/record.uri?eid=2-s2.0-85006789440&amp;doi=10.1016%2fj.jglr.2016.10.003&amp;part-nerID=40&amp;md5=cb6f63027dc3dd02c59962eb6c7e3551</a>       | 10.1016/j.jglr.2016.10.003    | Freshwater            | Hungria             | Cfb     | Not                                           |
| Scopus    | European Journal of Phycology                | Cozza D., Torelli A., Veltri A., Ferrari M., Marieschi M., Cozza R.                                  | 2016 | Ultrastructural features, chromium content and in situ immunodetection of 5-methylcytosine following Cr (VI) treatment in two strains of <i>Scenedesmus acutus</i> M. (Chlorophyceae) with different chromium sensitivity | <a href="https://www.scopus.com/inward/record.uri?eid=2-s2.0-84967138151&amp;doi=10.1080%2f09670262.2016.1157902&amp;part-nerID=40&amp;md5=40e470d1315e59daf960c5bb3983a7cb">https://www.scopus.com/inward/record.uri?eid=2-s2.0-84967138151&amp;doi=10.1080%2f09670262.2016.1157902&amp;part-nerID=40&amp;md5=40e470d1315e59daf960c5bb3983a7cb</a> | 10.1080/09670262.2016.1157902 | Freshwater            | Italia              | Cfa     | Not                                           |
| Scopus    | Environmental Science and Pollution Research | Piotrowska-Niczyporuk A., Bajguz A., Talarek M., Bralska M., Zambrycka E.                            | 2015 | The effect of lead on the growth, content of primary metabolites, and antioxidant response of green alga <i>Acutodesmus obliquus</i> (Chlorophyceae)                                                                      | <a href="https://www.scopus.com/inward/record.uri?eid=2-s2.0-84949104146&amp;doi=10.1007%2fs11356-015-5118-y&amp;part-nerID=40&amp;md5=5db8f4015be2feab14df1fa102feb0b1">https://www.scopus.com/inward/record.uri?eid=2-s2.0-84949104146&amp;doi=10.1007%2fs11356-015-5118-y&amp;part-nerID=40&amp;md5=5db8f4015be2feab14df1fa102feb0b1</a>         | 10.1007/s11356-015-5118-y     | Freshwater            | Polonia             | Dfb     | Not                                           |



| Platforms     | Journal                                | Author                                                                              | Year | Title                                                                                                                                                                       | URL                                                                                                                                                                                                                                                                                                                                                       | Doi                                                                                                 | Type of environment   | Country                 | Climate | Mention the process of eutrophication studies |
|---------------|----------------------------------------|-------------------------------------------------------------------------------------|------|-----------------------------------------------------------------------------------------------------------------------------------------------------------------------------|-----------------------------------------------------------------------------------------------------------------------------------------------------------------------------------------------------------------------------------------------------------------------------------------------------------------------------------------------------------|-----------------------------------------------------------------------------------------------------|-----------------------|-------------------------|---------|-----------------------------------------------|
| Scopus        | Journal of Limnology                   | Han W., Jing Y., Li T.                                                              | 2015 | Compensatory growth in <i>Microcystis aeruginosa</i> after moderate high-temperature exposure                                                                               | <a href="https://www.scopus.com/inward/record.uri?eid=2-s2.0-84945548777&amp;doi=10.4081%2fjlimnol.2015.1164&amp;part-nerID=40&amp;md5=0d9de90ccc051466a61a92f99cbd2e09">https://www.scopus.com/inward/record.uri?eid=2-s2.0-84945548777&amp;doi=10.4081%2fjlimnol.2015.1164&amp;part-nerID=40&amp;md5=0d9de90ccc051466a61a92f99cbd2e09</a>               | 10.4081/jlimnol.2015.1164                                                                           | Marine and Freshwater | República Popular China | Cfa     | Yes                                           |
| Scopus        | Ecotoxicology and Environmental Safety | Ha M.-H., Contardo-Jara V., Pflugmacher S.                                          | 2014 | Uptake of the cyanobacterial neurotoxin, anatoxin-a, and alterations in oxidative stress in the submerged aquatic plant Ceratophyllum demersum                              | <a href="https://www.scopus.com/inward/record.uri?eid=2-s2.0-84893181719&amp;doi=10.1016%2fj.ecoenv.2013.12.023&amp;part-nerID=40&amp;md5=a71f059b81b56fdd59d95cf09d45fa28">https://www.scopus.com/inward/record.uri?eid=2-s2.0-84893181719&amp;doi=10.1016%2fj.ecoenv.2013.12.023&amp;part-nerID=40&amp;md5=a71f059b81b56fdd59d95cf09d45fa28</a>         | 10.1016/j.ecoenv.2013.12.023                                                                        | Freshwater            | Alemania                | Cfb     | Not                                           |
| Scopus        | Algal Research                         | Moll K.M., Gardner R.D., Eustance E.O., Gerlach R., Peyton B.M.                     | 2014 | Combining multiple nutrient stresses and bicarbonate addition to promote lipid accumulation in the diatom RGd-1                                                             | <a href="https://www.scopus.com/inward/record.uri?eid=2-s2.0-84900373140&amp;doi=10.1016%2fj.algal.2014.04.002&amp;part-nerID=40&amp;md5=242cfc7f1042f56116095118b261443b">https://www.scopus.com/inward/record.uri?eid=2-s2.0-84900373140&amp;doi=10.1016%2fj.algal.2014.04.002&amp;part-nerID=40&amp;md5=242cfc7f1042f56116095118b261443b</a>           | 10.1016/j.algal.2014.04.002                                                                         | Marine and Freshwater | Estados Unidos          | Bsk     | Not                                           |
| Scopus        | Chemosphere                            | Ni L., Acharya K., Hao X., Li S.                                                    | 2012 | Isolation and identification of an anti-algal compound from Artemisia annua and mechanisms of inhibitory effect on algae                                                    | <a href="https://www.scopus.com/inward/record.uri?eid=2-s2.0-84862176273&amp;doi=10.1016%2fj.chemosphere.2012.05.009&amp;part-nerID=40&amp;md5=1423f78c56a93a68ffda10aa8bcf5a3">https://www.scopus.com/inward/record.uri?eid=2-s2.0-84862176273&amp;doi=10.1016%2fj.chemosphere.2012.05.009&amp;part-nerID=40&amp;md5=1423f78c56a93a68ffda10aa8bcf5a3</a> | 10.1016/j.chemosphere.2012.05.009                                                                   | Freshwater            | República Popular China | Cfa     | Yes                                           |
| Scopus        | Journal of Phycology                   | Obertegger U., Camin F., Guella G., Flaim G.                                        | 2011 | Adaptation of a psychrophilic freshwater dinoflagellate to ultraviolet radiation                                                                                            | <a href="https://www.scopus.com/inward/record.uri?eid=2-s2.0-79960714353&amp;doi=10.1111%2fj.1529-8817.2011.01025.x&amp;part-nerID=40&amp;md5=8046fc77fa0c471a4309424a4a5ef04c">https://www.scopus.com/inward/record.uri?eid=2-s2.0-79960714353&amp;doi=10.1111%2fj.1529-8817.2011.01025.x&amp;part-nerID=40&amp;md5=8046fc77fa0c471a4309424a4a5ef04c</a> | 10.1111 / j.1529-8817.2011.01025.x                                                                  | Freshwater            | Italia                  | Dfb     | Yes                                           |
| Scopus        | Environmental Microbiology             | Vardi A., Eisenstadt D., Murik O., Berman-Frank I., Zohary T., Levine A., Kaplan A. | 2007 | Synchronization of cell death in a dinoflagellate population is mediated by an excreted thiol protease                                                                      | <a href="https://www.scopus.com/inward/record.uri?eid=2-s2.0-33846040290&amp;doi=10.1111%2fj.1462-2920.2006.01146.x&amp;part-nerID=40&amp;md5=cc9d57de72e7bd76194a012be90a73ea">https://www.scopus.com/inward/record.uri?eid=2-s2.0-33846040290&amp;doi=10.1111%2fj.1462-2920.2006.01146.x&amp;part-nerID=40&amp;md5=cc9d57de72e7bd76194a012be90a73ea</a> | 10.1111/j.1462-2920.2006.01146.x                                                                    | Freshwater            | Israel                  | Bsh     | Not                                           |
| springer-link | Aquaculture International              | Dilek Yalcin                                                                        | 2020 | Growth, lipid content, and fatty acid profile of freshwater cyanobacteria Dolichospermum affine (Lemmermann) Wacklin, Hoffmann, & Komárček by using modified nutrient media | <a href="http://link.springer.com/article/10.1007/s10499-020-00531-2">http://link.springer.com/article/10.1007/s10499-020-00531-2</a>                                                                                                                                                                                                                     | <a href="https://doi.org/10.1007/s10499-020-00531-2">https://doi.org/10.1007/s10499-020-00531-2</a> | Freshwater            | Turquía                 | Csa     | Not                                           |



| Platforms     | Journal                                      | Author                                                                                                                 | Year | Title                                                                                                                                                                               | URL                                                                                                                                   | Doi                                                                                                 | Type of environment   | Country                 | Climate | Mention the process of eutrophication studies |
|---------------|----------------------------------------------|------------------------------------------------------------------------------------------------------------------------|------|-------------------------------------------------------------------------------------------------------------------------------------------------------------------------------------|---------------------------------------------------------------------------------------------------------------------------------------|-----------------------------------------------------------------------------------------------------|-----------------------|-------------------------|---------|-----------------------------------------------|
| springer-link | BMC Genomics                                 | Changqing LiuXiaoli ShiFan WuMingdong RenGuang GaoQin-glong Wu                                                         | 2020 | Genome analyses provide insights into the evolution and adaptation of the eukaryotic Picophytoplankton Mychonastes homosphaera                                                      | <a href="http://link.springer.com/article/10.1186/s12864-020-06891-6">http://link.springer.com/article/10.1186/s12864-020-06891-6</a> | <a href="https://doi.org/10.1186/s12864-020-06891-6">https://doi.org/10.1186/s12864-020-06891-6</a> | Freshwater            | República Popular China | Cfa     | Yes                                           |
| springer-link | Journal of Applied Phycology                 | Giseli Swerts RochaChristopher Charles ParrishAna Teresa LombardiMaria da Graça Gama Melão                             | 2018 | Biochemical and physiological responses of Selenastrum gracile (Chlorophyceae) acclimated to different phosphorus concentrations                                                    | <a href="http://link.springer.com/article/10.1007/s10811-018-1418-1">http://link.springer.com/article/10.1007/s10811-018-1418-1</a>   | <a href="https://doi.org/10.1007/s10811-018-1418-1">https://doi.org/10.1007/s10811-018-1418-1</a>   | Freshwater            | Brasil                  | Cfa     | Not                                           |
| springer-link | Biogeochemistry                              | Patricia M. GlibertCynthia A. HeilChristopher J. MaddenStephen P. Kelly                                                | 2021 | Dissolved organic nutrients at the interface of fresh and marine waters: flow regime changes, biogeochemical cascades and picocyanobacterial blooms—the example of Florida Bay, USA | <a href="http://link.springer.com/article/10.1007/s10533-021-00760-4">http://link.springer.com/article/10.1007/s10533-021-00760-4</a> | <a href="https://doi.org/10.1007/s10533-021-00760-4">https://doi.org/10.1007/s10533-021-00760-4</a> | Marine and Freshwater | Estados Unidos          | Dfa     | Not                                           |
| springer-link | Aquatic Ecology                              | Fumie KasaiMichael T. Arts                                                                                             | 1997 | The interactive effects of UV-B radiation and a herbicide on uptake and allocation of carbon in two strains of the green alga Scenedesmus                                           | <a href="http://link.springer.com/article/10.1007/BF02493513">http://link.springer.com/article/10.1007/BF02493513</a>                 | <a href="https://doi.org/10.1007/BF02493513">https://doi.org/10.1007/BF02493513</a>                 | Freshwater            | Canadá                  | Dfb     | Not                                           |
| springer-link | Microbial Ecology                            | Peter SylvanderNorbert HäubnerPauline Snoeijs                                                                          | 2013 | The Thiamine Content of Phytoplankton Cells Is Affected by Abiotic Stress and Growth Rate                                                                                           | <a href="http://link.springer.com/article/10.1007/s00248-012-0156-1">http://link.springer.com/article/10.1007/s00248-012-0156-1</a>   | <a href="https://doi.org/10.1007/s00248-012-0156-1">https://doi.org/10.1007/s00248-012-0156-1</a>   | Marine and Freshwater | Estados Unidos          | Dfb     | Yes                                           |
| springer-link | Hydrobiology                                 | Simone J. CardosoJoão Carlos NaboutVinicius F. FarjallaPaloma M. LopesReinaldo L. BozelliVera L. M. HuszarFábio Roland | 2017 | Environmental factors driving phytoplankton taxonomic and functional diversity in Amazonian floodplain lakes                                                                        | <a href="http://link.springer.com/article/10.1007/s10750-017-3244-x">http://link.springer.com/article/10.1007/s10750-017-3244-x</a>   | <a href="https://doi.org/10.1007/s10750-017-3244-x">https://doi.org/10.1007/s10750-017-3244-x</a>   | Freshwater            | Brasil                  | Af      | Not                                           |
| springer-link | Hydrobiology                                 | Mathias Ahii ChiaMaria do Carm Bittencourt-Oliveira                                                                    | 2021 | Allelopathic interactions between phytoplankton species alter toxin production, oxidative response, and nitrogen fixation                                                           | <a href="http://link.springer.com/article/10.1007/s10750-021-04665-z">http://link.springer.com/article/10.1007/s10750-021-04665-z</a> | <a href="https://doi.org/10.1007/s10750-021-04665-z">https://doi.org/10.1007/s10750-021-04665-z</a> | Freshwater            | Estados Unidos          | Dfb     | Not                                           |
| springer-link | Journal of Applied Phycology                 | Yan XiaoShuqing ZhangZhe Li-Xinghua WuShu WangJinsong Guo                                                              | 2018 | Turbulent mixing mediates the photosynthetic activities and biochemical composition of Anabaena: implications for bioengineering                                                    | <a href="http://link.springer.com/article/10.1007/s10811-018-1465-7">http://link.springer.com/article/10.1007/s10811-018-1465-7</a>   | <a href="https://doi.org/10.1007/s10811-018-1465-7">https://doi.org/10.1007/s10811-018-1465-7</a>   | Freshwater            | República Popular China | Cfa     | Not                                           |
| springer-link | Journal of Applied Phycology                 | Yan HeQiao-Hong ZhouBi-Yun LiuLong ChengYun TianYong-Yuan ZhangZhen-Bin Wu                                             | 2016 | Programmed cell death in the cyanobacterium Microcystis aeruginosa induced by allelopathic effect of submerged macrophyte Myriophyllum spicatum in co-culture system                | <a href="http://link.springer.com/article/10.1007/s10811-016-0814-7">http://link.springer.com/article/10.1007/s10811-016-0814-7</a>   | <a href="https://doi.org/10.1007/s10811-016-0814-7">https://doi.org/10.1007/s10811-016-0814-7</a>   | Freshwater            | República Popular China | Cfa     | Yes                                           |
| springer-link | Environmental Science and Pollution Research | Ye LiangYuqi SuKai OuyangXinglan ChenJiaxin Yang                                                                       | 2017 | Effects of microcystin-producing and microcystin-free Microcystis aeruginosa on enzyme activity and nutrient content in the rotifer Brachionus calyciflorus                         | <a href="http://link.springer.com/article/10.1007/s11356-017-8704-3">http://link.springer.com/article/10.1007/s11356-017-8704-3</a>   | <a href="https://doi.org/10.1007/s11356-017-8704-3">https://doi.org/10.1007/s11356-017-8704-3</a>   | Freshwater            | República Popular China | Cfa     | Yes                                           |

| Platforms     | Journal                                                                               | Author                                                                                               | Year | Title                                                                                                                                                      | URL                                                                                                                                   | Doi                                                                                                 | Type of environment | Country                 | Climate | Mention the process of eutrophication studies |
|---------------|---------------------------------------------------------------------------------------|------------------------------------------------------------------------------------------------------|------|------------------------------------------------------------------------------------------------------------------------------------------------------------|---------------------------------------------------------------------------------------------------------------------------------------|-----------------------------------------------------------------------------------------------------|---------------------|-------------------------|---------|-----------------------------------------------|
| springer-link | Chinese Journal of Oceanology and Limnology                                           | Caixia Kang 康晓霞Takahiro KubaAimin Hao 郝敏Yasushi IseriChunjie Li 李春杰Zhenjia Zhang 张震家                 | 2015 | Oxidative stress responses of submerged macrophyte <i>Vallisneria asiatica</i> to different concentrations of cyanobacteria                                | <a href="http://link.springer.com/article/10.1007/s00343-015-4084-z">http://link.springer.com/article/10.1007/s00343-015-4084-z</a>   | <a href="https://doi.org/10.1186/2008-6970-5-7">https://doi.org/10.1186/2008-6970-5-7</a>           | Freshwater          | Japón                   | Cfa     | Not                                           |
| springer-link | Journal of Applied Phycology                                                          | Wenjing WangHong ShenPengling ShiJun ChenLeyi NiPing Xie                                             | 2016 | Experimental evidence for the role of heterotrophic bacteria in the formation of Microcystis colonies                                                      | <a href="http://link.springer.com/article/10.1007/s10811-015-0659-5">http://link.springer.com/article/10.1007/s10811-015-0659-5</a>   | <a href="https://doi.org/10.1007/s10811-015-0659-5">https://doi.org/10.1007/s10811-015-0659-5</a>   | Freshwater          | República Popular China | Cfa     | Yes                                           |
| springer-link | Journal of Applied Phycology                                                          | Mathias Ahii ChiaPromise Kalu ChimdirimWisdom Sohunago Japhet                                        | 2015 | Lead induced antioxidant response and phenotypic plasticity of <i>Scenedesmus quadricauda</i> (Turp.) de Brébisson under different nitrogen concentrations | <a href="http://link.springer.com/article/10.1007/s10811-014-0312-8">http://link.springer.com/article/10.1007/s10811-014-0312-8</a>   | <a href="https://doi.org/10.1007/s10811-014-0312-8">https://doi.org/10.1007/s10811-014-0312-8</a>   | Freshwater          | Brasil                  | Aw      | Yes                                           |
| springer-link | Proceedings of the National Academy of Sciences, India Section B: Biological Sciences | M. P. V. V. B. SinghSheo Mohan PrasadVijay Pratap SinghMeenakshi Singh                               | 2015 | Antioxidant System Against Active Oxygen Species in Cyanobacterium <i>Aphanothece stagnina</i> : Response to Excess Light Under Cadmium Stress             | <a href="http://link.springer.com/article/10.1007/s40011-014-0367-y">http://link.springer.com/article/10.1007/s40011-014-0367-y</a>   | <a href="https://doi.org/10.1007/s40011-014-0367-y">https://doi.org/10.1007/s40011-014-0367-y</a>   | Freshwater          | India                   | Csa     | Not                                           |
| springer-link | Photosynthesis Research                                                               | Greg CookAmber TeufelIsha KalraWei LiXin WangJohn Priscu-Rachael Morgan-Kiss                         | 2019 | The Antarctic psychrophiles <i>Chlamydomonas</i> spp. UWO241 and ICE-MDV exhibit differential restructuring of photosystem I in response to iron           | <a href="http://link.springer.com/article/10.1007/s11120-019-00621-0">http://link.springer.com/article/10.1007/s11120-019-00621-0</a> | doi:10.1007/s11120-019-00621-0.                                                                     | Freshwater          | Estados Unidos          | Cfa     | Not                                           |
| springer-link | Ecotoxicology                                                                         | Raquel PradoCarmen RiobooConcepción HerreroPaula Suárez-BreguaÁngeles Cid                            | 2012 | Flow cytometric analysis to evaluate physiological alterations in herbicide-exposed <i>Chlamydomonas moewusii</i> cells                                    | <a href="http://link.springer.com/article/10.1007/s10646-011-0801-3">http://link.springer.com/article/10.1007/s10646-011-0801-3</a>   | <a href="https://doi.org/10.1007/s10646-011-0801-3">https://doi.org/10.1007/s10646-011-0801-3</a>   | Freshwater          | España                  | Cfb     | Not                                           |
| springer-link | Journal of Soils and Sediments                                                        | Chao ChenXinghua PangYiyao WangMing KongLulu LongMin XuYinlong XiaoJinsong HeGang YangShihuai Deng   | 2021 | Antioxidant responses and microcystins accumulation in <i>Corbicula fluminea</i> following the control of algal blooms using chitosan-modified clays       | <a href="http://link.springer.com/article/10.1007/s11368-021-03022-w">http://link.springer.com/article/10.1007/s11368-021-03022-w</a> | <a href="https://doi.org/10.1007/s11368-021-03022-w">https://doi.org/10.1007/s11368-021-03022-w</a> | Freshwater          | República Popular China | Cfa     | Not                                           |
| springer-link | Journal of Soils and Sediments                                                        | Mahbobe GhanbarzadehVahid NiknamNeda SoltaniHasan EbrahimzadehMohammad Hassan Shahavi                | 2021 | Removal of Phenanthrene by some microalga species and study of antioxidative compounds in Nostoc calcicola ISC 89                                          | <a href="http://link.springer.com/article/10.1007/s11368-021-03065-z">http://link.springer.com/article/10.1007/s11368-021-03065-z</a> | <a href="https://doi.org/10.1007/s11368-021-03065-z">https://doi.org/10.1007/s11368-021-03065-z</a> | Freshwater          | República Popular China | Bsk     | Not                                           |
| springer-link | Journal of Central South University                                                   | Yang Wu 吴阳Ying-jun Wang 王 YingYuan-wei Li 李元伟Zhen-ge Du 杜震Ge Zhang-hong Wang 王 洪Ge Shi-huai Deng 董 磊 | 2018 | Effects of single-walled carbon nanotubes on growth and physiological characteristics of <i>Microcystis aeruginosa</i>                                     | <a href="http://link.springer.com/article/10.1007/s11771-018-3855-z">http://link.springer.com/article/10.1007/s11771-018-3855-z</a>   | <a href="https://doi.org/10.1007/s11771-018-3855-z">https://doi.org/10.1007/s11771-018-3855-z</a>   | Freshwater          | República Popular China | Cfa     | Yes                                           |

| Platforms      | Journal                                                | Author                                                                                                                     | Year | Title                                                                                                                                                                 | URL                                                                                                                                                   | Doi                                                                                                               | Type of environment   | Country                 | Climate | Mention the process of eutrophication studies |
|----------------|--------------------------------------------------------|----------------------------------------------------------------------------------------------------------------------------|------|-----------------------------------------------------------------------------------------------------------------------------------------------------------------------|-------------------------------------------------------------------------------------------------------------------------------------------------------|-------------------------------------------------------------------------------------------------------------------|-----------------------|-------------------------|---------|-----------------------------------------------|
| springer-link  | Ecotoxicology                                          | Jun XuMei LiNai Ki MakFeng<br>ChenYue Jiang                                                                                | 2011 | Triphenyltin induced growth inhibition and antioxidative responses in the green micro-alga <i>Scenedesmus quadricauda</i>                                             | <a href="http://link.springer.com/article/10.1007/s10646-010-0557-1">http://link.springer.com/article/10.1007/s10646-010-0557-1</a>                   | <a href="https://doi.org/10.1007/s10646-010-0557-1">https://doi.org/10.1007/s10646-010-0557-1</a>                 | Freshwater            | República Popular China | Cfa     | Not                                           |
| springer-link  | Archives of Environmental Contamination and Toxicology | L. GeoffroyD. DewezG. VernetR. Popovic                                                                                     | 2003 | Oxyfluorfen Toxic Effect on <i>S. obliquus</i> Evaluated by Different Photosynthetic and Enzymatic Biomarkers                                                         | <a href="http://link.springer.com/article/10.1007/s00244-003-2217-4">http://link.springer.com/article/10.1007/s00244-003-2217-4</a>                   | <a href="https://doi.org/10.1007/s00244-003-2217-4">https://doi.org/10.1007/s00244-003-2217-4</a>                 | Freshwater            | Francia                 | Cfb     | Not                                           |
| springer-link  | Journal of Oceanology and Limnology                    | Dongdong MaYongfu LiHaifang Fu                                                                                             | 2020 | Effect of high temperature on the balance between photosynthetic light absorption and energy utilization in <i>Chlorella pyrenoidosa</i> (Chlorophyceae)              | <a href="http://link.springer.com/article/10.1007/s00343-019-8369-5">http://link.springer.com/article/10.1007/s00343-019-8369-5</a>                   | <a href="https://doi.org/10.1007/s00343-019-8369-5">https://doi.org/10.1007/s00343-019-8369-5</a>                 | Freshwater            | República Popular China | Dfa     | Not                                           |
| springer-link  | Future Journal of Pharmaceutical Sciences              | Biswajita PradhanSrimanta PatraSoumya Ranjan DashRabindra NayakChhandashree BeheraMrutyunjay Jena                          | 2021 | Evaluation of the anti-bacterial activity of methanolic extract of <i>Chlorella vulgaris</i> Beyrerinck [Beijerinck] with special reference to antioxidant modulation | <a href="http://link.springer.com/article/10.1186/s43094-020-00172-5">http://link.springer.com/article/10.1186/s43094-020-00172-5</a>                 | <a href="https://doi.org/10.1186/s43094-020-00172-5">https://doi.org/10.1186/s43094-020-00172-5</a>               | Freshwater            | India                   | Aw      | Not                                           |
| springer-link  | Environmental Science and Pollution Research           | Linfeng ChenYi WangLulu Shi-Jingchan ZhaoWenhui Wang                                                                       | 2019 | Identification of allelochemicals from pomegranate peel and their effects on <i>Microcystis aeruginosa</i> growth                                                     | <a href="http://link.springer.com/article/10.1007/s11356-019-05507-1">http://link.springer.com/article/10.1007/s11356-019-05507-1</a>                 | <a href="https://doi.org/10.1007/s11356-019-05507-1">https://doi.org/10.1007/s11356-019-05507-1</a>               | Freshwater            | República Popular China | Cfa     | Yes                                           |
| springer-link  | Bulletin of Environmental Contamination and Toxicology | Qingqing LiuGuangsheng Zhang-Jiannan DingHua ZouHongxing ShiChaoqun Huang                                                  | 2018 | Evaluation of the Removal of Potassium Cyanide and its Toxicity in Green Algae ( <i>Chlorella vulgaris</i> )                                                          | <a href="http://link.springer.com/article/10.1007/s00128-017-2208-1">http://link.springer.com/article/10.1007/s00128-017-2208-1</a>                   | <a href="https://doi.org/10.1007/s00128-017-2208-1">https://doi.org/10.1007/s00128-017-2208-1</a>                 | Freshwater            | República Popular China | Cfa     | Not                                           |
| Science-Direct | Environmental Pollution,                               | Jingyu Yin, Wenhong Fan, Juan Du, Weiying Feng, Zhaomin Dong, Yingying Liu, Tingting Zhou,                                 | 2020 | The toxicity of graphene oxide affected by algal physiological characteristics: A comparative study in cyanobacterial, green algae, diatom,                           | <a href="https://www.sciencedirect.com/science/article/pii/S0269749119357343">https://www.sciencedirect.com/science/article/pii/S0269749119357343</a> | <a href="https://doi.org/10.1016/j.envpol.2019.113847">https://doi.org/10.1016/j.envpol.2019.113847</a>           | Freshwater            | República Popular China | Cfa     | Not                                           |
| Science-Direct | Ecological Engineering,                                | Min-Kyu Ji, Akhil N. Kabra, Jaewon Choi, Jae-Hoon Hwang, Jung Rae Kim, Reda A.I. Abou-Shanab, You-Kwan Oh, Byong-Hun Jeon, | 2014 | Biodegradation of bisphenol A by the freshwater microalgae <i>Chlamydomonas mexicana</i> and <i>Chlorella vulgaris</i> ,                                              | <a href="https://www.sciencedirect.com/science/article/pii/S0925857414004819">https://www.sciencedirect.com/science/article/pii/S0925857414004819</a> | <a href="https://doi.org/10.1016/j.ecoleng.2014.09.070">https://doi.org/10.1016/j.ecoleng.2014.09.070</a>         | Freshwater            | Corea del Sur           | Dfa     | Yes                                           |
| Science-Direct | Chemosphere,                                           | Andrea Broccoli, Serena Anselmi, Andrea Cavallo, Vittoria Ferrari, Daniela Prevedelli, Paolo Pastorino, Monia Renzi,       | 2021 | Ecotoxicological effects of new generation pollutants (nanoparticles, amoxicillin and white musk) on freshwater and marine phytoplankton species,                     | <a href="https://www.sciencedirect.com/science/article/pii/S0045653521010948">https://www.sciencedirect.com/science/article/pii/S0045653521010948</a> | <a href="https://doi.org/10.1016/j.chemosphere.2021.130623">https://doi.org/10.1016/j.chemosphere.2021.130623</a> | Marine and Freshwater | Italia                  | Csa     | Not                                           |

| Platforms      | Journal                                 | Author                                                                                                                                                                                      | Year | Title                                                                                                                                                                                                                    | URL                                                                                                                                                   | Doi                                                                                                           | Type of environment   | Country                 | Climate | Mention the process of eutrophication studies |
|----------------|-----------------------------------------|---------------------------------------------------------------------------------------------------------------------------------------------------------------------------------------------|------|--------------------------------------------------------------------------------------------------------------------------------------------------------------------------------------------------------------------------|-------------------------------------------------------------------------------------------------------------------------------------------------------|---------------------------------------------------------------------------------------------------------------|-----------------------|-------------------------|---------|-----------------------------------------------|
| Science-Direct | Aquatic Toxicology,                     | Shurui Gu, Hao Zheng, Qingqing Xu, Cuizhu Sun, Mei Shi, Zhenyu Wang, Fengmin Li,                                                                                                            | 2017 | Comparative toxicity of the plasticizer dibutyl phthalate to two freshwater algae,                                                                                                                                       | <a href="https://www.sciencedirect.com/science/article/pii/S0166445X17302291">https://www.sciencedirect.com/science/article/pii/S0166445X17302291</a> | <a href="https://doi.org/10.1016/j.aquatox.2017.08.007">https://doi.org/10.1016/j.aquatox.2017.08.007</a>     | Freshwater            | República Popular China | Cfa     | Not                                           |
| Science-Direct | Ecotoxicology and Environmental Safety, | Laura Míguez, Marta Esperanza, Marta Seoane, Ángeles Cid,                                                                                                                                   | 2021 | Assessment of cytotoxicity biomarkers on the microalga <i>Chlamydomonas reinhardtii</i> exposed to emerging and priority pollutants,                                                                                     | <a href="https://www.sciencedirect.com/science/article/pii/S0147651320314834">https://www.sciencedirect.com/science/article/pii/S0147651320314834</a> | <a href="https://doi.org/10.1016/j.ecoenv.2020.111646">https://doi.org/10.1016/j.ecoenv.2020.111646</a>       | Freshwater            | España                  | Cfb     | Not                                           |
| Science-Direct | Marine Pollution Bulletin,              | Layla J. Hazeem, Gamze Yesilay, Mohamed Bououdina, Simone Perna, Demet Cetin, Zekiye Suludere, Alexandre Barras, Rabah Boukherroub,                                                         | 2020 | Investigation of the toxic effects of different polystyrene micro-and nanoplastics on microalgae <i>Chlorella vulgaris</i> by analysis of cell viability, pigment content, oxidative stress and ultrastructural changes, | <a href="https://www.sciencedirect.com/science/article/pii/S0025326X20303969">https://www.sciencedirect.com/science/article/pii/S0025326X20303969</a> | <a href="https://doi.org/10.1016/j.marpolbul.2020.111278">https://doi.org/10.1016/j.marpolbul.2020.111278</a> | Marine and Freshwater | Baréin                  | Bwh     | Not                                           |
| Science-Direct | Phytochemistry,                         | Joseph Msanne, Di Xu, Anji Reddy Konda, J. Armando Casas-Mollano, Tala Awada, Edgar B. Cahoon, Heriberto Cerutti,                                                                           | 2012 | Metabolic and gene expression changes triggered by nitrogen deprivation in the photoautotrophically grown microalgae <i>Chlamydomonas reinhardtii</i> and <i>Coccomyxa</i> sp. C-169,                                    | <a href="https://www.sciencedirect.com/science/article/pii/S0031942211005619">https://www.sciencedirect.com/science/article/pii/S0031942211005619</a> | <a href="https://doi.org/10.1016/j.phytochem.2011.12.007">https://doi.org/10.1016/j.phytochem.2011.12.007</a> | Freshwater            | Estados Unidos          | Dfa     | Not                                           |
| Science-Direct | Environmental Pollution,                | Hao Li, Jun Yao, Robert Duran, Jianli Liu, Ning Min, Zhihui Chen, Xiaozhe Zhu, Chenchen Zhao, Bo Ma, Wancheng Pang, Miaomiao Li, Ying Cao, Bang Liu,                                        | 2021 | Toxic response of the freshwater green algae <i>Chlorella pyrenoidosa</i> to combined effect of flotation reagent butyl xanthate and nickel,                                                                             | <a href="https://www.sciencedirect.com/science/article/pii/S0269749121008678">https://www.sciencedirect.com/science/article/pii/S0269749121008678</a> | <a href="https://doi.org/10.1016/j.envpol.2021.117285">https://doi.org/10.1016/j.envpol.2021.117285</a>       | Freshwater            | República Popular China | Dfa     | Not                                           |
| Science-Direct | Ecological Engineering,                 | Yang Feng, Xuexiu Chang, Lixing Zhao, Xiuping Li, Wenjun Li, Yi Jiang,                                                                                                                      | 2013 | Nanaomycin A methyl ester, an actinomycete metabolite: Algicidal activity and the physiological response of <i>Microcystis aeruginosa</i> ,                                                                              | <a href="https://www.sciencedirect.com/science/article/pii/S0925857412004211">https://www.sciencedirect.com/science/article/pii/S0925857412004211</a> | <a href="https://doi.org/10.1016/j.ecoleng.2012.12.066">https://doi.org/10.1016/j.ecoleng.2012.12.066</a>     | Freshwater            | República Popular China | Csb     | Yes                                           |
| Science-Direct | Ecotoxicology and Environmental Safety, | Raquel Aparecida Moreira, Giseli Swerts Rocha, Laís Conceição Meneses da Silva, Bianca Veloso Goulart, Cassiana Carolina Montagner, Maria da Graça Gama Melão, Evaldo Luiz Gaeta Espindola, | 2020 | Exposure to environmental concentrations of fipronil and 2,4-D mixtures causes physiological, morphological and biochemical changes in <i>Raphidocelis subcapitata</i>                                                   | <a href="https://www.sciencedirect.com/science/article/pii/S0147651320310198">https://www.sciencedirect.com/science/article/pii/S0147651320310198</a> | <a href="https://doi.org/10.1016/j.ecoenv.2020.111180">https://doi.org/10.1016/j.ecoenv.2020.111180</a>       | Freshwater            | Brasil                  | Cwa     | Not                                           |
| Science-Direct | Journal of Environmental Sciences,      | Xia Hu, Jiti Zhou, Guangfei Liu, Bing Gui,                                                                                                                                                  | 2016 | Selection of microalgae for high CO2 fixation efficiency and lipid accumulation from ten <i>Chlorella</i> strains using municipal wastewater,                                                                            | <a href="https://www.sciencedirect.com/science/article/pii/S1001074216300456">https://www.sciencedirect.com/science/article/pii/S1001074216300456</a> | <a href="https://doi.org/10.1016/j.jes.2015.08.030">https://doi.org/10.1016/j.jes.2015.08.030</a>             | Freshwater            | República Popular China | Dwb     | Not                                           |
| Science-Direct | Aquatic Toxicology,                     | Muris Korkaric, Renata Behra, Beat B. Fischer, Marion Junghans, Rik I.L. Eggen,                                                                                                             | 2015 | Multiple stressor effects in <i>Chlamydomonas reinhardtii</i> – Toward understanding mechanisms of interaction between effects of ultraviolet radiation and chemical pollutants,                                         | <a href="https://www.sciencedirect.com/science/article/pii/S0166445X15000685">https://www.sciencedirect.com/science/article/pii/S0166445X15000685</a> | <a href="https://doi.org/10.1016/j.aquatox.2015.03.001">https://doi.org/10.1016/j.aquatox.2015.03.001</a>     | Marine and Freshwater | Suíza                   | Cfa     | Not                                           |

| Platforms      | Journal                                 | Author                                                                                                                      | Year | Title                                                                                                                                              | URL                                                                                                                                                   | Doi                                                                                                           | Type of environment   | Country                 | Climate | Mention the process of eutrophication studies |
|----------------|-----------------------------------------|-----------------------------------------------------------------------------------------------------------------------------|------|----------------------------------------------------------------------------------------------------------------------------------------------------|-------------------------------------------------------------------------------------------------------------------------------------------------------|---------------------------------------------------------------------------------------------------------------|-----------------------|-------------------------|---------|-----------------------------------------------|
| Science-Direct | Renewable Energy,                       | Zhen Xie, Haiyan Pei, Lijie Zhang, Zhigang Yang, Changliang Nie, Qingjie Hou, Ze Yu,                                        | 2020 | Accelerating lipid production in freshwater alga <i>Chlorella sorokiniana</i> SDEC-18 by seawater and ultrasound during the stationary phase,      | <a href="https://www.sciencedirect.com/science/article/pii/S0960148120311149">https://www.sciencedirect.com/science/article/pii/S0960148120311149</a> | <a href="https://doi.org/10.1016/j.renene.2020.07.038">https://doi.org/10.1016/j.renene.2020.07.038</a>       | Marine and Freshwater | República Popular China | Dfa     | Not                                           |
| Science-Direct | Science of The Total Environment,       | Didier L. Baho, Francesco Pomati, Eva Leu, Dag O. Hessen, S. Jannicke Moe, Jon Norberg, Luca Nizzetto,                      | 2019 | A single pulse of diffuse contaminants alters the size distribution of natural phytoplankton communities,                                          | <a href="https://www.sciencedirect.com/science/article/pii/S0048969719322685">https://www.sciencedirect.com/science/article/pii/S0048969719322685</a> | <a href="https://doi.org/10.1016/j.scitotenv.2019.05.229">https://doi.org/10.1016/j.scitotenv.2019.05.229</a> | Freshwater            | Noruega                 | Dfb     | Not                                           |
| Science-Direct | Ecotoxicology and Environmental Safety, | Yingxiang Du, Jing Wang, Fengyi Zhu, Dina Mai, Zhongrun Xiang, Jianqiu Chen, Ruixin Guo,                                    | 2018 | Comprehensive assessment of three typical antibiotics on cyanobacteria ( <i>Microcystis aeruginosa</i> ): The impact and recovery capability,      | <a href="https://www.sciencedirect.com/science/article/pii/S0147651318304135">https://www.sciencedirect.com/science/article/pii/S0147651318304135</a> | <a href="https://doi.org/10.1016/j.ecoenv.2018.05.035">https://doi.org/10.1016/j.ecoenv.2018.05.035</a>       | Freshwater            | República Popular China | Cfa     | Not                                           |
| Science-Direct | Journal of Water Process Engineering,   | Chaofan Zhang, Shih-Hsin Ho, Anran Li, Liang Fu, Dandan Zhou,                                                               | 2021 | Co-culture of <i>Chlorella</i> and <i>Scenedesmus</i> could enhance total lipid production under bacteria quorum sensing molecule stress,          | <a href="https://www.sciencedirect.com/science/article/pii/S2214714420306164">https://www.sciencedirect.com/science/article/pii/S2214714420306164</a> | <a href="https://doi.org/10.1016/j.jwpe.2020.101739">https://doi.org/10.1016/j.jwpe.2020.101739</a>           | Freshwater            | República Popular China | Cfa     | Not                                           |
| Science-Direct | Science of The Total Environment,       | Marta Esperanza, Marta Seoane, Carmen Rioboo, Concepción Herrero, Ángeles Cid,                                              | 2019 | Differential toxicity of the UV-filters BP-3 and BP-4 in <i>Chlamydomonas reinhardtii</i> : A flow cytometric approach,                            | <a href="https://www.sciencedirect.com/science/article/pii/S0048969719310976">https://www.sciencedirect.com/science/article/pii/S0048969719310976</a> | <a href="https://doi.org/10.1016/j.scitotenv.2019.03.116">https://doi.org/10.1016/j.scitotenv.2019.03.116</a> | Freshwater            | España                  | Cfb     | Not                                           |
| Science-Direct | Ecotoxicology and Environmental Safety, | Raquel Prado, Carmen Rioboo, Concepción Herrero, Ángeles Cid,                                                               | 2012 | Screening acute cytotoxicity biomarkers using a microalga as test organism,                                                                        | <a href="https://www.sciencedirect.com/science/article/pii/S0147651312003168">https://www.sciencedirect.com/science/article/pii/S0147651312003168</a> | <a href="https://doi.org/10.1016/j.jhazmat.2021.126084">https://doi.org/10.1016/j.jhazmat.2021.126084</a>     | Freshwater            | España                  | Csb     | Not                                           |
| Science-Direct | Biomass and Bioenergy,                  | Byung-Hyuk Kim, Rishiram Ramanan, Zion Kang, Dae-Hyun Cho, Hee-Mock Oh, Hee-Sik Kim,                                        | 2016 | <i>Chlorella sorokiniana</i> HS1, a novel freshwater green algal strain, grows and hyperaccumulates lipid droplets in seawater salinity,           | <a href="https://www.sciencedirect.com/science/article/pii/S0961953415301987">https://www.sciencedirect.com/science/article/pii/S0961953415301987</a> | <a href="https://doi.org/10.1016/j.biombioe.2015.12.026">https://doi.org/10.1016/j.biombioe.2015.12.026</a>   | Marine and Freshwater | Corea del Sur           | Dfa     | Not                                           |
| Science-Direct | Environmental and Experimental Botany,  | Surbhi Kharwar, Arun Kumar Mishra,                                                                                          | 2020 | Unraveling the complexities underlying sulfur deficiency and starvation in the cyanobacterium <i>Anabaena</i> sp. PCC 7120,                        | <a href="https://www.sciencedirect.com/science/article/pii/S0098847219315643">https://www.sciencedirect.com/science/article/pii/S0098847219315643</a> | <a href="https://doi.org/10.1016/j.envexpbot.2019.103966">https://doi.org/10.1016/j.envexpbot.2019.103966</a> | Marine and Freshwater | India                   | Csa     | Not                                           |
| Science-Direct | Environmental Pollution,                | Liu Yang, Fengkui Duan, Hua Tian, Kebin He, Yongliang Ma, Tao Ma, Hui Li, Shuo Yang, Lidan Zhu,                             | 2019 | Biotoxicity of water-soluble species in PM2.5 using <i>Chlorella</i> ,                                                                             | <a href="https://www.sciencedirect.com/science/article/pii/S0269749119300508">https://www.sciencedirect.com/science/article/pii/S0269749119300508</a> | <a href="https://doi.org/10.1016/j.envpol.2019.04.017">https://doi.org/10.1016/j.envpol.2019.04.017</a>       | Freshwater            | República Popular China | Dfa     | Not                                           |
| Redalyc        | Orinoquia                               | Caroll E. Cortés - Castillo, Julián Sánchez-Villarraga, Jorge Padilla, Angélica M. Otero-Paternina Martha L. Ortiz- Moreno, | 2012 | Evaluación del crecimiento de la microalga <i>chlorella sorokiniana</i> en diferentes medios de cultivo en condiciones autotróficas y mixotróficas | <a href="https://www.redalyc.org/pdf/896/89625076002.pdf">https://www.redalyc.org/pdf/896/89625076002.pdf</a>                                         |                                                                                                               | Freshwater            | Colombia                | Am      | Yes                                           |



| Platforms | Journal                                    | Author                                                                                                      | Year | Title                                                                                                                                | URL                                                                                                                                           | Doi                                                                                     | Type of environment   | Country     | Climate | Mention the process of eutrophication studies |
|-----------|--------------------------------------------|-------------------------------------------------------------------------------------------------------------|------|--------------------------------------------------------------------------------------------------------------------------------------|-----------------------------------------------------------------------------------------------------------------------------------------------|-----------------------------------------------------------------------------------------|-----------------------|-------------|---------|-----------------------------------------------|
| Redalyc   | Revista Colombiana de Biotecnología        | Nelson Valero Valero, Ever Morales Avendaño Liliana Cecilia Gómez Gómez,                                    | 2012 | Bacterias halotolerantes/alcalofilas productoras de ácido indolacético (AIA) asociadas a <i>Arthrospira platensis</i> (Cyanophyceae) | <a href="https://www.redalyc.org/pdf/776/77625517009.pdf">https://www.redalyc.org/pdf/776/77625517009.pdf</a>                                 |                                                                                         | Freshwater            | Colombia    | Bsh     | Yes                                           |
| Redalyc   | Orinoquia                                  | Juan A Ramírez-Merlano, Javier A Jiménez-Forero Cristian A Burgos-Rada,                                     | 2016 | Uso de fertilizante comercial en la cinética celular de <i>Desmodesmus opoliensis</i> (Chlorophyceae) reporte preliminar             | <a href="https://www.redalyc.org/pdf/896/89659214003.pdf">https://www.redalyc.org/pdf/896/89659214003.pdf</a>                                 |                                                                                         | Freshwater            | Colombia    | Am      | Not                                           |
| Redalyc   | Revista MVZ Córdoba                        | Litia De la Cruz, Mario Morales Martha Prieto,                                                              | 2006 | Cultivo experimental del cladocero <i>Moina sp</i> alimentado con <i>Ankistrodesmus sp</i> y <i>Saccharomyces cerevisiae</i>         | <a href="https://www.redalyc.org/pdf/693/69311104.pdf">https://www.redalyc.org/pdf/693/69311104.pdf</a>                                       |                                                                                         | Freshwater            | Colombia    | Aw      | Not                                           |
| Redalyc   | Acta Biológica Colombiana                  | Jae Diana PAREDES RODRÍGUEZ, Juan Carlos CASTRO GÓMEZ Marianela COBOS RUIZ,                                 | 2016 | Inducción de la producción de lípidos totales en microalgas sometidas a estrés nutritivo                                             | <a href="https://www.redalyc.org/pdf/3190/319043374002.pdf">https://www.redalyc.org/pdf/3190/319043374002.pdf</a>                             |                                                                                         | Freshwater            | Perú        | Af      | Not                                           |
| Redalyc   | Ecología Aplicada                          | Juan Carlos Castro Gómez, Luis Alexander Cerdeira Gutierrez Marianela Cobos Ruiz,                           | 2014 | Potencial biotecnológico para la producción sustentable de biodiesel de microalgas oleaginosas aisladas del río itaya loreto Perú    | <a href="https://www.redalyc.org/pdf/341/34132815011.pdf">https://www.redalyc.org/pdf/341/34132815011.pdf</a>                                 |                                                                                         | Freshwater            | Perú        | Af      | Not                                           |
| Redalyc   | Revista de Biología Tropical               | Margarito Tapia-García, Ma. Del Carmen González-Macias, Ma. Guadalupe Figueroa-Torres José L. Moreno-Ruiz,  | 2008 | Fitoplancton del río Tehuantepec Oaxaca México y algunas relaciones biogeográficas                                                   | <a href="https://www.redalyc.org/pdf/449/44918831003.pdf">https://www.redalyc.org/pdf/449/44918831003.pdf</a>                                 |                                                                                         | Freshwater            | México      | Cfa     | Not                                           |
| Redalyc   | Biota Colombiana                           | Esnedy Hernández, Diana María Agudelo, Nestor Jaime Aguirre, Fabio de Jesús Vélez Ana María Zabala-Agudelo, | 2019 | Variación temporal de la morfología funcional del fitoplancton en una planicie inundable del Caribe Colombiano                       | <a href="https://www.redalyc.org/journal/491/49162371002/49162371002.pdf">https://www.redalyc.org/journal/491/49162371002/49162371002.pdf</a> | <a href="https://doi.org/10.21068/c2019.v20n02a01">doi.org/10.21068/c2019.v20n02a01</a> | Freshwater            | Colombia    | Am      | Not                                           |
| WOS       | BIORESOURCE TECHNOLOGY                     | Dean, AP; Sigee, DC; Estrada, B; Pittman, JK                                                                | 2010 | Using FTIR spectroscopy for rapid determination of lipid accumulation in response to nitrogen limitation in freshwater microalgae    | <a href="http://dx.doi.org/10.1016/j.biortech.2010.01.065">http://dx.doi.org/10.1016/j.biortech.2010.01.065</a>                               | 10.1016/j.biortech.2010.01.065                                                          | Freshwater            | Reino Unido | Cfb     | Not                                           |
| WOS       | ENVIRONMENTAL TOXICOLOGY AND CHEMISTRY     | KENT, RA; CURRIE, D                                                                                         | 1995 | Predicting algal sensitivity to a pesticide stress                                                                                   | <a href="http://dx.doi.org/10.1002/etc.5620140609">http://dx.doi.org/10.1002/etc.5620140609</a>                                               | 10.1002/etc.5620140609                                                                  | Freshwater            | Canadá      | Dfb     | Not                                           |
| WOS       | BIOCHIMICA ET BIOPHYSICA ACTA-BIOMEMBRANES | Arnold, AA; Genard, B; Zito, F; Tremblay, R; Warschawski, DE; Marcotte, I                                   | 2015 | Identification of lipid and saccharide constituents of whole microalgal cells by C-13 solid-state NMR                                | <a href="http://dx.doi.org/10.1016/j.bbamem.2014.07.017">http://dx.doi.org/10.1016/j.bbamem.2014.07.017</a>                                   | 10.1016/j.bbamem.2014.07.017                                                            | Marine and freshwater | Canadá      | Dfb     | Not                                           |

| Platforms | Journal                           | Author                                                             | Year | Title                                                                                                                                             | URL                                                                                                                                                                                                                                                                                                                                                   | Doi                              | Type of environment | Country                 | Climate | Mention the process of eutrophication studies |
|-----------|-----------------------------------|--------------------------------------------------------------------|------|---------------------------------------------------------------------------------------------------------------------------------------------------|-------------------------------------------------------------------------------------------------------------------------------------------------------------------------------------------------------------------------------------------------------------------------------------------------------------------------------------------------------|----------------------------------|---------------------|-------------------------|---------|-----------------------------------------------|
| WOS       | JOURNAL OF APPLIED PHYCOLOGY      | Fan, PP; Xu, PP; Zhu, YX; Tu, XJ; Song, GF; Zuo, YX; Bi, YH        | 2022 | Addition of humic acid accelerates the growth of <i>Euglena pisciformis</i> AEW501 and the accumulation of lipids                                 | <a href="http://dx.doi.org/10.1007/s10811-021-02623-9">http://dx.doi.org/10.1007/s10811-021-02623-9</a>                                                                                                                                                                                                                                               | 10.1007/s10811-021-02623-9       | Freshwater          | República Popular China | Cfa     | Not                                           |
| WOS       | FRESHWATER BIOLOGY                | Bec, A; Perga, ME; Desvillettes, C; Bourdier, G                    | 2010 | How well can the fatty acid content of lake seston be predicted from its taxonomic composition?                                                   | <a href="http://dx.doi.org/10.1111/j.1365-2427.2010.02429.x">http://dx.doi.org/10.1111/j.1365-2427.2010.02429.x</a>                                                                                                                                                                                                                                   | 10.1111/j.1365-2427.2010.02429.x | Freshwater          | Francia                 | Cfb     | Not                                           |
| WOS       | FRESHWATER BIOLOGY                | Kilham, SS; Kreeger, DA; Goulden, CE; Lynn, SG                     | 1997 | Effects of nutrient limitation on biochemical constituents of <i>Ankistrodesmus falcatus</i>                                                      | <a href="http://dx.doi.org/10.1046/j.1365-2427.1997.00231.x">http://dx.doi.org/10.1046/j.1365-2427.1997.00231.x</a>                                                                                                                                                                                                                                   | 10.1046/j.1365-2427.1997.00231.x | Freshwater          | Estados Unidos          | Cfa     | Not                                           |
| WOS       | PHYCOLOGIA                        | Sigee, DC; Bahram, F; Estrada, B; Webster, RE; Dean, AP            | 2007 | The influence of phosphorus availability on carbon allocation and P quota in <i>Scenedesmus subspicatus</i> : A synchrotron-based FTIR analysis   | <a href="http://dx.doi.org/10.2216/07-14.1">http://dx.doi.org/10.2216/07-14.1</a>                                                                                                                                                                                                                                                                     | 10.2216/07-14.1                  | Freshwater          | Reino Unido             | Cfb     | Yes                                           |
| Scopus    | Science of the Total Environment  | Liu X., Xie N., Bai M., Li J., Wang G.                             | 2021 | Composition change and decreased diversity of microbial eukaryotes in the coastal upwelling waters of South China Sea                             | <a href="https://www.scopus.com/inward/record.uri?eid=2-s2.0-85109686096&amp;doi=10.1016%2fj.scitotenv.2021.148892&amp;partnerID=40&amp;md5=54b5662de489b21dc66e81163190c122">https://www.scopus.com/inward/record.uri?eid=2-s2.0-85109686096&amp;doi=10.1016%2fj.scitotenv.2021.148892&amp;partnerID=40&amp;md5=54b5662de489b21dc66e81163190c122</a> | 10.1016/j.scitotenv.2021.148892  | Marine              |                         |         |                                               |
| Scopus    | Journal of Phycology              | Li Z., Li W., Zhang Y., Hu Y., Sheward R., Irwin A.J., Finkel Z.V. | 2021 | Dynamic Photophysiological Stress Response of a Model Diatom to Ten Environmental Stresses                                                        | <a href="https://www.scopus.com/inward/record.uri?eid=2-s2.0-85100110073&amp;doi=10.1111%2fjpy.13072&amp;partnerID=40&amp;md5=dc854941e6678748dfe952c2b7ffb5b8">https://www.scopus.com/inward/record.uri?eid=2-s2.0-85100110073&amp;doi=10.1111%2fjpy.13072&amp;partnerID=40&amp;md5=dc854941e6678748dfe952c2b7ffb5b8</a>                             | 10.1111/jpy.13072                | Marine              |                         |         |                                               |
| Scopus    | Frontiers in Marine Science       | Samuels T., Rynearson T.A., Collins S.                             | 2021 | Surviving Heatwaves: Thermal Experience Predicts Life and Death in a Southern Ocean Diatom                                                        | <a href="https://www.scopus.com/inward/record.uri?eid=2-s2.0-85100745014&amp;doi=10.3389%2ffmars.2021.600343&amp;partnerID=40&amp;md5=a867fac38d5adad145903023f0235bd0">https://www.scopus.com/inward/record.uri?eid=2-s2.0-85100745014&amp;doi=10.3389%2ffmars.2021.600343&amp;partnerID=40&amp;md5=a867fac38d5adad145903023f0235bd0</a>             | 10.3389/fmars.2021.600343        | Marine              |                         |         |                                               |
| Scopus    | Frontiers in Microbiology         | Thangaraj S., Palanisamy S.K., Zhang G., Sun J.                    | 2021 | Quantitative Proteomic Profiling of Marine Diatom <i>Skeletonema dohrnii</i> in Response to Temperature and Silicate Induced Environmental Stress | <a href="https://www.scopus.com/inward/record.uri?eid=2-s2.0-85102062663&amp;doi=10.3389%2ffmicb.2020.554832&amp;partnerID=40&amp;md5=69eb68f243bdbb2ab02aa5221ba4007e">https://www.scopus.com/inward/record.uri?eid=2-s2.0-85102062663&amp;doi=10.3389%2ffmicb.2020.554832&amp;partnerID=40&amp;md5=69eb68f243bdbb2ab02aa5221ba4007e</a>             | 10.3389/fmicb.2020.554832        | Marine              |                         |         |                                               |
| Scopus    | African Journal of Marine Science | Acheampong E., Mantey P., Weremfo A.                               | 2021 | Potential impact of marine heatwaves on selected phytoplankton adapted to the Gulf of Guinea during stable hydrographic periods                   | <a href="https://www.scopus.com/inward/record.uri?eid=2-s2.0-85103362792&amp;doi=10.2989%2f1814232X">https://www.scopus.com/inward/record.uri?eid=2-s2.0-85103362792&amp;doi=10.2989%2f1814232X</a>                                                                                                                                                   | 10.2989/1814232X.2021.1879267    | Marine              |                         |         |                                               |

| Platforms | Journal                                            | Author                                                                                     | Year | Title                                                                                                                                                        | URL                                                                                                                                                                                                                                                                                                                                                     | Doi                             | Type of environment | Country | Climate | Mention the process of eutrophication studies |
|-----------|----------------------------------------------------|--------------------------------------------------------------------------------------------|------|--------------------------------------------------------------------------------------------------------------------------------------------------------------|---------------------------------------------------------------------------------------------------------------------------------------------------------------------------------------------------------------------------------------------------------------------------------------------------------------------------------------------------------|---------------------------------|---------------------|---------|---------|-----------------------------------------------|
|           |                                                    |                                                                                            |      |                                                                                                                                                              | <a href="#">2021.1879267&amp;part-nerID=40&amp;md5=6a32c5715f352dc971a65cc72b9cabf4</a>                                                                                                                                                                                                                                                                 |                                 |                     |         |         |                                               |
| Scopus    | Microbial Ecology                                  | González-Olalla J.M., Medina-Sánchez J.M., Norici A., Carrillo P.                          | 2021 | Regulation of Phagotrophy by Prey, Low Nutrients, and Low Light in the Mixotrophic Haptophyte Isochrysis galbana                                             | <a href="https://www.scopus.com/inward/record.uri?eid=2-s2.0-85102181795&amp;doi=10.1007%2fs00248-021-01723-w&amp;part-nerID=40&amp;md5=863638f70900514bd6fdb3c858eae795">https://www.scopus.com/inward/record.uri?eid=2-s2.0-85102181795&amp;doi=10.1007%2fs00248-021-01723-w&amp;part-nerID=40&amp;md5=863638f70900514bd6fdb3c858eae795</a>           | 10.1007/s00248-021-01723-w      | Marine              |         |         |                                               |
| Scopus    | Journal of Phycology                               | Nakov T., Judy K.J., Downey K.M., Ruck E.C., Alverson A.J.                                 | 2020 | Transcriptional Response of Osmolyte Synthetic Pathways and Membrane Transporters in a Euryhaline Diatom During Long-term Acclimation to a Salinity Gradient | <a href="https://www.scopus.com/inward/record.uri?eid=2-s2.0-85090825099&amp;doi=10.1111%2fjpy.13061&amp;part-nerID=40&amp;md5=815ad45dfb0774aa23836a0e94f909b8">https://www.scopus.com/inward/record.uri?eid=2-s2.0-85090825099&amp;doi=10.1111%2fjpy.13061&amp;part-nerID=40&amp;md5=815ad45dfb0774aa23836a0e94f909b8</a>                             | 10.1111/jpy.13061               | Marine              |         |         |                                               |
| Scopus    | Elementa                                           | Amiriaux R., Burot C., Bonin P., Massé G., Guasco S., Babin M., Vaultier F., Rontani J.-F. | 2020 | Stress factors resulting from the Arctic vernal sea-ice melt: Impact on the viability of bacterial communities associated with sympagic algae                | <a href="https://www.scopus.com/inward/record.uri?eid=2-s2.0-85098474258&amp;doi=10.1525%2felementa.076&amp;part-nerID=40&amp;md5=7354b0caaa41df9d993e1810a06a5a2e">https://www.scopus.com/inward/record.uri?eid=2-s2.0-85098474258&amp;doi=10.1525%2felementa.076&amp;part-nerID=40&amp;md5=7354b0caaa41df9d993e1810a06a5a2e</a>                       | 10.1525/elementa.076            | Marine              |         |         |                                               |
| Scopus    | Evolutionary Applications                          | Jin P., González G., Agustí S.                                                             | 2020 | Long-term exposure to increasing temperature can offset predicted losses in marine food quality (fatty acids) caused by ocean warming                        | <a href="https://www.scopus.com/inward/record.uri?eid=2-s2.0-85088588762&amp;doi=10.1111%2feva.13059&amp;part-nerID=40&amp;md5=1e2753b3c5da4aa99d8f944b861f80b0">https://www.scopus.com/inward/record.uri?eid=2-s2.0-85088588762&amp;doi=10.1111%2feva.13059&amp;part-nerID=40&amp;md5=1e2753b3c5da4aa99d8f944b861f80b0</a>                             | 10.1111/eva.13059               | Marine              |         |         |                                               |
| Scopus    | Journal of Experimental Marine Biology and Ecology | Hernando M., Varela D.E., Malanga G., Almandoz G.O., Schloss I.R.                          | 2020 | Effects of climate-induced changes in temperature and salinity on phytoplankton physiology and stress responses in coastal Antarctica                        | <a href="https://www.scopus.com/inward/record.uri?eid=2-s2.0-85085615022&amp;doi=10.1016%2fj.jembe.2020.151400&amp;part-nerID=40&amp;md5=79f5fb82cac684c09d7c88fc6789d829">https://www.scopus.com/inward/record.uri?eid=2-s2.0-85085615022&amp;doi=10.1016%2fj.jembe.2020.151400&amp;part-nerID=40&amp;md5=79f5fb82cac684c09d7c88fc6789d829</a>         | 10.1016/j.jembe.2020.151400     | Marine              |         |         |                                               |
| Scopus    | Science of the Total Environment                   | Gomes T., Almeida A.C., Georantzopoulou A.                                                 | 2020 | Characterization of cell responses in Rhodomonas baltica exposed to PMMA nanoplastics                                                                        | <a href="https://www.scopus.com/inward/record.uri?eid=2-s2.0-85083332156&amp;doi=10.1016%2fj.scitotenv.2020.138547&amp;part-nerID=40&amp;md5=7ffa364dec45c354f62e73024a5b44ee">https://www.scopus.com/inward/record.uri?eid=2-s2.0-85083332156&amp;doi=10.1016%2fj.scitotenv.2020.138547&amp;part-nerID=40&amp;md5=7ffa364dec45c354f62e73024a5b44ee</a> | 10.1016/j.scitotenv.2020.138547 | Marine              |         |         |                                               |



| Platforms | Journal                                            | Author                                                                                     | Year | Title                                                                                                                                                           | URL                                                                                                                                                                                                                                                                                                                                                 | Doi                           | Type of environment | Country | Climate | Mention the process of eutrophication studies |
|-----------|----------------------------------------------------|--------------------------------------------------------------------------------------------|------|-----------------------------------------------------------------------------------------------------------------------------------------------------------------|-----------------------------------------------------------------------------------------------------------------------------------------------------------------------------------------------------------------------------------------------------------------------------------------------------------------------------------------------------|-------------------------------|---------------------|---------|---------|-----------------------------------------------|
| Scopus    | Journal of Applied Phycology                       | Ishika T., Laird D.W., Bahri P.A., Moheimani N.R.                                          | 2019 | Co-cultivation and stepwise cultivation of Chaetoceros muelleri and Amphora sp. for fucoxanthin production under gradual salinity increase                      | <a href="https://www.scopus.com/inward/record.uri?eid=2-s2.0-85059685672&amp;doi=10.1007%2fs10811-018-1718-5&amp;part-nerID=40&amp;md5=21384619d8997e9e5cb2b20d06d35508">https://www.scopus.com/inward/record.uri?eid=2-s2.0-85059685672&amp;doi=10.1007%2fs10811-018-1718-5&amp;part-nerID=40&amp;md5=21384619d8997e9e5cb2b20d06d35508</a>         | 10.1007/s10811-018-1718-5     | Marine              |         |         |                                               |
| Scopus    | Frontiers in Microbiology                          | Severin T., Erdner D.L.                                                                    | 2019 | The phytoplankton taxon-dependent oil response and its microbiome: Correlation but not causation                                                                | <a href="https://www.scopus.com/inward/record.uri?eid=2-s2.0-85066489972&amp;doi=10.3389%2ffmicb.2019.00385&amp;part-nerID=40&amp;md5=1be76e3a4d237f956fa719f5832cb821">https://www.scopus.com/inward/record.uri?eid=2-s2.0-85066489972&amp;doi=10.3389%2ffmicb.2019.00385&amp;part-nerID=40&amp;md5=1be76e3a4d237f956fa719f5832cb821</a>           | 10.3389/fmicb.2019.00385      | Marine              |         |         |                                               |
| Scopus    | Ecological Indicators                              | Feijão E., Gameiro C., Franzitta M., Duarte B., Caçador I., Cabrita M.T., Matos A.R.       | 2018 | Heat wave impacts on the model diatom Phaeodactylum tricornutum: Searching for photochemical and fatty acid biomarkers of thermal stress                        | <a href="https://www.scopus.com/inward/record.uri?eid=2-s2.0-85027219876&amp;doi=10.1016%2fj.ecolind.2017.07.058&amp;part-nerID=40&amp;md5=ea56cd2f1059682aa1b75c88b78e790e">https://www.scopus.com/inward/record.uri?eid=2-s2.0-85027219876&amp;doi=10.1016%2fj.ecolind.2017.07.058&amp;part-nerID=40&amp;md5=ea56cd2f1059682aa1b75c88b78e790e</a> | 10.1016/j.ecolind.2017.07.058 | Marine              |         |         |                                               |
| Scopus    | Journal of Eukaryotic Microbiology                 | Fujise L., Nitschke M.R., Frommlet J.C., Serôdio J., Woodcock S., Ralph P.J., Suggett D.J. | 2018 | Cell Cycle Dynamics of Cultured Coral Endosymbiotic Microalgae (Symbiodinium) Across Different Types (Species) Under Alternate Light and Temperature Conditions | <a href="https://www.scopus.com/inward/record.uri?eid=2-s2.0-85041226023&amp;doi=10.1111%2fjeu.12497&amp;part-nerID=40&amp;md5=31225b4b6ffff7230cca8b127e33d9cd">https://www.scopus.com/inward/record.uri?eid=2-s2.0-85041226023&amp;doi=10.1111%2fjeu.12497&amp;part-nerID=40&amp;md5=31225b4b6ffff7230cca8b127e33d9cd</a>                         | 10.1111/jeu.12497             | Marine              |         |         |                                               |
| Scopus    | Journal of Experimental Marine Biology and Ecology | Hernando M., Schloss I.R., Almanoz G.O., Malanga G., Varela D.E., De Troch M.              | 2018 | Combined effects of temperature and salinity on fatty acid content and lipid damage in Antarctic phytoplankton                                                  | <a href="https://www.scopus.com/inward/record.uri?eid=2-s2.0-85044159425&amp;doi=10.1016%2fj.jembe.2018.03.004&amp;part-nerID=40&amp;md5=65ff362994eae08739f2dc9d97da644d">https://www.scopus.com/inward/record.uri?eid=2-s2.0-85044159425&amp;doi=10.1016%2fj.jembe.2018.03.004&amp;part-nerID=40&amp;md5=65ff362994eae08739f2dc9d97da644d</a>     | 10.1016/j.jembe.2018.03.004   | Marine              |         |         |                                               |
| Scopus    | Botanica Marina                                    | Scholz B., Vyverman W., Küpper F.C., Ólafsson H.G., Karsten U.                             | 2017 | Effects of environmental parameters on chytrid infection prevalence of four marine diatoms: A laboratory case study                                             | <a href="https://www.scopus.com/inward/record.uri?eid=2-s2.0-85012887671&amp;doi=10.1515%2fbot-2016-0105&amp;part-nerID=40&amp;md5=7bf7dd80db5c9cae05ddcb7f9ff6ab3">https://www.scopus.com/inward/record.uri?eid=2-s2.0-85012887671&amp;doi=10.1515%2fbot-2016-0105&amp;part-nerID=40&amp;md5=7bf7dd80db5c9cae05ddcb7f9ff6ab3</a>                   | 10.1515/bot-2016-0105         | Marine              |         |         |                                               |
| Scopus    | Applied Chemistry for Engineering                  | Rizwan M., Mujtaba G., Lee K.                                                              | 2017 | Effects of multiple stress factors including iron supply on cell growth and lipid accumulation in marine microalga Dunaliella tertiolecta                       | <a href="https://www.scopus.com/inward/record.uri?eid=2-s2.0-85028309973&amp;doi=10.14478%2face.2017">https://www.scopus.com/inward/record.uri?eid=2-s2.0-85028309973&amp;doi=10.14478%2face.2017</a>                                                                                                                                               | 10.14478/ace.2017.1018        | Marine              |         |         |                                               |

| Platforms | Journal                                            | Author                                                                                         | Year | Title                                                                                                                                                    | URL                                                                                                                                                                                                                                                                                                                                             | Doi                                                                                                 | Type of environment | Country | Climate | Mention the process of eutrophication studies |
|-----------|----------------------------------------------------|------------------------------------------------------------------------------------------------|------|----------------------------------------------------------------------------------------------------------------------------------------------------------|-------------------------------------------------------------------------------------------------------------------------------------------------------------------------------------------------------------------------------------------------------------------------------------------------------------------------------------------------|-----------------------------------------------------------------------------------------------------|---------------------|---------|---------|-----------------------------------------------|
|           |                                                    |                                                                                                |      |                                                                                                                                                          | <a href="#">1018&amp;part-nerID=40&amp;md5=8de54522c92b2dcdbbb50c14761c10df</a>                                                                                                                                                                                                                                                                 |                                                                                                     |                     |         |         |                                               |
| Scopus    | Journal of Phycology                               | Pereira N., Shilova I.N., Zehr J.P.                                                            | 2016 | Molecular markers define progressing stages of phosphorus limitation in the nitrogen-fixing cyanobacterium, Crocosphaera                                 | <a href="https://www.scopus.com/inward/record.uri?eid=2-s2.0-84960153279&amp;doi=10.1111%2fjpy.12396&amp;part-nerID=40&amp;md5=c4450d26ee33bdb63e280d9f5ca0ac18">https://www.scopus.com/inward/record.uri?eid=2-s2.0-84960153279&amp;doi=10.1111%2fjpy.12396&amp;part-nerID=40&amp;md5=c4450d26ee33bdb63e280d9f5ca0ac18</a>                     | 10.1111/jpy.12396                                                                                   | Marine              |         |         |                                               |
| Scopus    | Journal of Environmental Science and Management    | Limates V.G., Cuevas V.C., Tajolosa M.A.T., Benigno E.                                         | 2016 | Phytoplankton abundance and distribution in selected sites of Boracay Island, Malay, Aklan, central Philippines                                          | <a href="https://www.scopus.com/inward/record.uri?eid=2-s2.0-85043468226&amp;part-nerID=40&amp;md5=c28895c000b0b390e750da49c5e4a768">https://www.scopus.com/inward/record.uri?eid=2-s2.0-85043468226&amp;part-nerID=40&amp;md5=c28895c000b0b390e750da49c5e4a768</a>                                                                             | <a href="https://doi.org/10.47125/jesam/2016_sp2/01">https://doi.org/10.47125/jesam/2016_sp2/01</a> | Marine              |         |         |                                               |
| Scopus    | Journal of Experimental Marine Biology and Ecology | Hernando M., Schloss I.R., Malanga G., Almandoz G.O., Ferreyra G.A., Aguiar M.B., Puntarulo S. | 2015 | Effects of salinity changes on coastal Antarctic phytoplankton physiology and assemblage composition                                                     | <a href="https://www.scopus.com/inward/record.uri?eid=2-s2.0-84924212688&amp;doi=10.1016%2fj.jembe.2015.02.012&amp;part-nerID=40&amp;md5=c01aa395eb333ffdea597c7191825c03">https://www.scopus.com/inward/record.uri?eid=2-s2.0-84924212688&amp;doi=10.1016%2fj.jembe.2015.02.012&amp;part-nerID=40&amp;md5=c01aa395eb333ffdea597c7191825c03</a> | 10.1016/j.jembe.2015.02.012                                                                         | Marine              |         |         |                                               |
| Scopus    | Aquatic Ecology                                    | Masmoudi S., Tastard E., Guermazi W., Caruso A., Morant-Manceau A., Ayadi H.                   | 2015 | Salinity gradient and nutrients as major structuring factors of the phytoplankton communities in salt marshes                                            | <a href="https://www.scopus.com/inward/record.uri?eid=2-s2.0-84912557399&amp;doi=10.1007%2fs10452-014-9500-5&amp;part-nerID=40&amp;md5=502867a9683dfb204061604d08e87fb1">https://www.scopus.com/inward/record.uri?eid=2-s2.0-84912557399&amp;doi=10.1007%2fs10452-014-9500-5&amp;part-nerID=40&amp;md5=502867a9683dfb204061604d08e87fb1</a>     | 10.1007/s10452-014-9500-5                                                                           | Marine              |         |         |                                               |
| Scopus    | Journal of Experimental Marine Biology and Ecology | Cabrerizo M.J., Carrillo P., Villaña V.E., Walter Helbling E.                                  | 2014 | Current and predicted global change impacts of UVR, temperature and nutrient inputs on photosynthesis and respiration of key marine phytoplankton groups | <a href="https://www.scopus.com/inward/record.uri?eid=2-s2.0-84907682992&amp;doi=10.1016%2fj.jembe.2014.08.022&amp;part-nerID=40&amp;md5=f25a35bc151db8e72335468fd9a0b0a5">https://www.scopus.com/inward/record.uri?eid=2-s2.0-84907682992&amp;doi=10.1016%2fj.jembe.2014.08.022&amp;part-nerID=40&amp;md5=f25a35bc151db8e72335468fd9a0b0a5</a> | 10.1016/j.jembe.2014.08.022                                                                         | Marine              |         |         |                                               |
| Scopus    | Marine Biology                                     | Mayzaud P., Boutoute M., Gasparini S., Mousseau L.                                             | 2014 | Lipids and fatty acid composition of particulate matter in the North Atlantic: Importance of spatial heterogeneity, season and community structure       | <a href="https://www.scopus.com/inward/record.uri?eid=2-s2.0-84907594649&amp;doi=10.1007%2fs00227-014-2476-9&amp;part-nerID=40&amp;md5=183822c608e315fe5c0bf81ba524e88d">https://www.scopus.com/inward/record.uri?eid=2-s2.0-84907594649&amp;doi=10.1007%2fs00227-014-2476-9&amp;part-nerID=40&amp;md5=183822c608e315fe5c0bf81ba524e88d</a>     | 10.1007/s00227-014-2476-9                                                                           | Marine              |         |         |                                               |

| Platforms | Journal                                     | Author                                                             | Year | Title                                                                                                                                                  | URL                                                                                                                                                                                                                                                                                                                                               | Doi                          | Type of environment | Country | Climate | Mention the process of eutrophication studies |
|-----------|---------------------------------------------|--------------------------------------------------------------------|------|--------------------------------------------------------------------------------------------------------------------------------------------------------|---------------------------------------------------------------------------------------------------------------------------------------------------------------------------------------------------------------------------------------------------------------------------------------------------------------------------------------------------|------------------------------|---------------------|---------|---------|-----------------------------------------------|
| Scopus    | ISME Journal                                | Pittera J., Humily F., Thorel M., Grulois D., Garczarek L., Six C. | 2014 | Connecting thermal physiology and latitudinal niche partitioning in marine <i>Synechococcus</i>                                                        | <a href="https://www.scopus.com/inward/record.uri?eid=2-s2.0-84901285420&amp;doi=10.1038%2fismej.2013.228&amp;part-nerID=40&amp;md5=885afeaff406a0ced4b6bc18438237a9">https://www.scopus.com/inward/record.uri?eid=2-s2.0-84901285420&amp;doi=10.1038%2fismej.2013.228&amp;part-nerID=40&amp;md5=885afeaff406a0ced4b6bc18438237a9</a>             | 10.1038/ismej.2013.228       | Marine              |         |         |                                               |
| Scopus    | PLoS ONE                                    | Hardison D.R., Sunda W.G., Shea D., Litaker R.W.                   | 2013 | Increased Toxicity of <i>Karenia brevis</i> during Phosphate Limited Growth: Ecological and Evolutionary Implications                                  | <a href="https://www.scopus.com/inward/record.uri?eid=2-s2.0-84874839168&amp;doi=10.1371%2fjournal.pone.0058545&amp;part-nerID=40&amp;md5=9a47a28ad21e4c2c857bbc1154acf217">https://www.scopus.com/inward/record.uri?eid=2-s2.0-84874839168&amp;doi=10.1371%2fjournal.pone.0058545&amp;part-nerID=40&amp;md5=9a47a28ad21e4c2c857bbc1154acf217</a> | 10.1371/journal.pone.0058545 | Marine              |         |         |                                               |
| Scopus    | PLoS ONE                                    | Li G., Campbell D.A.                                               | 2013 | Rising CO2 Interacts with Growth Light and Growth Rate to Alter Photosystem II Photoinactivation of the Coastal Diatom <i>Thalassiosira pseudonana</i> | <a href="https://www.scopus.com/inward/record.uri?eid=2-s2.0-84873120731&amp;doi=10.1371%2fjournal.pone.0055562&amp;part-nerID=40&amp;md5=0e645e3a551d8d52dc4ecb28b8358c7c">https://www.scopus.com/inward/record.uri?eid=2-s2.0-84873120731&amp;doi=10.1371%2fjournal.pone.0055562&amp;part-nerID=40&amp;md5=0e645e3a551d8d52dc4ecb28b8358c7c</a> | 10.1371/journal.pone.0055562 | Marine              |         |         |                                               |
| Scopus    | Phycologia                                  | Lelong A., Hégaret H., Soudant P., Bates S.S.                      | 2012 | <i>Pseudo-nitzschia</i> (Bacillariophyceae) species, domoic acid and amnesic shellfish poisoning: Revisiting previous paradigms                        | <a href="https://www.scopus.com/inward/record.uri?eid=2-s2.0-84859826686&amp;doi=10.2216%2f11-37.1&amp;part-nerID=40&amp;md5=6e58e219a469b963a6ad27837ddcae1c">https://www.scopus.com/inward/record.uri?eid=2-s2.0-84859826686&amp;doi=10.2216%2f11-37.1&amp;part-nerID=40&amp;md5=6e58e219a469b963a6ad27837ddcae1c</a>                           | 10.2216/11-37.1              | Marine              |         |         |                                               |
| Scopus    | Chinese Journal of Oceanology and Limnology | Liu S., Guo Z., Li T., Huang H., Lin S.                            | 2011 | Photosynthetic efficiency, cell volume, and elemental stoichiometric ratios in <i>Thalassiosira weissflogii</i> under phosphorus limitation            | <a href="https://www.scopus.com/inward/record.uri?eid=2-s2.0-82055196646&amp;doi=10.1007%2fs00343-011-0224-2&amp;part-nerID=40&amp;md5=d34dfb7d8410ef9a47ec87e982b7f767">https://www.scopus.com/inward/record.uri?eid=2-s2.0-82055196646&amp;doi=10.1007%2fs00343-011-0224-2&amp;part-nerID=40&amp;md5=d34dfb7d8410ef9a47ec87e982b7f767</a>       | 10.1007/s00343-011-0224-2    | Marine              |         |         |                                               |
| Scopus    | Plant Physiology                            | Wu H., Cockshutt A.M., McCarthy A., Campbell D.A.                  | 2011 | Distinctive photosystem ii photoinactivation and protein dynamics in marine diatoms                                                                    | <a href="https://www.scopus.com/inward/record.uri?eid=2-s2.0-79961197265&amp;doi=10.1104%2fpp.111.178772&amp;part-nerID=40&amp;md5=d0d7ac396b0719bb867f1f235d7f7c3f">https://www.scopus.com/inward/record.uri?eid=2-s2.0-79961197265&amp;doi=10.1104%2fpp.111.178772&amp;part-nerID=40&amp;md5=d0d7ac396b0719bb867f1f235d7f7c3f</a>               | 10.1104/pp.111.178772        | Marine              |         |         |                                               |
| Scopus    | Plant Physiology                            | Six C., Sherrard R., Lionard M., Roy S., Campbell D.A.             | 2009 | Photosystem II and Pigment Dynamics among ecotypes of the green alga <i>Ostreococcus</i>                                                               | <a href="https://www.scopus.com/inward/record.uri?eid=2-s2.0-70349196793&amp;doi=10.1104%2fpp.109.140566">https://www.scopus.com/inward/record.uri?eid=2-s2.0-70349196793&amp;doi=10.1104%2fpp.109.140566</a>                                                                                                                                     | 10.1104/pp.109.140566        | Marine              |         |         |                                               |

| Platforms     | Journal                                                | Author                                                                                               | Year | Title                                                                                                                                                                                                       | URL                                                                                                                                                                                                                                                                                                                                                     | Doi                                                                                           | Type of environment | Country | Climate | Mention the process of eutrophication studies |
|---------------|--------------------------------------------------------|------------------------------------------------------------------------------------------------------|------|-------------------------------------------------------------------------------------------------------------------------------------------------------------------------------------------------------------|---------------------------------------------------------------------------------------------------------------------------------------------------------------------------------------------------------------------------------------------------------------------------------------------------------------------------------------------------------|-----------------------------------------------------------------------------------------------|---------------------|---------|---------|-----------------------------------------------|
|               |                                                        |                                                                                                      |      |                                                                                                                                                                                                             | <a href="#">0566&amp;part-nerID=40&amp;md5=7c034b6997fec779d86acfe0ee66133a</a>                                                                                                                                                                                                                                                                         |                                                                                               |                     |         |         |                                               |
| Scopus        | Archives of Environmental Contamination and Toxicology | Leitão M.A.D.S., Cardozo K.H.M., Pinto E., Colepicolo P.                                             | 2003 | PCB-induced oxidative stress in the unicellular marine dinoflagellate Lingulodinium polyedrum                                                                                                               | <a href="https://www.scopus.com/inward/record.uri?eid=2-s2.0-0038817870&amp;doi=10.1007%2fs00244-002-0208-5&amp;part-nerID=40&amp;md5=53bf18ad4900cd55ef088927523e2d1e">https://www.scopus.com/inward/record.uri?eid=2-s2.0-0038817870&amp;doi=10.1007%2fs00244-002-0208-5&amp;part-nerID=40&amp;md5=53bf18ad4900cd55ef088927523e2d1e</a>               | 10.1007/s00244-002-0208-5                                                                     | Marine              |         |         |                                               |
| Scopus        | Journal of Plankton Research                           | Rijstenbil J.W.                                                                                      | 2002 | Assessment of oxidative stress in the planktonic diatom Thalassiosira pseudonana in response to UVA and UVB radiation                                                                                       | <a href="https://www.scopus.com/inward/record.uri?eid=2-s2.0-0036915012&amp;doi=10.1093%2fplankt%2f24.12.1277&amp;part-nerID=40&amp;md5=ed87233cb743de715e100b2ba4d5fffc">https://www.scopus.com/inward/record.uri?eid=2-s2.0-0036915012&amp;doi=10.1093%2fplankt%2f24.12.1277&amp;part-nerID=40&amp;md5=ed87233cb743de715e100b2ba4d5fffc</a>           | 10.1093/plankt/24.12.1277                                                                     | Marine              |         |         |                                               |
| Scopus        | Hydrobiologia                                          | Scanlan D.J., Wilson W.H.                                                                            | 1999 | Application of molecular techniques to addressing the role of P as a key effector in marine ecosystems                                                                                                      | <a href="https://www.scopus.com/inward/record.uri?eid=2-s2.0-0033133583&amp;doi=10.1023%2fA%3a1003742528262&amp;part-nerID=40&amp;md5=0c4ee0dd3cefb9d0385cfec6f9f42dc0">https://www.scopus.com/inward/record.uri?eid=2-s2.0-0033133583&amp;doi=10.1023%2fA%3a1003742528262&amp;part-nerID=40&amp;md5=0c4ee0dd3cefb9d0385cfec6f9f42dc0</a>               | 10.1023/A:1003742528262                                                                       | Marine              |         |         |                                               |
| Scopus        | Journal of Phycology                                   | Vaulot D., Birrien J.-L., Marie D., Casotti R., Veldhuis M.J.W., Kraay G.W., Chrétiennot-Dinet M.-J. | 1994 | MORPHOLOGY, PLOIDY, PIGMENT COMPOSITION, AND GENOME SIZE OF CULTURED STRAINS OF PHAEOCYSTIS (PRYMNESIOPHYCEAE)                                                                                              | <a href="https://www.scopus.com/inward/record.uri?eid=2-s2.0-0028191663&amp;doi=10.1111%2fj.0022-3646.1994.01022.x&amp;part-nerID=40&amp;md5=121a034809ab9c53a649876f7e98d0a6">https://www.scopus.com/inward/record.uri?eid=2-s2.0-0028191663&amp;doi=10.1111%2fj.0022-3646.1994.01022.x&amp;part-nerID=40&amp;md5=121a034809ab9c53a649876f7e98d0a6</a> | 10.1111/j.0022-3646.1994.01022.x                                                              | Marine              |         |         |                                               |
| Scopus        | Global Biogeochemical Cycles                           | Schimmelmann A., Tegner M.J.                                                                         | 1991 | Historical oceanographic events reflected in $^{13}\text{C}/^{12}\text{C}$ ratio of total organic carbon in laminated Santa Barbara Basin Sediment                                                          | <a href="https://www.scopus.com/inward/record.uri?eid=2-s2.0-0026279689&amp;doi=10.1029%2f91GB00382&amp;part-nerID=40&amp;md5=10f58fad81a8ae648daffe9c6a789872">https://www.scopus.com/inward/record.uri?eid=2-s2.0-0026279689&amp;doi=10.1029%2f91GB00382&amp;part-nerID=40&amp;md5=10f58fad81a8ae648daffe9c6a789872</a>                               | 10.1029/91GB00382                                                                             | Marine              |         |         |                                               |
| springer-link | Hydrobiologia                                          | Iosu Madariaga                                                                                       | 2002 | Short-term variations in the physiological state of phytoplankton [2pt] in a shallow temperate estuary                                                                                                      | <a href="http://link.springer.com/article/10.1023/A%3A1020391425989">http://link.springer.com/article/10.1023/A%3A1020391425989</a>                                                                                                                                                                                                                     | <a href="https://doi.org/10.1023/A:1020391425989">https://doi.org/10.1023/A:1020391425989</a> | Estuarine           |         |         |                                               |
| springer-link | Marine Biology                                         | C. C. ParrishJ. S. WellsZ. YangP. Dabinett                                                           | 1999 | Growth and lipid composition of scallop juveniles, <i>Placopecten magellanicus</i> , fed the flagellate <i>Isochrysis galbana</i> with varying lipid composition and the diatom <i>Chaetoceros muelleri</i> | <a href="http://link.springer.com/article/10.1007/s002270050486">http://link.springer.com/article/10.1007/s002270050486</a>                                                                                                                                                                                                                             | <a href="https://doi.org/10.1007/s002270050486">https://doi.org/10.1007/s002270050486</a>     | Marine              |         |         |                                               |

| Platforms                     | Journal                                  | Author                                                                                     | Year | Title                                                                                                                                                                                        | URL                                                                                                                                   | Doi                                                                                                 | Type of environment | Country | Climate | Mention the process of eutrophication studies |
|-------------------------------|------------------------------------------|--------------------------------------------------------------------------------------------|------|----------------------------------------------------------------------------------------------------------------------------------------------------------------------------------------------|---------------------------------------------------------------------------------------------------------------------------------------|-----------------------------------------------------------------------------------------------------|---------------------|---------|---------|-----------------------------------------------|
| <a href="#">springer-link</a> | Journal of Applied Phycology             | Francisco J. L. GordilloMadeleine GoutxFelix L. FigueroaF. Xavier Niell                    | 1998 | Effects of light intensity, CO2 and nitrogen supply on lipid class composition of <i>Dunaliella viridis</i>                                                                                  | <a href="http://link.springer.com/article/10.1023/A%3A1008067022973">http://link.springer.com/article/10.1023/A%3A1008067022973</a>   | <a href="https://doi.org/10.1023/A:1008067022973">https://doi.org/10.1023/A:1008067022973</a>       | Saline lakes        |         |         |                                               |
| <a href="#">springer-link</a> | Hydrobiologia                            | A. T. LombardiP. J. Wangersky                                                              | 1995 | Particulate lipid class composition of three marine phytoplankters <i>Chaetoceros gracilis</i> , <i>Isochrysis galbana</i> (Tahiti) and <i>Dunaliella tertiolecta</i> grown in batch culture | <a href="http://link.springer.com/article/10.1007/BF00007853">http://link.springer.com/article/10.1007/BF00007853</a>                 | <a href="https://doi.org/10.1007/BF00007853">https://doi.org/10.1007/BF00007853</a>                 | Marine              |         |         |                                               |
| <a href="#">springer-link</a> | Journal of Applied Phycology             | Eizadora T. YuFrank J. ZendejasPamela D. LaneSara GaucherBlake A. SimmonsTodd W. Lane      | 2009 | Triacylglycerol accumulation and profiling in the model diatoms <i>Thalassiosira pseudonana</i> and <i>Phaeodactylum tricornutum</i> (Bacillariophyceae) during starvation                   | <a href="http://link.springer.com/article/10.1007/s10811-008-9400-y">http://link.springer.com/article/10.1007/s10811-008-9400-y</a>   | <a href="https://doi.org/10.1007/s10811-008-9400-y">https://doi.org/10.1007/s10811-008-9400-y</a>   | Marine              |         |         |                                               |
| <a href="#">springer-link</a> | Environmental Monitoring and Assessment  | Revati HardikarC. K. HarideviAnirudh RamRakhee Khandeparke-rUjwala AmberkarMeena Chauhan   | 2019 | Inter-annual variability of phytoplankton assemblage and <i>Tetraspora gelatinosa</i> bloom from anthropogenically affected harbour, Veraval, India                                          | <a href="http://link.springer.com/article/10.1007/s10661-019-7192-y">http://link.springer.com/article/10.1007/s10661-019-7192-y</a>   | <a href="https://doi.org/10.1007/s10661-019-7192-y">https://doi.org/10.1007/s10661-019-7192-y</a>   | Marine              |         |         |                                               |
| <a href="#">springer-link</a> | Journal of Applied Phycology             | Nagwa Gamal-EI Din Moham-madyYean-Chang ChenAbd-El-Ruhman Aly El-MahdyRania Farag Mohammad | 2005 | Temporal alterations of <i>Nannochloropsis salina</i> (Eustigmatophyceae) grown under aqueous diesel fuel stress                                                                             | <a href="http://link.springer.com/article/10.1007/s10811-005-5510-y">http://link.springer.com/article/10.1007/s10811-005-5510-y</a>   | <a href="https://doi.org/10.1007/s10811-005-5510-y">https://doi.org/10.1007/s10811-005-5510-y</a>   | Marine              |         |         |                                               |
| <a href="#">springer-link</a> | Ecotoxicology                            | Monia RenziLeonilde RoselliAndrea GiovaniSilvano E. FocardiAlberto Basset                  | 2014 | Early warning tools for ecotoxicity assessment based on <i>Phaeodactylum tricornutum</i>                                                                                                     | <a href="http://link.springer.com/article/10.1007/s10646-014-1249-z">http://link.springer.com/article/10.1007/s10646-014-1249-z</a>   | <a href="https://doi.org/10.1007/s10646-014-1249-z">https://doi.org/10.1007/s10646-014-1249-z</a>   | Marine              |         |         |                                               |
| <a href="#">springer-link</a> | Marine Biology                           | P. G. VerityT. J. Smayda                                                                   | 1989 | Nutritional value of <i>Phaeocystis pouchetii</i> (Prymnesiophyceae) and other phytoplankton for <i>Acartia</i> spp. (Copepoda): ingestion, egg production, and growth of nauplii            | <a href="http://link.springer.com/article/10.1007/BF00391955">http://link.springer.com/article/10.1007/BF00391955</a>                 | <a href="https://doi.org/10.1007/BF00391955">https://doi.org/10.1007/BF00391955</a>                 | Marine              |         |         |                                               |
| <a href="#">springer-link</a> | Journal of Applied Phycology             | Rong-Shi ChenLi ZhangFeng-Juan WeiLan-Ying YuanPu ZhaoHe-Yu WangYi-Fu Gong                 | 2021 | Effects of Mn2+ on neutral lipid content, C4 pathway, and related gene expression in <i>Phaeodactylum tricornutum</i>                                                                        | <a href="http://link.springer.com/article/10.1007/s10811-021-02471-7">http://link.springer.com/article/10.1007/s10811-021-02471-7</a> | <a href="https://doi.org/10.1007/s10811-021-02471-7">https://doi.org/10.1007/s10811-021-02471-7</a> | Marine              |         |         |                                               |
| <a href="#">springer-link</a> | Hydrobiologia                            | Mary N. KaggwaMartin GruberSteve Omondi OduorMichael Schagerl                              | 2013 | A detailed time series assessment of the diet of Lesser Flamingos: further explanation for their itinerant behaviour                                                                         | <a href="http://link.springer.com/article/10.1007/s10750-012-1105-1">http://link.springer.com/article/10.1007/s10750-012-1105-1</a>   | <a href="https://doi.org/10.1007/s10750-012-1105-1">https://doi.org/10.1007/s10750-012-1105-1</a>   | Saline lakes        |         |         |                                               |
| <a href="#">springer-link</a> | Hydrobiologia                            | Haley S. GarrisonKam W. Tang                                                               | 2014 | Effects of episodic turbulence on diatom mortality and physiology, with a protocol for the use of Evans Blue stain for live“dead determinations                                              | <a href="http://link.springer.com/article/10.1007/s10750-014-1927-0">http://link.springer.com/article/10.1007/s10750-014-1927-0</a>   | <a href="https://doi.org/10.1007/s10750-014-1927-0">https://doi.org/10.1007/s10750-014-1927-0</a>   | Marine              |         |         |                                               |
| <a href="#">springer-link</a> | Biotechnology and Bioprocess Engineering | Xiaoli HuPinghe YinLing ZhaoQiming Yu                                                      | 2015 | Characterization of cell viability in <i>Phaeocystis globosa</i> cultures exposed to marine algicidal bacteria                                                                               | <a href="http://link.springer.com/article/10.1007/s12257-014-0437-2">http://link.springer.com/article/10.1007/s12257-014-0437-2</a>   | <a href="https://doi.org/10.1007/s12257-014-0437-2">https://doi.org/10.1007/s12257-014-0437-2</a>   | Marine              |         |         |                                               |

| Platforms      | Journal                                             | Author                                                                                                                 | Year | Title                                                                                                                                                                           | URL                                                                                                                                                   | Doi                                                                                                       | Type of environment | Country | Climate | Mention the process of eutrophication studies |
|----------------|-----------------------------------------------------|------------------------------------------------------------------------------------------------------------------------|------|---------------------------------------------------------------------------------------------------------------------------------------------------------------------------------|-------------------------------------------------------------------------------------------------------------------------------------------------------|-----------------------------------------------------------------------------------------------------------|---------------------|---------|---------|-----------------------------------------------|
| springer-link  | Journal of Ocean University of China                | Dayong LiangXiaodong WangYiping HuoYan WangShaoshan Li                                                                 | 2021 | Differences Between Solitary Cells and Colonial Cells in the Heteromorphic Life Cycle of <i>Phaeocystis globosa</i> : Morphology, Physiology, and Transcriptome                 | <a href="http://link.springer.com/article/10.1007/s11802-021-4684-5">http://link.springer.com/article/10.1007/s11802-021-4684-5</a>                   | <a href="https://doi.org/10.1007/s11802-021-4684-5">https://doi.org/10.1007/s11802-021-4684-5</a>         | Marine              |         |         |                                               |
| springer-link  | Marine Biology                                      | Yun LiuTiantian ChenShuqun SongCaiwen Li                                                                               | 2019 | Variation in biochemical composition during encystment of the planktonic dinoflagellate <i>Akashiwo sanguinea</i> in N-limited cultures                                         | <a href="http://link.springer.com/article/10.1007/s00227-019-3569-2">http://link.springer.com/article/10.1007/s00227-019-3569-2</a>                   | <a href="https://doi.org/10.1007/s00227-019-3569-2">https://doi.org/10.1007/s00227-019-3569-2</a>         | Marine              |         |         |                                               |
| springer-link  | Marine Biology                                      | O. OkuA. Kamatani                                                                                                      | 1995 | Resting spore formation and phosphorus composition of the marine diatom <i>Chaetoceros pseudocurvisetus</i> under various nutrient conditions                                   | <a href="http://link.springer.com/article/10.1007/BF00353630">http://link.springer.com/article/10.1007/BF00353630</a>                                 | <a href="https://doi.org/10.1007/BF00353630">https://doi.org/10.1007/BF00353630</a>                       | Marine              |         |         |                                               |
| springer-link  | Polar Biology                                       | Kyle DilliplaineMarc OggierR. Eric CollinsHajo EickenRolf Grading-erBodil A. Bluhm                                     | 2021 | Crude oil exposure reduces ice algal growth in a sea-ice mesocosm experiment                                                                                                    | <a href="http://link.springer.com/article/10.1007/s00300-021-02818-3">http://link.springer.com/article/10.1007/s00300-021-02818-3</a>                 | <a href="https://doi.org/10.1007/s00300-021-02818-3">https://doi.org/10.1007/s00300-021-02818-3</a>       | Marine              |         |         |                                               |
| springer-link  | Marine Biology                                      | J. W. RijstenbilJ. W. M. DerksenL. J. A. GerringaT. C. W. PoortvlietA. SandeeM. van den BergJ. van DrieJ. A. Wijnholds | 1994 | Oxidative stress induced by copper: defense and damage in the marine planktonic diatom <i>Ditylum brightwellii</i> , grown in continuous cultures with high and low zinc levels | <a href="http://link.springer.com/article/10.1007/BF00354321">http://link.springer.com/article/10.1007/BF00354321</a>                                 | <a href="https://doi.org/10.1007/BF00354321">https://doi.org/10.1007/BF00354321</a>                       | Marine              |         |         |                                               |
| springer-link  | Marine Biology                                      | Norma EstradaCarmen Rodríguez-JaramilloGerardo Contreras-Felipe Ascencio                                               | 2010 | Effects of induced paralysis on hemocytes and tissues of the giant lions-paw scallop by paralyzing shellfish poison                                                             | <a href="http://link.springer.com/article/10.1007/s00227-010-1418-4">http://link.springer.com/article/10.1007/s00227-010-1418-4</a>                   | <a href="https://doi.org/10.1007/s00227-010-1418-4">https://doi.org/10.1007/s00227-010-1418-4</a>         | Marine              |         |         |                                               |
| springer-link  | Polar Biology                                       | Pirjo HuovinenIvÄn GÃmez                                                                                               | 2013 | Photosynthetic characteristics and UV stress tolerance of Antarctic seaweeds along the depth gradient                                                                           | <a href="http://link.springer.com/article/10.1007/s00300-013-1351-3">http://link.springer.com/article/10.1007/s00300-013-1351-3</a>                   | <a href="https://doi.org/10.1007/s00300-013-1351-3">https://doi.org/10.1007/s00300-013-1351-3</a>         | Marine              |         |         |                                               |
| springer-link  | Aquatic Biosystems                                  | Matthew A FuszardPhillip C WrightCatherine A Biggs                                                                     | 2012 | Comparative quantitative proteomics of prochlorococcus ecotypes to a decrease in environmental phosphate concentrations                                                         | <a href="http://link.springer.com/article/10.1186/2046-9063-8-7">http://link.springer.com/article/10.1186/2046-9063-8-7</a>                           | <a href="https://doi.org/10.1186/2046-9063-8-7">https://doi.org/10.1186/2046-9063-8-7</a>                 | Marine              |         |         |                                               |
| Science-Direct | Journal of Experimental Marine Biology and Ecology, | Marcelo Hernando, Diana E. Varela, Gabriela Malanga, Gastón O. Almandoz, Irene R. Schloss,                             | 2020 | Effects of climate-induced changes in temperature and salinity on phytoplankton physiology and stress responses in coastal Antarctica,                                          | <a href="https://www.sciencedirect.com/science/article/pii/S0022098119303521">https://www.sciencedirect.com/science/article/pii/S0022098119303521</a> | <a href="https://doi.org/10.1016/j.jembe.2020.151400">https://doi.org/10.1016/j.jembe.2020.151400</a>     | Marine              |         |         |                                               |
| Science-Direct | Aquatic Toxicology,                                 | Peggy Sargian, Émilien Pelletier, Behzad Mostajir, Gustavo A. Ferreryra, Serge Demers,                                 | 2005 | TBT toxicity on a natural planktonic assemblage exposed to enhanced ultraviolet-B radiation,                                                                                    | <a href="https://www.sciencedirect.com/science/article/pii/S0166445X05000949">https://www.sciencedirect.com/science/article/pii/S0166445X05000949</a> | <a href="https://doi.org/10.1016/j.aquatox.2005.03.019">https://doi.org/10.1016/j.aquatox.2005.03.019</a> | Marine              |         |         |                                               |
| Science-Direct | Ecotoxicology and Environmental Safety,             | Yuxin Liu, Yu Liu, Dian Jiao, Chao Lu, Yadi Lou, Na Li, Guoguang Wang, Haixia Wang,                                    | 2021 | Synthesis and release of fatty acids under the interaction of <i>Ulva pertusa</i> and <i>Heterosigma akashiwo</i> by stable isotope analysis,                                   | <a href="https://www.sciencedirect.com/science/article/pii/S0147651320316882">https://www.sciencedirect.com/science/article/pii/S0147651320316882</a> | <a href="https://doi.org/10.1016/j.ecoenv.2020.111852">https://doi.org/10.1016/j.ecoenv.2020.111852</a>   | Marine              |         |         |                                               |



| Platforms      | Journal                                             | Author                                                                                                                                            | Year | Title                                                                                                                                               | URL                                                                                                                                                   | Doi                                                                                                               | Type of environment | Country | Climate | Mention the process of eutrophication studies |
|----------------|-----------------------------------------------------|---------------------------------------------------------------------------------------------------------------------------------------------------|------|-----------------------------------------------------------------------------------------------------------------------------------------------------|-------------------------------------------------------------------------------------------------------------------------------------------------------|-------------------------------------------------------------------------------------------------------------------|---------------------|---------|---------|-----------------------------------------------|
| Science-Direct | Journal of Experimental Marine Biology and Ecology, | D.G. Redalje, E.A. Laws,                                                                                                                          | 1983 | The effects of environmental factors on growth and the chemical and biochemical composition of marine diatoms. I. Light and temperature effects,    | <a href="https://www.sciencedirect.com/science/article/pii/0022098183900138">https://www.sciencedirect.com/science/article/pii/0022098183900138</a>   | <a href="https://doi.org/10.1016/0022-0981(83)90013-8">https://doi.org/10.1016/0022-0981(83)90013-8</a>           | Marine              |         |         |                                               |
| Science-Direct | Science of The Total Environment,                   | Mengchen Lv, Xuexi Tang, Yirong Zhao, Jun Li, Bihan Zhang, Luying Li, Yongshun Jiang, Yan Zhao,                                                   | 2020 | The toxicity, bioaccumulation and debromination of BDE-47 and BDE-209 in Chlorella sp. under multiple exposure modes,                               | <a href="https://www.sciencedirect.com/science/article/pii/S0048969720315990">https://www.sciencedirect.com/science/article/pii/S0048969720315990</a> | <a href="https://doi.org/10.1016/j.scitotenv.2020.138086">https://doi.org/10.1016/j.scitotenv.2020.138086</a>     | Marine              |         |         |                                               |
| Science-Direct | Chemosphere,                                        | Mst Ruhina Margia Khanam, Yohei Shimasaki, Md Zahangir Hosain, Koki Mukai, Michito Tsuyama, Xuchun Qiu, Rumana Tasmin, Hiroshi Goto, Yuji Oshima, | 2017 | Diuron causes sinking retardation and physiochemical alteration in marine diatoms Thalassiosira pseudonana and Skeletonema marinoi-dohrnii complex, | <a href="https://www.sciencedirect.com/science/article/pii/S0045653517302321">https://www.sciencedirect.com/science/article/pii/S0045653517302321</a> | <a href="https://doi.org/10.1016/j.chemosphere.2017.02.054">https://doi.org/10.1016/j.chemosphere.2017.02.054</a> | Marine              |         |         |                                               |
| Science-Direct | Chemosphere,                                        | Marta Seoane, Marta Esperanza, Carmen Rioboo, Concepción Herrero, Ángeles Cid,                                                                    | 2017 | Flow cytometric assay to assess short-term effects of personal care products on the marine microalga Tetraselmis suecica,                           | <a href="https://www.sciencedirect.com/science/article/pii/S004565351631829X">https://www.sciencedirect.com/science/article/pii/S004565351631829X</a> | <a href="https://doi.org/10.1016/j.chemosphere.2016.12.097">https://doi.org/10.1016/j.chemosphere.2016.12.097</a> | Marine              |         |         |                                               |
| Science-Direct | Journal of Experimental Marine Biology and Ecology, | Stephanie Mixson Byrd, JoAnn M. Burkholder, Paul V. Zimba,                                                                                        | 2017 | Environmental stressors and lipid production by Dunaliella spp. I. Salinity,                                                                        | <a href="https://www.sciencedirect.com/science/article/pii/S002209811630226X">https://www.sciencedirect.com/science/article/pii/S002209811630226X</a> | <a href="https://doi.org/10.1016/j.jembe.2016.11.004">https://doi.org/10.1016/j.jembe.2016.11.004</a>             | Marine              |         |         |                                               |
| Redalyc        | Ecología Aplicada                                   | Juan Juscamaita-Morales, Jessie Vargas-Cárdenas, Ricardo Oliveros-Ramos Heidi Sánchez-Torres,                                                     | 2008 | Producción de la microalga <i>Nannochloropsis oculata</i> (droop) hibberd en medios enriquecidos con ensilado biológico de pescado                  | <a href="https://www.redalyc.org/pdf/341/34111584018.pdf">https://www.redalyc.org/pdf/341/34111584018.pdf</a>                                         |                                                                                                                   | Marine              |         |         |                                               |
| Redalyc        | Acta Botanica Mexicana                              | María Eugenia Zamudio-Resendiz María Esther Meave del Castillo,                                                                                   | 2018 | Planktonic algal blooms from 2000 to 2015 in Acapulco Bay Guerrero Mexico                                                                           | <a href="https://www.redalyc.org/journal/574/57466755004/57466755004.pdf">https://www.redalyc.org/journal/574/57466755004/57466755004.pdf</a>         |                                                                                                                   | Marine              |         |         |                                               |
| Redalyc        | Ecología Aplicada                                   | Juan Juscamaita, Jessie Vargas Luzmila Rodríguez,                                                                                                 | 2007 | Efecto del medio em-bokashi en el cultivo de la microalga marina tetraselmis suecica k                                                              | <a href="https://www.redalyc.org/pdf/341/34160213.pdf">https://www.redalyc.org/pdf/341/34160213.pdf</a>                                               |                                                                                                                   | Marine              |         |         |                                               |
| Redalyc        | Revista de Biología Tropical                        | Leandro Bastardo, Roraysi Cortez, Bertha Arredondo-Vega, Lolymar Romero, Patricia Gómez Miguel Guevara,                                           | 2011 | Pastas de Rhodomonas salina (Cryptophyta) como alimento para Brachionus plicatilis (Rotifera)                                                       | <a href="https://www.redalyc.org/pdf/449/44920903006.pdf">https://www.redalyc.org/pdf/449/44920903006.pdf</a>                                         |                                                                                                                   | Marine              |         |         |                                               |
| Redalyc        | Revista de Biología Tropical                        | Miguel Guevara, César Lodeiros, Ever Morales Néstor Rosales-Loaiza,                                                                               | 2008 | Crecimiento y producción de metabolitos de la cianobacteria marina Synechococcus sp. (Chroococcales) en función de la irradiancia                   | <a href="https://www.redalyc.org/pdf/449/44918833001.pdf">https://www.redalyc.org/pdf/449/44918833001.pdf</a>                                         |                                                                                                                   | Marine              |         |         |                                               |
| Redalyc        | UNED Research Journal / Cuadernos de                | Pedro Toledo, Sidey Arias Karen Rodríguez-Núñez,                                                                                                  | 2016 | Aislamiento de dos especies de diatomeas con potencial acuícola (Bacillariophyceae) en el Pacífico de Costa Rica                                    | <a href="https://www.redalyc.org/journal/5156/515653586013/515653586013.pdf">https://www.redalyc.org/journal/5156/515653586013/515653586013.pdf</a>   |                                                                                                                   | Marine              |         |         |                                               |

---

| Platforms | Journal                                   | Author                                                              | Year | Title                                                                                                                   | URL                                                                                                       | Doi                         | Type of environment | Country | Climate | Mention the process of eutrophication studies |
|-----------|-------------------------------------------|---------------------------------------------------------------------|------|-------------------------------------------------------------------------------------------------------------------------|-----------------------------------------------------------------------------------------------------------|-----------------------------|---------------------|---------|---------|-----------------------------------------------|
|           | Investigación UNED                        |                                                                     |      |                                                                                                                         |                                                                                                           |                             |                     |         |         |                                               |
| Redalyc   | Revista MVZ Córdoba                       | Martha J. Mogollon, Ada L. Castro, Luis A. Sierra Martha J. Prieto, | 2005 | Efecto del medio y condiciones de cultivo en la productividad de tres diatomeas marinas con potencial acuícola          | <a href="https://www.redalyc.org/pdf/693/69310104.pdf">https://www.redalyc.org/pdf/693/69310104.pdf</a>   |                             | Marine              |         |         |                                               |
| Redalyc   | Revista de Biología Tropical              | Sandra Loza, Paulo C. Abreu Gladys Margarita Lugioyo,               | 2007 | Biomass distribution of heterotrophic and autotrophic microorganisms                                                    | <a href="https://www.redalyc.org/pdf/449/44955210.pdf">https://www.redalyc.org/pdf/449/44955210.pdf</a>   |                             | Marine              |         |         |                                               |
| WOS       | ISME JOURNAL                              | Roy, S                                                              | 2018 | Distributions of phytoplankton carbohydrate, protein and lipid in the world oceans from satellite ocean colour          | <a href="http://dx.doi.org/10.1038/s41396-018-0054-8">http://dx.doi.org/10.1038/s41396-018-0054-8</a>     | 10.1038/s41396-018-0054-8   | Marine              |         |         |                                               |
| WOS       | ARCHIVES OF PHYSIOLOGY AND BIOCHEMISTRY   | Shamsudin, L                                                        | 1998 | Seasonal variation of fatty acid content in natural microplankton from the Tumpat coastal waters of the South China Sea | <a href="http://dx.doi.org/10.1076/apab.106.3.253.4381">http://dx.doi.org/10.1076/apab.106.3.253.4381</a> | 10.1076/apab.106.3.253.4381 | Marine              |         |         |                                               |
| WOS       | ENVIRONMENTAL TOXICOLOGY AND PHARMACOLOGY | Duan, WY; Meng, FP; Lin, YF; Wang, GS                               | 2017 | Toxicological effects of phenol on four marine microalgae                                                               | <a href="http://dx.doi.org/10.1016/j.etap.2017.04.006">http://dx.doi.org/10.1016/j.etap.2017.04.006</a>   | 10.1016/j.etap.2017.04.006  | Marine              |         |         |                                               |



**Table S2:** Keyword list of global freshwater phytoplankton

| <b>Id</b> | <b>Keyword</b>                          | <b>Occurrences</b> | <b>Total link strength</b> |
|-----------|-----------------------------------------|--------------------|----------------------------|
| 207       | Microalgae                              | 12                 | 49                         |
| 142       | Flow cytometry                          | 7                  | 29                         |
| 245       | Oxidative stress                        | 7                  | 30                         |
| 273       | Phytoplankton                           | 7                  | 35                         |
| 214       | <i>Microcystis aeruginosa</i>           | 6                  | 24                         |
| 7         | Algae                                   | 5                  | 23                         |
| 29        | Antioxidant enzymes                     | 4                  | 15                         |
| 101       | Cyanobacteria                           | 4                  | 17                         |
| 196       | Lipids                                  | 4                  | 18                         |
| 264       | Photosynthesis                          | 4                  | 21                         |
| 339       | Toxicity                                | 4                  | 19                         |
| 30        | Antioxidants                            | 3                  | 12                         |
| 42        | Biodiesel                               | 3                  | 13                         |
| 44        | Biofuel                                 | 3                  | 12                         |
| 48        | Biomass                                 | 3                  | 13                         |
| 80        | <i>Chlorella vulgaris</i>               | 3                  | 14                         |
| 106       | Cytotoxicity                            | 3                  | 12                         |
| 155       | Growth                                  | 3                  | 11                         |
| 194       | Lipid peroxidation                      | 3                  | 15                         |
| 206       | Microalga                               | 3                  | 12                         |
| 247       | Pam fluorometry                         | 3                  | 15                         |
| 298       | <i>Raphidocelis subcapitata</i>         | 3                  | 14                         |
| 302       | Ros                                     | 3                  | 12                         |
| 349       | Ultraviolet radiation                   | 3                  | 16                         |
| 12        | Allelochemicals                         | 2                  | 9                          |
| 45        | Biofuels                                | 2                  | 9                          |
| 47        | Biomarkers                              | 2                  | 9                          |
| 65        | Catalase                                | 2                  | 14                         |
| 68        | Cell density                            | 2                  | 8                          |
| 76        | <i>Chlorella</i>                        | 2                  | 10                         |
| 88        | Chlorophytes                            | 2                  | 10                         |
| 125       | Emerging pollutants                     | 2                  | 8                          |
| 138       | Fatty acids                             | 2                  | 9                          |
| 144       | Fourier transform infrared spectroscopy | 2                  | 9                          |
| 148       | Freshwater phytoplankton                | 2                  | 11                         |
| 170       | Hydrogen peroxide                       | 2                  | 14                         |
| 187       | Lipid                                   | 2                  | 8                          |
| 190       | Lipid classes                           | 2                  | 9                          |
| 209       | Microcystin                             | 2                  | 11                         |
| 211       | Microcystins                            | 2                  | 9                          |
| 213       | <i>Microcystis</i>                      | 2                  | 11                         |
| 218       | Mixotrophy                              | 2                  | 8                          |
| 239       | Nutrient limitation                     | 2                  | 11                         |
| 272       | Physiological response                  | 2                  | 7                          |
| 333       | Temperature                             | 2                  | 10                         |
| 1         | 18s rdna                                | 1                  | 4                          |
| 2         | 3-ketoacyl-acp synthase                 | 1                  | 6                          |
| 3         | Acclimation                             | 1                  | 5                          |
| 4         | Acidophilic microalgae                  | 1                  | 5                          |

| <b>Id</b> | <b>Keyword</b>                 | <b>Occurrences</b> | <b>Total link strength</b> |
|-----------|--------------------------------|--------------------|----------------------------|
| 5         | Actinomycete metabolite        | 1                  | 4                          |
| 6         | Adaptation                     | 1                  | 3                          |
| 8         | Algal bloom                    | 1                  | 3                          |
| 9         | Algal growth                   | 1                  | 4                          |
| 10        | Algal model                    | 1                  | 4                          |
| 11        | Alkaline lake                  | 1                  | 7                          |
| 13        | Allelopathic effect            | 1                  | 5                          |
| 14        | Allelopathy                    | 1                  | 4                          |
| 15        | Amazon                         | 1                  | 4                          |
| 16        | Amazonia                       | 1                  | 3                          |
| 17        | Ammonium                       | 1                  | 8                          |
| 18        | Anabaena                       | 1                  | 4                          |
| 19        | <i>Anabaena</i> sp. Pcc 7120   | 1                  | 6                          |
| 20        | Anatoxin-a                     | 1                  | 5                          |
| 21        | Antarctica                     | 1                  | 4                          |
| 22        | Antibiotic                     | 1                  | 5                          |
| 23        | Antibiotics                    | 1                  | 4                          |
| 24        | Antimicrobial                  | 1                  | 4                          |
| 25        | Antioxidant defense system     | 1                  | 4                          |
| 26        | Antioxidant enzymes            | 1                  | 3                          |
| 27        | Antioxidant enzyme             | 1                  | 5                          |
| 28        | Antioxidant enzyme activity    | 1                  | 5                          |
| 31        | <i>Aphanothece stagnina</i>    | 1                  | 9                          |
| 32        | Aquaculture                    | 1                  | 4                          |
| 33        | Aquatic ecosystem              | 1                  | 4                          |
| 34        | Artemisinin                    | 1                  | 4                          |
| 35        | Associated bacteria            | 1                  | 4                          |
| 36        | Autotrophy                     | 1                  | 4                          |
| 37        | Azithromycin                   | 1                  | 5                          |
| 38        | <i>Bacillus okhensis</i>       | 1                  | 4                          |
| 39        | Bacteria                       | 1                  | 4                          |
| 40        | Biochemical compounds          | 1                  | 4                          |
| 41        | Biodegradation                 | 1                  | 4                          |
| 43        | Biodiversity                   | 1                  | 4                          |
| 46        | Biomarker                      | 1                  | 4                          |
| 49        | Biomolecules                   | 1                  | 5                          |
| 50        | Biophysiological analyzes      | 1                  | 5                          |
| 51        | Biotechnology                  | 1                  | 3                          |
| 52        | Biovolume                      | 1                  | 3                          |
| 53        | Bisphenol a                    | 1                  | 4                          |
| 54        | Bottled waters                 | 1                  | 5                          |
| 55        | <i>Brachionus calyciflorus</i> | 1                  | 5                          |
| 56        | Butyl xanthate                 | 1                  | 4                          |
| 57        | C-allocation                   | 1                  | 6                          |
| 58        | Cadmium                        | 1                  | 9                          |
| 59        | Calcium                        | 1                  | 4                          |
| 60        | Calvin cycle                   | 1                  | 5                          |
| 61        | Carbohydrates                  | 1                  | 4                          |
| 62        | Carbon allocation              | 1                  | 5                          |
| 63        | Carbon dioxide                 | 1                  | 5                          |

| <b>Id</b> | <b>Keyword</b>                          | <b>Occurrences</b> | <b>Total link strength</b> |
|-----------|-----------------------------------------|--------------------|----------------------------|
| 64        | Caspase-3-like activity                 | 1                  | 5                          |
| 66        | Cell cycle                              | 1                  | 4                          |
| 67        | Cell death                              | 1                  | 6                          |
| 69        | Cell microstructure                     | 1                  | 5                          |
| 70        | Cell size                               | 1                  | 4                          |
| 71        | Cell staining                           | 1                  | 6                          |
| 72        | Cell surface                            | 1                  | 5                          |
| 73        | Cellular morphology                     | 1                  | 4                          |
| 74        | <i>Ceratophyllum demersum</i>           | 1                  | 5                          |
| 75        | <i>Chlamydomonas reinhardtii</i>        | 1                  | 5                          |
| 77        | <i>Chlorella pyrenoidosa</i>            | 1                  | 5                          |
| 78        | <i>Chlorella sorokiniana</i>            | 1                  | 4                          |
| 79        | <i>Chlorella</i> strains                | 1                  | 3                          |
| 81        | <i>Chlorella vulgaris</i> microalgae    | 1                  | 2                          |
| 82        | <i>Chlorococcum</i> sp.                 | 1                  | 5                          |
| 83        | Chlorophyceae                           | 1                  | 5                          |
| 84        | Chlorophyll                             | 1                  | 4                          |
| 85        | Chlorophyll a                           | 1                  | 5                          |
| 86        | Chlorophyll content                     | 1                  | 4                          |
| 87        | Chlorophyll fluorescence                | 1                  | 5                          |
| 89        | Chromium                                | 1                  | 4                          |
| 90        | Cladocerans                             | 1                  | 4                          |
| 91        | Co(2) fixation                          | 1                  | 3                          |
| 92        | Co-culture                              | 1                  | 4                          |
| 93        | Colony formation                        | 1                  | 4                          |
| 94        | Combined pollution                      | 1                  | 4                          |
| 95        | Commercialization                       | 1                  | 5                          |
| 96        | Community assembly                      | 1                  | 5                          |
| 97        | Compositae                              | 1                  | 4                          |
| 98        | Contemporary selection                  | 1                  | 5                          |
| 99        | Cultivation strategy                    | 1                  | 4                          |
| 100       | Culture                                 | 1                  | 4                          |
| 102       | Cyanobacteria bloom                     | 1                  | 7                          |
| 103       | Cyanotoxins                             | 1                  | 4                          |
| 104       | Cyclic electron flow                    | 1                  | 4                          |
| 105       | Cysteine proteinase                     | 1                  | 5                          |
| 107       | Cytotoxicity test                       | 1                  | 4                          |
| 108       | Dangerous chemical                      | 1                  | 4                          |
| 109       | Diacylglycerol:acyl-coa acyltransferase | 1                  | 6                          |
| 110       | Diatoms                                 | 1                  | 5                          |
| 111       | Diatoxanthin                            | 1                  | 5                          |
| 112       | Differential sensivity                  | 1                  | 4                          |
| 113       | Digestive enzyme activity               | 1                  | 5                          |
| 114       | Dispersal limitation                    | 1                  | 5                          |
| 115       | Dissolved organic matter                | 1                  | 8                          |
| 116       | Dna fragment                            | 1                  | 5                          |
| 117       | <i>Dolichospermum affine</i>            | 1                  | 4                          |
| 118       | Drug synergism                          | 1                  | 4                          |
| 119       | Dynamic filter                          | 1                  | 5                          |
| 120       | Ecotoxicological effects                | 1                  | 5                          |

| <b>Id</b> | <b>Keyword</b>                     | <b>Occurrences</b> | <b>Total link strength</b> |
|-----------|------------------------------------|--------------------|----------------------------|
| 121       | Edaphic                            | 1                  | 4                          |
| 122       | Edxrma                             | 1                  | 5                          |
| 123       | El niño                            | 1                  | 8                          |
| 124       | Electrolyte leakage                | 1                  | 6                          |
| 126       | Energy reserves                    | 1                  | 4                          |
| 127       | Environmental risk assessment      | 1                  | 4                          |
| 128       | Episodic events                    | 1                  | 4                          |
| 129       | <i>Euglena pisciformis</i> aew501  | 1                  | 4                          |
| 130       | Euryhaline                         | 1                  | 6                          |
| 131       | Eutrophication                     | 1                  | 7                          |
| 132       | Evolutionary genetics              | 1                  | 2                          |
| 133       | <i>Exiguobacterium aurantiacum</i> | 1                  | 4                          |
| 134       | Exopolysaccharide production       | 1                  | 4                          |
| 135       | Experimental evolution             | 1                  | 2                          |
| 136       | Extracellular polysaccharides      | 1                  | 4                          |
| 137       | Fatty acid                         | 1                  | 4                          |
| 139       | Fenitrothion                       | 1                  | 4                          |
| 140       | Field experiment                   | 1                  | 5                          |
| 141       | Flood and drought                  | 1                  | 3                          |
| 143       | Food live                          | 1                  | 4                          |
| 145       | Fractionated photosynthesis        | 1                  | 4                          |
| 146       | Frap                               | 1                  | 4                          |
| 147       | Freshwater                         | 1                  | 4                          |
| 149       | Ftir                               | 1                  | 5                          |
| 150       | Galactolipids                      | 1                  | 5                          |
| 151       | Gamma irradiation stress           | 1                  | 2                          |
| 152       | Genome                             | 1                  | 3                          |
| 153       | Graphene oxide                     | 1                  | 3                          |
| 154       | Green algae                        | 1                  | 5                          |
| 156       | Growth rate                        | 1                  | 3                          |
| 157       | <i>Halomonas</i> sp.               | 1                  | 4                          |
| 158       | Harmful algal blooms               | 1                  | 4                          |
| 159       | Heavy metal                        | 1                  | 4                          |
| 160       | Heavy metals                       | 1                  | 4                          |
| 161       | Herbicide                          | 1                  | 5                          |
| 162       | Herbicides                         | 1                  | 6                          |
| 163       | Heterotrophic protists             | 1                  | 4                          |
| 164       | High temperature tolerance         | 1                  | 5                          |
| 165       | High trophic level                 | 1                  | 4                          |
| 166       | Humic acid                         | 1                  | 4                          |
| 167       | Humic acids                        | 1                  | 8                          |
| 168       | Hurricanes                         | 1                  | 8                          |
| 169       | Hybrid algal cultivation system    | 1                  | 6                          |
| 171       | Hypersalinity                      | 1                  | 8                          |
| 172       | Ice cover                          | 1                  | 4                          |
| 173       | Impact assessment                  | 1                  | 4                          |
| 174       | In situ dna methylation            | 1                  | 4                          |
| 175       | Independent action                 | 1                  | 5                          |
| 176       | <i>Indibacter alkaliphilus</i>     | 1                  | 4                          |
| 177       | Indicator values                   | 1                  | 6                          |

| <b>Id</b> | <b>Keyword</b>                           | <b>Occurrences</b> | <b>Total link strength</b> |
|-----------|------------------------------------------|--------------------|----------------------------|
| 178       | Inhibitory mechanisms                    | 1                  | 4                          |
| 179       | Ionizing irradiation stress              | 1                  | 4                          |
| 180       | Iron                                     | 1                  | 4                          |
| 181       | Irradiance                               | 1                  | 6                          |
| 182       | <i>Isochrysis galbana</i>                | 1                  | 5                          |
| 183       | Lake ecology                             | 1                  | 7                          |
| 184       | Lead                                     | 1                  | 4                          |
| 185       | Leupeptin                                | 1                  | 5                          |
| 186       | Limnetic                                 | 1                  | 6                          |
| 188       | Lipid accumulation                       | 1                  | 3                          |
| 189       | Lipid biosynthesis                       | 1                  | 4                          |
| 191       | Lipid classes pam fluorometry            | 1                  | 2                          |
| 192       | Lipid droplets                           | 1                  | 5                          |
| 193       | Lipid oxidation                          | 1                  | 4                          |
| 195       | Lipid production                         | 1                  | 4                          |
| 197       | Luteolin                                 | 1                  | 5                          |
| 198       | <i>M. Aeruginosa</i>                     | 1                  | 5                          |
| 199       | Macrophyte restoration                   | 1                  | 3                          |
| 200       | Massive blooms                           | 1                  | 6                          |
| 201       | Mechanistic effects                      | 1                  | 5                          |
| 202       | Membrane                                 | 1                  | 5                          |
| 203       | Metabolic compounds                      | 1                  | 4                          |
| 204       | Metabolism                               | 1                  | 2                          |
| 205       | Metallic nanoparticles                   | 1                  | 4                          |
| 208       | Microalgae cultivation                   | 1                  | 6                          |
| 210       | Microcystin toxin                        | 1                  | 3                          |
| 212       | Microcystins production                  | 1                  | 4                          |
| 215       | <i>Microcystis aeruginosa</i> inhibition | 1                  | 4                          |
| 216       | Microplastics                            | 1                  | 4                          |
| 217       | Micropollutants                          | 1                  | 5                          |
| 219       | Mode of toxic action                     | 1                  | 5                          |
| 220       | Moderate high-temperature stress         | 1                  | 3                          |
| 221       | Modified clay                            | 1                  | 4                          |
| 222       | Modified culture medium                  | 1                  | 4                          |
| 223       | <i>Moina sp.</i>                         | 1                  | 4                          |
| 224       | Morphological features                   | 1                  | 3                          |
| 225       | Mortality                                | 1                  | 6                          |
| 226       | Multiple environmental stressors         | 1                  | 5                          |
| 227       | Multiple stressor effects                | 1                  | 5                          |
| 228       | Municipal wastewater influent            | 1                  | 3                          |
| 229       | <i>Mychonastes</i>                       | 1                  | 3                          |
| 230       | <i>Myriophyllum spicatum</i>             | 1                  | 5                          |
| 231       | Nanaomycin a methyl ester (name)         | 1                  | 4                          |
| 232       | Nanoplastics                             | 1                  | 4                          |
| 233       | Neotropical                              | 1                  | 6                          |
| 234       | Nickel                                   | 1                  | 4                          |
| 235       | Nile red                                 | 1                  | 4                          |
| 236       | Nitrogen limitation                      | 1                  | 4                          |
| 237       | Nonphotochemical quenching               | 1                  | 4                          |
| 238       | Nutrient content                         | 1                  | 5                          |

| <b>Id</b> | <b>Keyword</b>                                    | <b>Occurrences</b> | <b>Total link strength</b> |
|-----------|---------------------------------------------------|--------------------|----------------------------|
| 240       | Open pond.                                        | 1                  | 6                          |
| 241       | Organelle                                         | 1                  | 5                          |
| 242       | Organic nutrients                                 | 1                  | 8                          |
| 243       | Over-compensatory growth                          | 1                  | 3                          |
| 244       | Oxidative damage                                  | 1                  | 5                          |
| 246       | Oxidative stress status                           | 1                  | 5                          |
| 248       | Paraquat                                          | 1                  | 5                          |
| 249       | Particulate organic carbon                        | 1                  | 4                          |
| 250       | Pbr                                               | 1                  | 6                          |
| 251       | Peroxidase                                        | 1                  | 9                          |
| 252       | Pesticides phytoplankton                          | 1                  | 2                          |
| 253       | Ph                                                | 1                  | 8                          |
| 254       | <i>Phaeodactylum tricornutum</i>                  | 1                  | 5                          |
| 255       | Pharmaceutical and personal care products (ppcps) | 1                  | 5                          |
| 256       | Phenanthrene                                      | 1                  | 4                          |
| 257       | Phenotypic plasticity                             | 1                  | 4                          |
| 258       | Phosphorus quota                                  | 1                  | 5                          |
| 259       | Photochemical efficiency                          | 1                  | 5                          |
| 260       | Photoinhibition                                   | 1                  | 5                          |
| 261       | Photoinhibitory light                             | 1                  | 9                          |
| 262       | Photoprotection                                   | 1                  | 5                          |
| 263       | Photorespiration                                  | 1                  | 9                          |
| 265       | Photosynthetic                                    | 1                  | 4                          |
| 266       | Photosynthetic activity                           | 1                  | 4                          |
| 267       | Photosynthetic efficiency                         | 1                  | 4                          |
| 268       | Photosynthetic electron transport                 | 1                  | 9                          |
| 269       | Photosystem i                                     | 1                  | 4                          |
| 270       | Phthalate esters                                  | 1                  | 4                          |
| 271       | Physiological characteristics                     | 1                  | 3                          |
| 274       | Phytoplankton communities                         | 1                  | 5                          |
| 275       | Phytoplankton species                             | 1                  | 4                          |
| 276       | Picocyanobacteria                                 | 1                  | 8                          |
| 277       | Picoeukaryotes                                    | 1                  | 4                          |
| 278       | Picophytoplankton                                 | 1                  | 3                          |
| 279       | Pigments                                          | 1                  | 4                          |
| 280       | Plankton                                          | 1                  | 4                          |
| 281       | Plastoquinone                                     | 1                  | 4                          |
| 282       | Pollution                                         | 1                  | 4                          |
| 283       | Polyethylene glycol                               | 1                  | 2                          |
| 284       | Pomegranate peel                                  | 1                  | 5                          |
| 285       | Poultry manure leachate                           | 1                  | 4                          |
| 286       | Primary producer                                  | 1                  | 4                          |
| 287       | Primary production                                | 1                  | 4                          |
| 288       | Principal component analysis                      | 1                  | 4                          |
| 289       | Priority pollutants                               | 1                  | 4                          |
| 290       | Programmed cell death                             | 1                  | 5                          |
| 291       | Protozoal protein                                 | 1                  | 5                          |
| 292       | <i>Pseudokirchneriella subcapitata</i>            | 1                  | 5                          |
| 293       | Psychrophile                                      | 1                  | 4                          |
| 294       | Psychrophiles                                     | 1                  | 5                          |

| <b>Id</b> | <b>Keyword</b>                                                 | <b>Occurrences</b> | <b>Total link strength</b> |
|-----------|----------------------------------------------------------------|--------------------|----------------------------|
| 295       | Pyrosequencing                                                 | 1                  | 5                          |
| 296       | Quercetin                                                      | 1                  | 5                          |
| 297       | Quorum sensing molecules                                       | 1                  | 4                          |
| 299       | Rbcl                                                           | 1                  | 5                          |
| 300       | Recovery capability                                            | 1                  | 4                          |
| 301       | Removal                                                        | 1                  | 4                          |
| 303       | Ros/no                                                         | 1                  | 5                          |
| 304       | Salinity                                                       | 1                  | 4                          |
| 305       | Salt stress                                                    | 1                  | 5                          |
| 306       | Scaling law                                                    | 1                  | 5                          |
| 307       | <i>Scenedesmus</i>                                             | 1                  | 4                          |
| 308       | <i>Scenedesmus acutus</i>                                      | 1                  | 4                          |
| 309       | <i>Scenedesmus obliquus</i>                                    | 1                  | 5                          |
| 310       | <i>Scenedesmus</i> . Xray microanalysis                        | 1                  | 5                          |
| 311       | Seawater                                                       | 1                  | 4                          |
| 312       | Sediments                                                      | 1                  | 4                          |
| 313       | Sherbicide tolerance                                           | 1                  | 6                          |
| 314       | Silica                                                         | 1                  | 5                          |
| 315       | Simetryn                                                       | 1                  | 6                          |
| 316       | Single-walled carbon nanotubes                                 | 1                  | 3                          |
| 317       | Size abundance relationship                                    | 1                  | 5                          |
| 318       | Sodium bicarbonate                                             | 1                  | 5                          |
| 319       | Species identification                                         | 1                  | 4                          |
| 320       | Species richness                                               | 1                  | 4                          |
| 321       | Spectral fluorescence                                          | 1                  | 5                          |
| 322       | Stable isotopes                                                | 1                  | 5                          |
| 323       | Starch                                                         | 1                  | 6                          |
| 324       | Storage                                                        | 1                  | 5                          |
| 325       | Sulfur deficiency                                              | 1                  | 6                          |
| 326       | Superoxide dismutase                                           | 1                  | 9                          |
| 327       | Superoxide radical                                             | 1                  | 9                          |
| 328       | Superpro designer                                              | 1                  | 6                          |
| 329       | Synchrotron-based fourier transform infrared spectromicroscopy | 1                  | 5                          |
| 330       | <i>Synechococcus</i>                                           | 1                  | 4                          |
| 331       | Tag                                                            | 1                  | 4                          |
| 332       | Tem                                                            | 1                  | 4                          |
| 334       | <i>Tetraselmis suecica</i>                                     | 1                  | 5                          |
| 335       | Thiamine                                                       | 1                  | 4                          |
| 336       | Tocopherol                                                     | 1                  | 5                          |
| 337       | Tolerant strain                                                | 1                  | 4                          |
| 338       | Toxicities                                                     | 1                  | 3                          |
| 340       | Triacylglycerols                                               | 1                  | 6                          |
| 341       | Triazine                                                       | 1                  | 6                          |
| 342       | Triclosan                                                      | 1                  | 5                          |
| 343       | Triglycerides                                                  | 1                  | 3                          |
| 344       | Turbulence                                                     | 1                  | 4                          |
| 345       | Two-stage cultivation                                          | 1                  | 4                          |
| 346       | Ultrasound                                                     | 1                  | 4                          |
| 347       | Ultrastructural changes                                        | 1                  | 4                          |
| 348       | Ultrastructure                                                 | 1                  | 3                          |

---

| <b>Id</b> | <b>Keyword</b>                    | <b>Occurrences</b> | <b>Total link strength</b> |
|-----------|-----------------------------------|--------------------|----------------------------|
| 350       | Unsaturation                      | 1                  | 6                          |
| 351       | Uptake                            | 1                  | 5                          |
| 352       | Uv-filters                        | 1                  | 4                          |
| 353       | Uvr                               | 1                  | 5                          |
| 354       | <i>Vallisneria asiatica</i>       | 1                  | 3                          |
| 355       | Variable fluorescence             | 1                  | 5                          |
| 356       | Wastewater                        | 1                  | 6                          |
| 357       | Water quality                     | 1                  | 6                          |
| 358       | Water-soluble species in pm (2.5) | 1                  | 5                          |
| 359       | Winter                            | 1                  | 4                          |
| 360       | <i>Xanthomonas sp</i>             | 1                  | 4                          |
| 361       | Mft-ir                            | 1                  | 5                          |

Keywords are ordered according to co-occurrence from largest to smallest.



**Table S3:** Keyword list freshwater phytoplankton with mention of eutrophication process

| id | Keyword                                 | occurrences | total link strength |
|----|-----------------------------------------|-------------|---------------------|
| 53 | <i>Microcystis aeruginosa</i>           | 4           | 17                  |
| 3  | Allelochemicals                         | 2           | 9                   |
| 25 | Cyanobacteria                           | 2           | 9                   |
| 49 | Microalgae                              | 2           | 8                   |
| 1  | Actinomycete metabolite                 | 1           | 4                   |
| 2  | Adaptation                              | 1           | 3                   |
| 4  | Allelopathic effect                     | 1           | 5                   |
| 5  | Antioxidant enzymes                     | 1           | 3                   |
| 6  | Antioxidant enzyme activity             | 1           | 5                   |
| 7  | Antioxidant enzymes                     | 1           | 4                   |
| 8  | Artemisinin                             | 1           | 4                   |
| 9  | Associated bacteria                     | 1           | 4                   |
| 10 | Autotrophy                              | 1           | 4                   |
| 11 | <i>Bacillus okhensis</i>                | 1           | 4                   |
| 12 | Biodegradation                          | 1           | 4                   |
| 13 | Biomass                                 | 1           | 4                   |
| 14 | Bisphenol a                             | 1           | 4                   |
| 15 | <i>Brachionus calyciflorus</i>          | 1           | 5                   |
| 16 | Carbohydrates                           | 1           | 4                   |
| 17 | Carbon allocation                       | 1           | 5                   |
| 18 | Caspase-3-like activity                 | 1           | 5                   |
| 19 | Catalase                                | 1           | 5                   |
| 20 | Cell cycle                              | 1           | 4                   |
| 21 | Cell density                            | 1           | 4                   |
| 22 | <i>Chlorella sorokiniana</i>            | 1           | 4                   |
| 23 | Colony formation                        | 1           | 4                   |
| 24 | Compositae                              | 1           | 4                   |
| 26 | Cyanotoxins                             | 1           | 4                   |
| 27 | Diatoxanthin                            | 1           | 5                   |
| 28 | Digestive enzyme activity               | 1           | 5                   |
| 29 | Edxрма                                  | 1           | 5                   |
| 30 | Episodic events                         | 1           | 4                   |
| 31 | <i>Exiguobacterium aurantiacum</i>      | 1           | 4                   |
| 32 | Exopolysaccharide production            | 1           | 4                   |
| 33 | Extracellular polysaccharides           | 1           | 4                   |
| 34 | Fatty acids                             | 1           | 4                   |
| 35 | Flow cytometry                          | 1           | 4                   |
| 36 | Fourier transform infrared spectroscopy | 1           | 5                   |
| 37 | Freshwater phytoplankton                | 1           | 5                   |
| 38 | Ftir                                    | 1           | 5                   |

---

| id | Keyword                                  | occurrences | total link strength |
|----|------------------------------------------|-------------|---------------------|
| 39 | Galactolipids                            | 1           | 5                   |
| 40 | Genome                                   | 1           | 3                   |
| 41 | <i>Halomonas sp.</i>                     | 1           | 4                   |
| 42 | Heavy metal                              | 1           | 4                   |
| 43 | High trophic level                       | 1           | 4                   |
| 44 | <i>Indibacter alkaliphilus</i>           | 1           | 4                   |
| 45 | Inhibitory mechanisms                    | 1           | 4                   |
| 46 | Luteolin                                 | 1           | 5                   |
| 47 | <i>M. Aeruginosa</i>                     | 1           | 5                   |
| 48 | Metabolic compounds                      | 1           | 4                   |
| 50 | Microcystin                              | 1           | 4                   |
| 51 | Microcystins                             | 1           | 5                   |
| 52 | <i>Microcystis</i>                       | 1           | 4                   |
| 54 | <i>Microcystis aeruginosa</i> inhibition | 1           | 4                   |
| 55 | Mixotrophy                               | 1           | 4                   |
| 56 | Moderate high-temperature stress         | 1           | 3                   |
| 57 | <i>Mychonastes</i>                       | 1           | 3                   |
| 58 | <i>Myriophyllum spicatum</i>             | 1           | 5                   |
| 59 | Nanaomycin a methyl ester (name)         | 1           | 4                   |
| 60 | Nutrient content                         | 1           | 5                   |
| 61 | Over-compensatory growth                 | 1           | 3                   |
| 62 | Oxidative damage                         | 1           | 5                   |
| 63 | Particulate organic carbon               | 1           | 4                   |
| 64 | Phenotypic plasticity                    | 1           | 4                   |
| 65 | Phosphorus quota                         | 1           | 5                   |
| 66 | Photoinhibition                          | 1           | 5                   |
| 67 | Photosynthetic efficiency                | 1           | 4                   |
| 68 | Physiological response                   | 1           | 4                   |
| 69 | Phytoplankton                            | 1           | 4                   |
| 70 | Phytoplankton species                    | 1           | 4                   |
| 71 | Picophytoplankton                        | 1           | 3                   |
| 72 | Pomegranate peel                         | 1           | 5                   |
| 73 | Poultry manure leachate                  | 1           | 4                   |
| 74 | Programmed cell death                    | 1           | 5                   |
| 75 | Psychrophiles                            | 1           | 5                   |
| 76 | Quercetin                                | 1           | 5                   |
| 77 | Ros/no                                   | 1           | 5                   |
| 78 | Salinity                                 | 1           | 4                   |
| 79 | <i>Scenedesmus</i> . Xray microanalysis  | 1           | 5                   |
| 80 | Spectral fluorescence                    | 1           | 5                   |
| 81 | Stable isotopes                          | 1           | 5                   |

---

| id | Keyword                | occurrences | total link strength |
|----|------------------------|-------------|---------------------|
| 82 | <i>Synechococcus</i>   | 1           | 4                   |
| 83 | Temperature            | 1           | 4                   |
| 84 | Thiamine               | 1           | 4                   |
| 85 | Ultraviolet radiation  | 1           | 5                   |
| 86 | Uvr                    | 1           | 5                   |
| 87 | Variable fluorescence  | 1           | 5                   |
| 88 | <i>Xanthomonas sp.</i> | 1           | 4                   |

Keywords are ordered according to co-occurrence from largest to smallest.

**Table S4.** Freshwater phytoplankton studies that mention the eutrophication process and some approach to lipid analysis

| Species                                                      | Climate | Method                                                                                             | Registered lipid molecules                                                                                                                                                                               | Result                                                                                                                                   | References |
|--------------------------------------------------------------|---------|----------------------------------------------------------------------------------------------------|----------------------------------------------------------------------------------------------------------------------------------------------------------------------------------------------------------|------------------------------------------------------------------------------------------------------------------------------------------|------------|
| <i>Borghiella dodgei</i>                                     | Dfb     | Liquid chromatography–mass spectrometry                                                            | Digalactosyldiacylglycerol<br>Monogalactosyldiacylglycerols                                                                                                                                              | In UVR-exposed cells, the galactolipid content was higher and was associated with an increase in monogalactosyl-diacylglycerols.         | 42         |
| <i>Chlamydomonas mexicana</i> .<br><i>Chlorella vulgaris</i> | Dfa     | Gas chromatography with a flame ionization detector                                                | Capric acid (C10:0)<br>Myristic acid (C14:0)<br>Palmitic acid (C16:0)<br>Palmitoleic acid (C16:1)<br>Oleic acid (C18:1)<br>Linoleic acid (C18:2)<br>Linolenic acid (C18:3)<br>Arachidic acids (C20:0)    | Polyunsaturated fatty acid levels increased with BPA concentration.                                                                      | 43         |
| <i>Microcystis aeruginosa</i>                                | Cfa     | MDA content was measured using the thiobarbituric acid (TBA) reaction by Malondialdehyde assay kit | They report the lipid peroxidation level                                                                                                                                                                 | Higher concentration of single-walled carbon nanotubes increases lipid peroxidation.                                                     | 44         |
| <i>Mychonastes homosphaera</i>                               | Cfa     | Genome sequences in the KEGG database                                                              | Genes related to the fatty acid biosynthesis pathways: ACC, MAT, KAS3, KAR, HD, EAR, PAH, OAH, KAS1, KAS2 and TCA (glycerolipid) metabolism pathways: GK, GPAT, AGPAT, PP, DGAT, PDAT, TAG, DGAT1, DGAT2 | The species have the potential for biodiesel production by synthesising long chain unsaturated fatty acids.                              | 30         |
| <i>Scenedesmus subspicatus</i>                               | Cfb     | Synchrotron-based Fourier transform infrared (FTIR) microspectroscopy                              | Groups of esters associated with lipids and fatty acids were recorded, but without distinguishing specific lipids                                                                                        | Under phosphorus-limited conditions stress promotes a shift in carbon allocation, increasing the proportion of lipids and carbohydrates. | 45         |

**Table S5:** Keyword list of tropical freshwater phytoplankton.

| <b>Id</b> | <b>Keyword</b>                  | <b>Occurrences</b> | <b>Total link strength</b> |
|-----------|---------------------------------|--------------------|----------------------------|
| 34        | Microalgae                      | 5                  | 19                         |
| 12        | Biomass                         | 2                  | 7                          |
| 16        | Cell density                    | 2                  | 8                          |
| 19        | <i>Chlorella vulgaris</i>       | 2                  | 10                         |
| 1         | 18s rdna                        | 1                  | 4                          |
| 2         | Amazon                          | 1                  | 4                          |
| 3         | Amazonia                        | 1                  | 3                          |
| 4         | Antimicrobial                   | 1                  | 4                          |
| 5         | Antioxidant enzymes             | 1                  | 4                          |
| 6         | Antioxidants                    | 1                  | 4                          |
| 7         | Aquaculture                     | 1                  | 4                          |
| 8         | Autotrophy                      | 1                  | 4                          |
| 9         | Biodiesel                       | 1                  | 3                          |
| 10        | Biodiversity                    | 1                  | 4                          |
| 11        | Biofuels                        | 1                  | 3                          |
| 13        | Biotechnology                   | 1                  | 3                          |
| 14        | Biovolume                       | 1                  | 3                          |
| 15        | Cell cycle                      | 1                  | 4                          |
| 17        | <i>Chlorella sorokiniana</i>    | 1                  | 4                          |
| 18        | <i>Chlorella strains</i>        | 1                  | 3                          |
| 20        | Chlorophyll                     | 1                  | 4                          |
| 21        | Cladocerans                     | 1                  | 4                          |
| 22        | CO <sub>2</sub> fixation        | 1                  | 3                          |
| 23        | Culture                         | 1                  | 4                          |
| 24        | Drug synergism                  | 1                  | 4                          |
| 25        | Edaphic                         | 1                  | 4                          |
| 26        | Exopolysaccharide production    | 1                  | 4                          |
| 27        | Flood and drought               | 1                  | 3                          |
| 28        | Food live                       | 1                  | 4                          |
| 29        | Freshwater                      | 1                  | 4                          |
| 30        | Growth rate                     | 1                  | 3                          |
| 31        | Heavy metal                     | 1                  | 4                          |
| 32        | Hybrid algal cultivation system | 1                  | 6                          |
| 33        | Lipid accumulation              | 1                  | 3                          |
| 35        | Microalgae cultivation          | 1                  | 6                          |
| 36        | Mixotrophy                      | 1                  | 4                          |
| 37        | <i>Moina sp.</i>                | 1                  | 4                          |
| 38        | Morphological features          | 1                  | 3                          |
| 39        | Municipal wastewater influent   | 1                  | 3                          |
| 40        | Nile red                        | 1                  | 4                          |
| 41        | Open pond                       | 1                  | 6                          |
| 42        | Pbr                             | 1                  | 6                          |
| 43        | Phenotypic plasticity           | 1                  | 4                          |
| 44        | Photosynthetic efficiency       | 1                  | 4                          |
| 45        | Phytoplankton                   | 1                  | 3                          |
| 46        | Pigments                        | 1                  | 4                          |
| 47        | Plankton                        | 1                  | 4                          |
| 48        | Poultry manure leachate         | 1                  | 4                          |
| 49        | Ros                             | 1                  | 4                          |

---

| <b>Id</b> | <b>Keyword</b>         | <b>Occurrences</b> | <b>Total link strength</b> |
|-----------|------------------------|--------------------|----------------------------|
| 50        | Salinity               | 1                  | 4                          |
| 51        | Species identification | 1                  | 4                          |
| 52        | Species richness       | 1                  | 4                          |
| 53        | Superpro designer      | 1                  | 6                          |
| 54        | <i>Synechococcus</i>   | 1                  | 4                          |
| 55        | Triglycerides          | 1                  | 3                          |
| 56        | Wastewater             | 1                  | 6                          |

Keywords are ordered according to co-occurrence from largest to smallest.
